# Supplementary material for: Local adaptations of Mediterranean sheep and goats through an integrative approach
Source: PubMed Central journal article supplement (PMC8560853; doi:10.1038/s41598-021-00682-z), 2021-11-01
Supplement: 41598_2021_682_MOESM1_ESM.pdf [file 41598_2021_682_MOESM1_ESM.pdf]

## Supplemental Information for:

# Local adaptations of Mediterranean sheep and goats through an integrative approach

Bruno Serranito<sup>1,2#</sup>, Marco Cavalazzi<sup>3#</sup>, Pablo Vidal<sup>4</sup>, Dominique Taurisson-Mouret<sup>5</sup>, Elena Ciani<sup>6</sup>, Marie Bal<sup>3</sup>, Eric Rouvellac<sup>3</sup>, Bertrand Servin<sup>7</sup>, Carole Moreno-Romieux<sup>7</sup>, Gwenola Tossier-Klopp<sup>7</sup>, Stephen J. G. Hall<sup>8</sup>, Johannes A. Lenstra<sup>9</sup>, François Pompanon<sup>10</sup>, Badr Benjelloun<sup>10,11</sup>, Anne Da Silva<sup>1\*</sup>

#: Serranito B. and Cavalazzi M. should be considered joint first author

\* Correspondence: [anne.blondeau@unilim.fr](mailto:anne.blondeau@unilim.fr)

## Table of Contents:

|                                                                                                                                                                                                                                                                                                                                                                        |             |
|------------------------------------------------------------------------------------------------------------------------------------------------------------------------------------------------------------------------------------------------------------------------------------------------------------------------------------------------------------------------|-------------|
| <b>Supplementary Table 1.</b> Initial list breeds for the constitution of the datasets.                                                                                                                                                                                                                                                                                | Page 1      |
| <b>Supplementary Figure 1.</b> Synthetic schema of the main steps for the proposed approach.                                                                                                                                                                                                                                                                           | Page 2      |
| <b>Supplementary Table 2.</b> Description of the breeds included in the sheep and goat datasets. Number of individuals considered, country of origin, information on the breed history, geographical definition of the cradle, description of the breed, use and status.                                                                                               | Pages 3-14  |
| <b>Supplementary Figure 2.</b> LD analyses for sheep and goats.                                                                                                                                                                                                                                                                                                        | Page 15     |
| <b>Supplementary Text 1.</b> Genetic structure assessment: admixture analyses, sNMF cross-entropies and Mantel tests.                                                                                                                                                                                                                                                  | Pages 16-18 |
| <b>Supplementary Text 2.</b> Environmental characterization: comparison between GPS and cradle methods.                                                                                                                                                                                                                                                                | Pages 19-21 |
| <b>Supplementary Figure 3.</b> Display of the selection signatures obtained with the goat dataset for the different methods tested, <i>i.e.</i> cradle method, GPS area method and individual GPS method, using the LFMM approach and considering individually the variables: Annual Mean Temperature, Annual Mean Precipitation and Altitude                          | Pages 22-24 |
| <b>Supplementary Figure 4.</b> Display of the selection signatures obtained on the goat dataset for the cradle method and the GPS area method, using the LFMM approach; cradles and GPS areas were characterized by all the environmental variables available; a PCA followed by an HCPC allowed to group areas according to their similarity in terms of environment. | Page 25     |

|                                                                                                                                                                                                                                                                                                                                                                                                                                                                                                                                                                                                                                                                                                                                                                                                                                                                                  |                    |
|----------------------------------------------------------------------------------------------------------------------------------------------------------------------------------------------------------------------------------------------------------------------------------------------------------------------------------------------------------------------------------------------------------------------------------------------------------------------------------------------------------------------------------------------------------------------------------------------------------------------------------------------------------------------------------------------------------------------------------------------------------------------------------------------------------------------------------------------------------------------------------|--------------------|
| <p><b>Supplementary Figure 5.</b> Goat “GPS areas” analyzed as a function of environmental variables. 1) Mapping display of the “GPS areas” coloured according to the result of the clustering. 2) Hierarchical Clustering on Principal Component (HCPC) analysis. a) Scree plot. b) PCA correlation circle. c) PCA score plot of goat cradles. Colours represent the main clusters obtained by HCPC for K=5. PC 1 and PC 2 represent respectively principal components 1 and 2; numbers in brackets show the variance explained by each PC. 3) Boxplot representation for the variables Annual Mean Temperature, Annual Mean Precipitation and Altitude for the different groups and associated numerical values. Alt.: Altitude in m (meters), T°: Temperature in °C×10, prec.: Precipitation in mm (millimeters), min.: minimal, max.: maximal, s.d.: standard deviation.</p> | <p>Page 26</p>     |
| <p><b>Supplementary Figure 6.</b> PCAadapt scree plots, a) considering the goat dataset, b) considering the sheep dataset.</p>                                                                                                                                                                                                                                                                                                                                                                                                                                                                                                                                                                                                                                                                                                                                                   | <p>Page 27</p>     |
| <p><b>Supplementary Table 3.</b> Selection signatures identified in goats according to the LFMM and PCAadapt approach and using the cradle method: detailed literature review.</p>                                                                                                                                                                                                                                                                                                                                                                                                                                                                                                                                                                                                                                                                                               | <p>Pages 28-40</p> |
| <p><b>Supplementary Table 4.</b> Selection signatures identified in sheep according to the LFMM and PCAadapt approach and using the cradle method: detailed literature review.</p>                                                                                                                                                                                                                                                                                                                                                                                                                                                                                                                                                                                                                                                                                               | <p>Pages 41-52</p> |
| <p><b>Supplementary Table 5.</b> Details concerning the selection signatures identified in goats and sheep: name and position of the SNPs.</p>                                                                                                                                                                                                                                                                                                                                                                                                                                                                                                                                                                                                                                                                                                                                   | <p>Page 53-68</p>  |
| <p><b>Supplementary Table 6.</b> Display of the selection signatures identified in the goat dataset. The figures have been modified from outputs obtained via NCBI Genome Data Viewer (<a href="https://www.ncbi.nlm.nih.gov/genome/gdv/">https://www.ncbi.nlm.nih.gov/genome/gdv/</a>): ARS1. SNPs under selection (see their name and position in Supplementary Table 5) are symbolized by stars; red stars = SNPs identified by PCAadapt (and plots associated), green stars = SNPs identified by LFMM.</p>                                                                                                                                                                                                                                                                                                                                                                   | <p>Page 69-85</p>  |
| <p><b>Supplementary Table 7.</b> Display of the selection signatures identified in the sheep dataset. The figures have been modified from outputs obtained via NCBI Genome Data Viewer (<a href="https://www.ncbi.nlm.nih.gov/genome/gdv/">https://www.ncbi.nlm.nih.gov/genome/gdv/</a>): Oar_v3.1. SNPs under selection (see their name and position in Supplementary Table 5) are symbolized by stars; red stars = SNPs identified by PCAadapt (and plots associated), green stars = SNPs identified by LFMM.</p>                                                                                                                                                                                                                                                                                                                                                              | <p>Page 86-98</p>  |
| <p><b>Supplementary Text 3.</b> Discussion and classification of identified genes according to the literature.</p>                                                                                                                                                                                                                                                                                                                                                                                                                                                                                                                                                                                                                                                                                                                                                               | <p>Page 99-112</p> |

| <b>Goat breed</b>              | <b>country</b> |
|--------------------------------|----------------|
| Alpine                         | France         |
| Angora                         | France         |
| Corse                          | France         |
| Fosses                         | France         |
| Poitevine                      | France         |
| Provencale                     | France         |
| Pyrenean                       | France         |
| Saanen                         | France         |
| Alpine                         | Italy          |
| Argentata                      | Italy          |
| Aspromontana                   | Italy          |
| Bionda dell'Adamello           | Italy          |
| Ciociarra Grigia               | Italy          |
| Di Teramo                      | Italy          |
| Garganica                      | Italy          |
| Girgentana                     | Italy          |
| Jonica                         | Italy          |
| Maltese sarda                  | Italy          |
| Maltese                        | Italy          |
| Nicastrese                     | Italy          |
| Orobica                        | Italy          |
| Rossa Mediterranea             | Italy          |
| Saanen                         | Italy          |
| Sarda                          | Italy          |
| Valdostana                     | Italy          |
| Valpassiria                    | Italy          |
| Bermeya                        | Spain          |
| Mallorquina                    | Spain          |
| Malaguena                      | Spain          |
| Murciano-Granadina             | Spain          |
| Palmera (Canaria island breed) | Spain          |
| Blanca de Rasquera             | Spain          |

| <b>Sheep breed</b>        | <b>country</b> |
|---------------------------|----------------|
| Mourerous Alpes du Sud    | France         |
| Mérinos d'Arles           | France         |
| Lacaune (lait)            | France         |
| Blanche du Massif Central | France         |
| Berrichon du Cher         | France         |
| Romane                    | France         |
| Rouge de l'Ouest          | France         |
| Mérinos de Rambouillet    | France         |
| Tarasconnaise             | France         |
| Rava                      | France         |
| Noire du Velay            | France         |
| Limousine                 | France         |
| Lacaune (viande)          | France         |
| Préalpes du Sud           | France         |
| Manech tête rousse        | France         |
| Corse                     | France         |
| Romanov                   | France         |
| Suffolk                   | France         |
| Vendéen                   | France         |
| Charollais                | France         |
| Causses du Lot            | France         |
| Ouessant (Bretagne)       | France         |
| Charmoise                 | France         |
| Roussin de la Hague       | France         |
| Île-de-France             | France         |
| Texel                     | France         |
| Altamura                  | Italy          |
| Comisana                  | Italy          |
| Leccese                   | Italy          |
| Sarda                     | Italy          |
| Appenninica               | Italy          |
| Sopravissana              | Italy          |
| Gentile Di Puglia         | Italy          |
| Delle Langhe              | Italy          |
| Pinzirità                 | Italy          |
| Bergamasca                | Italy          |
| Bagnolese                 | Italy          |
| Laticauda                 | Italy          |
| Alpagota                  | Italy          |
| Altamura                  | Italy          |
| Massese                   | Italy          |
| Fabrianese                | Italy          |
| Ripollesa                 | Spain          |
| Xisqueta                  | Spain          |
| Roja Mallorquina          | Spain          |
| Canaria de pelo           | Spain          |
| Gallega                   | Spain          |
| Segureña                  | Spain          |
| Castellana                | Spain          |
| Churra                    | Spain          |
| Ojalada                   | Spain          |

Supplementary Table 1

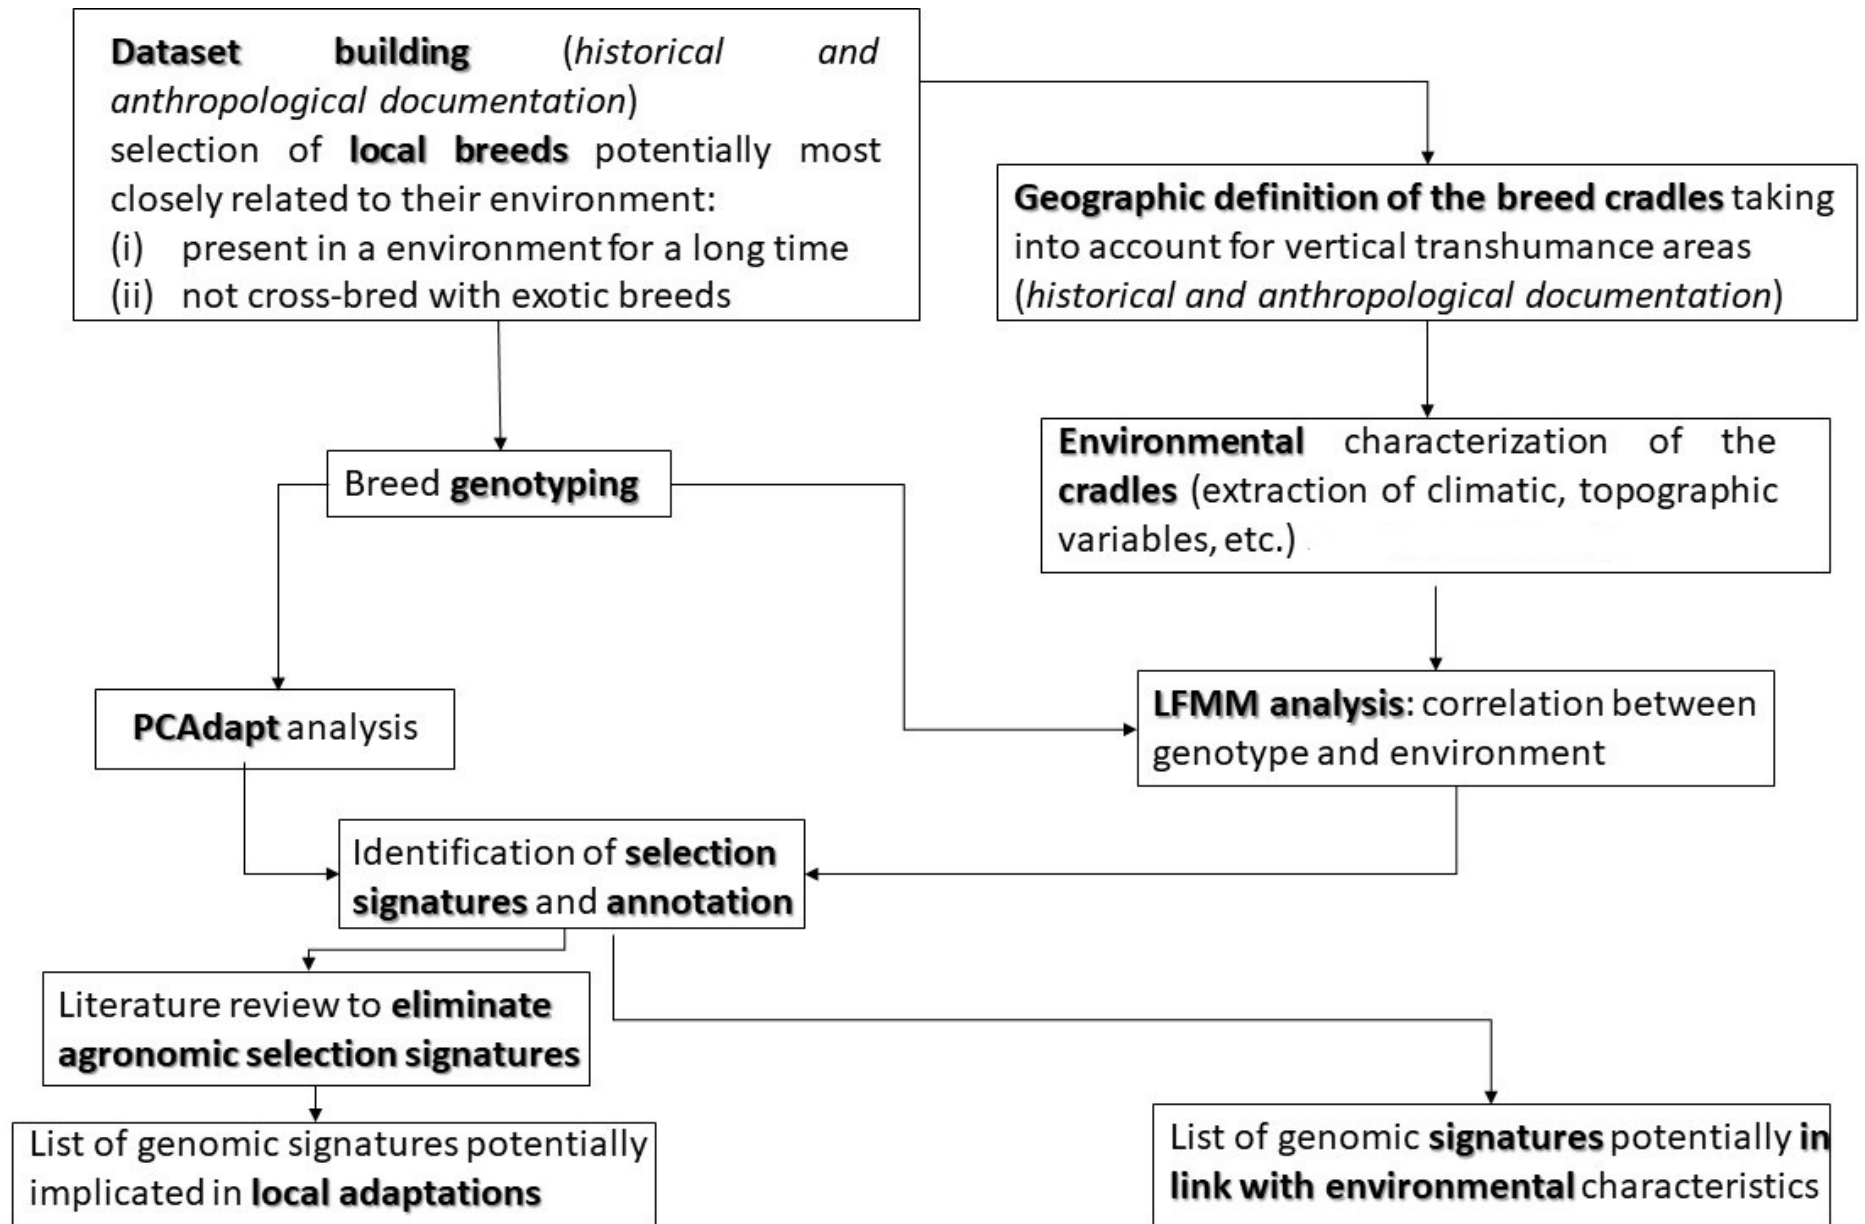

Supplementary Figure 1

## Supplementary Table 2

| Goat Breeds (code and number of individuals)              | country | Origin/History                                                                                                                                                                                                                                                                                                                                                                    | Cradle of the breed/transhumant area if practiced in the past and/or today                                                                                                                                                                                      | Description/adaptation                                                                                                                                                                     | Production/use                         | Status (according to FAO 2007 if not mentioned) |
|-----------------------------------------------------------|---------|-----------------------------------------------------------------------------------------------------------------------------------------------------------------------------------------------------------------------------------------------------------------------------------------------------------------------------------------------------------------------------------|-----------------------------------------------------------------------------------------------------------------------------------------------------------------------------------------------------------------------------------------------------------------|--------------------------------------------------------------------------------------------------------------------------------------------------------------------------------------------|----------------------------------------|-------------------------------------------------|
| Bionda dell Adamello (BIO, n=24)                          | Italy   | The breed seems to be ancient. A painting from around 1760 by the Milanese painter Francesco Londonio shows a goat of the Bionda dell'Adamello type (Bigi & Zanon, 2008).                                                                                                                                                                                                         | The Val Camonica in the province of Brescia, in Lombardy in northern Italy. It takes its name from the massif of the Adamello, part of the Adamello-Presanella subsection of the Rhaetian Alps.<br><br>Transhumance in Alpine pasture (Caballero et al., 2009). | Medium to large size long hair ranging from light brown to blonde two white streaks on the muzzle<br><br>Adaptation to pasture in the mountains                                            | Milk also meat<br>Extensive management | Not at risk                                     |
| Valdostana (also called Chamoisée Valdôtaine) (VAL, n=24) |         | Publications dating back to 1917 mention its existence, and suggest an older origin. It would have been the result of hybridation between wild and domesticated animals ( <a href="http://www.agraria.com">http://www.agraria.com</a> ).                                                                                                                                          | Aosta Valley in northwestern Italy, particularly in the lower Ayas and Lys valleys.<br><br>Transhumance in Alpine pasture, (Caballero et al., 2009).                                                                                                            | Medium-large-sized animals Short dark blond hair large horns (selection for the traditional "Batailles de Chèvres", Talenti et al., 2017)<br><br>Adaptation to pasture in the mountains    | Milk/meat<br>Extensive management      | Critical                                        |
| Orobica (ORO, n=24)                                       |         | Ancient breed: The Milanese painter (17 <sup>th</sup> century) Lonati Verri represents goats of the Orobica type. A Milanese lithograph from the early 19 <sup>th</sup> century depicts a goatherd with some of his animals near the Eastern Porta (now Porta Venezia). Official documents mention the existence of the breed as early as 1829 (Corti et al., 1997; Corti, 2006). | The Val Gerola in the province of Sondrio, in the Bergamo Alps of northern Italy.<br><br>Transhumance in Alpine pasture (Caballero et al., 2009).                                                                                                               | Medium size long horns with flat section in males and erect ears fine long hair, with a colour varying from uniform ash-grey to violet-beige<br><br>Adaptation to pasture in the mountains | Milk<br>Extensive management           | Endangered                                      |

|                                                                                                                                  |                                                                                                                                                                                                              |                                                                                                                                                                                                                                                                                     |                                                                                                                                                                     |                                 |             |
|----------------------------------------------------------------------------------------------------------------------------------|--------------------------------------------------------------------------------------------------------------------------------------------------------------------------------------------------------------|-------------------------------------------------------------------------------------------------------------------------------------------------------------------------------------------------------------------------------------------------------------------------------------|---------------------------------------------------------------------------------------------------------------------------------------------------------------------|---------------------------------|-------------|
| Val Passiria<br>(also called Passiria/<br>Camosciata delle<br>Alpi/Passeirer<br>Gebirgsziege/Chèvre<br>Chamoisée)<br>(VSS, n=24) | Breed that seems to have<br>originated from Switzerland<br>(Porter, 2002).                                                                                                                                   | Adapted to the valleys bordering<br>Austria (Val Passiria, Upper<br>Isarco, Sarntal and Val Senales)<br><br>Transhumance in Alpine pasture<br>(Caballero et al., 2009).                                                                                                             | Medium size<br>Medium to long hair<br>dark coat (from black to grey)<br><br>Adaptation to pasture in the<br>mountains/ good adaptation<br>to the most extreme areas | Meat<br>Extensive<br>management | Unkown      |
| Di Teramo<br>(DIT, n=24)                                                                                                         | Indigenous breed of the province of<br>Teramo, <del>unknown</del> origin but<br>probable crossbreeds with<br>Garganica goat (Porter, 2002;<br><a href="http://www.agraria.com">http://www.agraria.com</a> ). | Province of Teramo, Abruzzi<br>Region.<br><br>Transhumance in the mountain<br>pastures of Abruzzo (Caballero et<br>al., 2009).                                                                                                                                                      | Medium size<br>horns in both sexes<br>Long dark hair (black, brown,<br>grey)                                                                                        | Milk                            | Critical    |
| Ciociarà Grigia<br>(CCG, n=19)                                                                                                   | Indigenous breed of Lazio in central<br>Italy, <del>unknown</del> origin but probable<br>crossbreeds with Garganica goat<br>(Porter, 2002).                                                                  | It is thought to have originated in<br>the area of the Monti Aurunci<br>and the Monti Ausoni. It takes its<br>name from the Ciociaria, the area<br>around Frosinone.<br><br>Transhumance in the mountain<br>pastures of Abruzzo and<br>Campania plains (Caballero et al.,<br>2009). | Medium sized, dark silvery<br>grey and light coat                                                                                                                   | Milk/meat                       | Endangered  |
| Garganica<br>(GAR, n=20)                                                                                                         | Indigenous to the Gargano, it<br>derives from cross-breeding of local<br>animals with goats imported from<br>western Europe (Porter, 2002;<br><a href="http://www.agraria.com">http://www.agraria.com</a> ). | Gargano promontory in the<br>Puglia region of southern Italy.<br><br>Transhumance in Puglia.                                                                                                                                                                                        | Medium size<br>black, with long hair<br>Horns are quite big<br><br>Hardy and gregarious animal,<br>adapted to very difficult<br>habitat (Bigi & Zanon, 2008)        | Milk/meat                       | Endangered  |
| Argentata Dell'Etna<br>(ARG, n=25)                                                                                               | Indigenous breed of Mount Etna<br>(Porter, 2002).                                                                                                                                                            | The area of Mount Etna in the<br>province of Catania and the                                                                                                                                                                                                                        | Medium size<br>silvery grey coat, medium-long<br>hair                                                                                                               | Raised<br>primarily for<br>milk | Not at risk |

|                        |        |                                                                                                                                                                     |                                                                                                                                                                      |                                                                                                                                         |                                   |                                                                                                                                                                         |
|------------------------|--------|---------------------------------------------------------------------------------------------------------------------------------------------------------------------|----------------------------------------------------------------------------------------------------------------------------------------------------------------------|-----------------------------------------------------------------------------------------------------------------------------------------|-----------------------------------|-------------------------------------------------------------------------------------------------------------------------------------------------------------------------|
|                        |        |                                                                                                                                                                     | Monti Peloritani in the province of Messina, in Sicily.                                                                                                              | horns of the females are upright<br><br>Adaptation to scarce pastures of Sicily (Rubino, 1993)                                          | production, and also for meat     |                                                                                                                                                                         |
| Nicastrese (NIC, n=25) |        | Byzantine origin, photographic evidence suggests that it may be closely connected to the old "Araba" breed of the area (Bigi & Zannon, 2008).                       | The province of Catanzaro in southern Italy.                                                                                                                         | Small size<br>Black coat (keshmir undercoat), long hair                                                                                 | Milk/meat                         | Critical                                                                                                                                                                |
| Girgentana (GGT, n=30) |        | Would have arrived in Sicily with the Greeks in the 8 <sup>th</sup> century ( <a href="http://www.agraria.com">http://www.agraria.com</a> ; Porter, 2002).          | The Agrigento coast in Sicily.                                                                                                                                       | Medium size<br>Spiral horns, long and white hair<br><br>Hardy breed                                                                     | Milk<br>High prolificity          | Threatened by extinction, 400 heads recorded in 1950 (Bigi & Zannon, 2008)                                                                                              |
| Corse (CRS, n=29)      | France | The presence on the island has been documented for several millennia ( <a href="https://www.racesdefrance.fr">https://www.racesdefrance.fr</a> ).                   | Corsican massifs, in particular the valleys of Caccia and Niolo.<br><br>Double transhumance between plains in winter and mountains in summer (Ravis-Giordani, 2001). | Small size<br>curved parallel horns<br>long hair, heterogeneous coat color<br><br>Hardy breed/ adaptation to scarce and rugged pastures | Milk/meat<br>Extensive management | Not at risk                                                                                                                                                             |
| Provençale (PVC, n=18) |        | Indigenous breed of Provence registered since the 19 <sup>th</sup> century ( <a href="https://www.racesdefrance.fr">https://www.racesdefrance.fr</a> ; Babo, 2000). | The cradle of the breed is located in the "Provence of hills" (Alpes de Haute Provence).<br><br>This breed was not transhumant.                                      | Large size<br>large long hanging ears<br>medium long hair,<br>heterogeneous coat color<br><br>Adaptation to scarce and dry pastures     | Milk                              | Endangered<br>This breed, which almost disappeared, was taken over in 1993 by a breeders' association ( <a href="http://www.capgenes.com">http://www.capgenes.com</a> ) |
| Pyréenne (PYR, n=25)   |        | Very old origin in the Pyrenees (Fournier, 2006).                                                                                                                   | Pyrenees - Atlantic to Ariège.                                                                                                                                       | Medium size<br>Long hair, dark coat                                                                                                     | Milk/meat                         | Endangered                                                                                                                                                              |

|                                 |       |                                                                                                                                                           |                                                                                                                                                                                                                                                                |                                                                                                                  |                                            |                                                                                                                                                                |
|---------------------------------|-------|-----------------------------------------------------------------------------------------------------------------------------------------------------------|----------------------------------------------------------------------------------------------------------------------------------------------------------------------------------------------------------------------------------------------------------------|------------------------------------------------------------------------------------------------------------------|--------------------------------------------|----------------------------------------------------------------------------------------------------------------------------------------------------------------|
|                                 |       |                                                                                                                                                           | Transhumance in Pyrenean pastures (Fanica, 2008) some herds moved with the Pyrenean sheep across the Landes to Gironde and Dordogne.                                                                                                                           |                                                                                                                  | Extensive management                       | It almost disappeared in the second half of the 20 <sup>th</sup> century ( <a href="https://www.chevredespyrenees.org">https://www.chevredespyrenees.org</a> ) |
| Bermeya (BEY, n=24)             | Spain | Indigenous breed of the North of Spain, probably descending from <i>Capra aegagrus</i> ( <a href="https://www.mapa.gob.es">https://www.mapa.gob.es</a> ). | The southern part of the Principality of Asturias, in northern Spain.<br><br>Short transhumance (transtermitance).                                                                                                                                             | Medium size<br>Short hair, red coat<br><br>suitable for mountainous areas and humidity                           | Mainly meat and also milk                  | Endangered                                                                                                                                                     |
| Blanqua De Rasquera (RAS, n=20) |       | Municipal Ordinances of Vila de Rasquera (Tarragona) refers to the goat population in 1573 (Sabaté et al., 2011).                                         | Several regions in southern Catalonia (Baix Ebre, Ribera d'Ebre and Terra Alta), its name comes from the municipality of Rasquera, in the Ebro.<br><br>Horizontal transhumance to the Pyrenean pastures ( <a href="http://ipcite.cat">http://ipcite.cat</a> ). | Medium size<br>short hair, white coat with sometimes wide black spots<br>large, drooping ears<br><br>Hardy breed | Meat and also milk<br>Extensive management | Endangered                                                                                                                                                     |
| Malaguena (MLG, n=41)           |       | Certainly very old origin of the breed; there are traces of its existence that date back to the 4 <sup>th</sup> millennium BC (Garcia-Dory et al., 1990). | Malaga in the south of the Iberian Peninsula.                                                                                                                                                                                                                  | Medium size<br>Short hair, sandy to red coat, horns sometimes twisted                                            | Milk/meat                                  | Not at risk                                                                                                                                                    |
| Mallorquina (MAL, n=20)         |       | Ancient breed that was introduced to the island around 2500/1400 BC (Segui et al., 2005).                                                                 | Majorca, mainly in the mountains: Sierra de tramuntana and Sierra de Llevant.                                                                                                                                                                                  | Medium size<br>Short hair, red or red and black coat<br><br>Adaptation to scarce, dry and rugged areas           | Meat<br>Extensive management               | Endangered                                                                                                                                                     |



| Sheep Breeds (code)            | country | Origin/History                                                                                                                                                                                                                                                 | Cradle of the breed/transhumant area if practiced in the past and/or today                                                                                                                                                       | description                                                                                                                                                                 |                                   | status      |
|--------------------------------|---------|----------------------------------------------------------------------------------------------------------------------------------------------------------------------------------------------------------------------------------------------------------------|----------------------------------------------------------------------------------------------------------------------------------------------------------------------------------------------------------------------------------|-----------------------------------------------------------------------------------------------------------------------------------------------------------------------------|-----------------------------------|-------------|
| Manech Tête Rousse (MTR, n=25) | France  | Very ancient Basque origin ( <a href="https://www.races-montagnes.com">https://www.races-montagnes.com</a> ; Babo, 2000).                                                                                                                                      | Basque hillsides (Basse Navarre, Basse Soule).<br><br>Transhumance in Pyrenean pasture.                                                                                                                                          | Medium size<br>White wool, red head, long lopping ears<br><br>Ability to breed out of season<br>Hardy breed, good walker                                                    | Milk                              | Not at risk |
| Tarasconnaise (TAR, n=15)      |         | Very old breed derived from an original population of the Pyrenees ( <a href="https://www.races-montagnes.com">https://www.races-montagnes.com</a> ).                                                                                                          | Central Pyrenees and particularly in the Ariège, Hautes-Pyrénées and Haute-Garonne.<br><br>Transhumance in Pyrenean pasture.                                                                                                     | Medium size<br>White wool, spiral horns in males<br><br>Hardy breed, good walker, ability to breed out of season                                                            | Meat                              | Not at risk |
| Causse Du Lot (CDL, n=20)      |         | It is believed to come from a very old sheep strain that lived on the northern slope of the Garonne. Its origin goes back at least to the Gallo-Roman period ( <a href="https://www.races-montagnes.com">https://www.races-montagnes.com</a> ; Clozier, 1932). | Limestone plateaus of the Lot (the Causses of Quercy)<br><br>Horizontal transhumance linking the Lot to the Auvergne; winter transhumance was used during periods of extreme cold (Leveau, 2016; Clozier, 1932; Delhoume, 2005). | Medium to large size<br>White coarse wool, black spots around the eyes and ears<br><br>Hardy breed, it would be resistant to piroplasmiasis; ability to breed out of season | Meat/milk<br>Extensive management | Not at risk |
| Limousine (LIM, n=18)          |         | The breed would have emerged at the end of the 19 <sup>th</sup> century as a result of crossbreeding between different breeds of the Massif Central ( <a href="https://www.races-montagnes.com">https://www.races-montagnes.com</a> ).                         | Millevalches plateau, in the mid-mountain area.                                                                                                                                                                                  | Medium size<br>White medium wool<br><br>Adapted to a difficult territory with acid soil and harsh climate, ability to breed out of season                                   | Meat                              | Not at risk |

|                                                                     |                                                                                                                                                                                                                                                                                                     |                                                                                                                                             |                                                                                                                                                                                   |      |                                                                                                                                   |
|---------------------------------------------------------------------|-----------------------------------------------------------------------------------------------------------------------------------------------------------------------------------------------------------------------------------------------------------------------------------------------------|---------------------------------------------------------------------------------------------------------------------------------------------|-----------------------------------------------------------------------------------------------------------------------------------------------------------------------------------|------|-----------------------------------------------------------------------------------------------------------------------------------|
| Rava<br>(RAV, n=20)                                                 | Breed of the volcanic plateaus of Auvergne; it was first described in 1826 ( <a href="https://www.races-montagnes.com">https://www.races-montagnes.com</a> ).                                                                                                                                       | The Chaîne des Puys in the Massif Central.<br><br>Transhumance in the Massif Central.                                                       | Medium size<br>White coarse wool, black spots on the head<br><br>Adapted to a difficult territory with acid soil and harsh climate, ability to breed out of season                | Meat | Not at risk                                                                                                                       |
| Blanche Du Massif<br>(BMC, n=20)                                    | Old breed that belongs to the Causse group ( <a href="https://www.races-montagnes.com">https://www.races-montagnes.com</a> ).                                                                                                                                                                       | The Margeride in the South part of the Massif Central.<br><br>Horizontal transhumance linking the Languedoc to the Auvergne (Leveau, 2016). | Medium size<br>White wool<br><br>Adapted to a difficult territory, ability to breed out of season                                                                                 | Meat | Not at risk                                                                                                                       |
| Noire Du Velay<br>(NVE, n=19)                                       | Very old breed of Auvergne; it seems to have arrived in France around 1500 BC when the Celtic peoples settled in the Massif Central; writings mention its existence as early as the 17th century ( <a href="https://www.races-montagnes.com">https://www.races-montagnes.com</a> ; Brunelin, 2012). | Velay volcanic plateau, in the Auvergne region.<br><br>Horizontal transhumance linking the Languedoc to the Auvergne (Leveau, 2016).        | Medium size<br>black skin and wool of black-brownish colour<br><br>Good walker, adapted to a difficult territory with acid soil and harsh climate, ability to breed out of season | Meat | Not at risk<br>It almost disappeared at the beginning of the 20 <sup>th</sup> century with the arrival of better conformed breeds |
| Préalpes Du Sud<br>(PAS, n=17)                                      | It would be the result of the old mixing of the Sahune, Quint and Savournon breeds ( <a href="https://www.races-montagnes.com">https://www.races-montagnes.com</a> ; Duclos & Mallen, 1998).                                                                                                        | The Southern Alps at the border between the Dauphiné and Provence.<br><br>Transhumance in Alpine pastures.                                  | Medium size<br>White wool<br><br>Adaptation to dry mountain, ability to breed out of season                                                                                       | Meat | Not at risk                                                                                                                       |
| Mourerous, also called "La Rouge", "Péone" ou "Rouge de Guillaumes" | It could have been crossbred with breeds imported from North Africa ( <a href="https://www.races-montagnes.com">https://www.races-montagnes.com</a> ).                                                                                                                                              | Péone in the department of Alpes Maritimes.<br><br>Transhumance in Alpine pastures.                                                         | Medium size<br>White wool, red head and legs<br><br>Cold and drought resistance, ability to walk in the                                                                           | Meat | Not at risk<br>For a long time known as a "threatened" or "small breed"                                                           |

|                          |       |                                                                                                                                                                                                                |                                                                                                                                                                                                                                                                                              |                                                                                                                          |                                |             |
|--------------------------|-------|----------------------------------------------------------------------------------------------------------------------------------------------------------------------------------------------------------------|----------------------------------------------------------------------------------------------------------------------------------------------------------------------------------------------------------------------------------------------------------------------------------------------|--------------------------------------------------------------------------------------------------------------------------|--------------------------------|-------------|
| (MOUR, n=16)             |       |                                                                                                                                                                                                                |                                                                                                                                                                                                                                                                                              | mountain, ability to breed out of season                                                                                 |                                |             |
| Corse (COR, n=16)        |       | Ancestral breed of Corse; It would originate from a Pyrenean breed imported on the island several centuries ago ( <a href="https://www.races-montagnes.com">https://www.races-montagnes.com</a> ; Babo, 2000). | Mountainous areas of Corse.<br><br>Double transhumance between plains in winter and mountains in summer (Ravis-Giordani, 2001).                                                                                                                                                              | Medium size<br>Coarse wool, spiral horns in males<br><br>Adaptation to mountain pastures, ability to breed out of season | Milk                           | Not at risk |
| Delle Langhe (DEL, n=24) | Italy | Indigenous breed of the Piedmont (Porter, 2002).                                                                                                                                                               | The mountainous area of the Alta Langa in Piedmont (province of Cuneo), in northwestern Italy.<br><br>Transhumance in Alpine pasture (Caballero et al., 2009).                                                                                                                               | Medium to large size<br>White coarse wool, polled, semi lop hears<br><br>Adaptation to mountain pastures                 | Milk/meat                      | Endangered  |
| Biellese (BIE, n=21)     |       | Indigenous breed of the province of Biella in Piedmont (Porter, 2002).                                                                                                                                         | The province of Biella, in Piedmont in north-western Italy.<br><br>Transhumance in Alpine pasture, (Caballero et al., 2009, Battaglini 2014)<br>still practice vertical trasterminance (3/4 of total) between the mountains and the plain areas of Lombardy or Emilia Romagna (Corti, 2007). | Medium to large size<br>White coarse wool, polled, lop hears<br><br>Adaptation to mountain pastures                      | Meat and also wool in the past | Not at risk |
| Bergamasca (BER, n=24)   |       | Very ancient breed, we can trace its existence back to the 13 <sup>th</sup> century (Astori, 1963).                                                                                                            | The mountainous part of the province of Bergamo, in Lombardy in northern Italy.                                                                                                                                                                                                              | Medium to large size<br>White coarse wool, polled, lop hears                                                             | Meat                           | Not at risk |

|                         |  |                                                                                                                                                                                                                                                                                                                                                                                                           |                                                                                                                                                                                                      |                                                                                                        |                    |             |
|-------------------------|--|-----------------------------------------------------------------------------------------------------------------------------------------------------------------------------------------------------------------------------------------------------------------------------------------------------------------------------------------------------------------------------------------------------------|------------------------------------------------------------------------------------------------------------------------------------------------------------------------------------------------------|--------------------------------------------------------------------------------------------------------|--------------------|-------------|
|                         |  |                                                                                                                                                                                                                                                                                                                                                                                                           | Transhumance in Alpine pasture, (Caballero et al. 2009) still practice vertical trasterminance (3/4 of total) between the mountains and the plain areas of Lombardy or Emilia Romagna (Corti, 2007). | Adaptation to mountain pastures                                                                        |                    |             |
| Alpagota (ALP, n=24)    |  | Ancient breed, the sheep's emblem is found on the coat of arms of Chies d'Alpago (15 <sup>th</sup> century) (Pastore, 2005).                                                                                                                                                                                                                                                                              | The historic region of the Alpago in northern Italy<br><br>Transhumance in Alpine pasture (Caballero et al., 2009).                                                                                  | Small to medium-size white with dark spots, polled small ears<br><br>Adaptation to hills and mountains | Meat/milk          | Not at risk |
| Massese (MAS, n=24)     |  | Indigenous breed that belongs to the Apennine group, with an ancient origin: Machiavelli refers to the breed in his writings (early 16 <sup>th</sup> century).                                                                                                                                                                                                                                            | The Alpi Apuane mountains of the province of Massa Carrara, in Tuscany, central Italy.<br><br>Transhumance in the mountain pastures of Appennins (Caballero et al., 2009).                           | Small to medium size lead-grey to black<br><br>Adaptation to mountain pastures                         | Milk/meat          | Not at risk |
| Appenninica (APP, n=24) |  | The origin of the breed can be traced back to the end of the 19 <sup>th</sup> century, when sheep of the Bergamasque breed were imported into Tuscany, Umbria, Romagna, Marche and Abruzzo. These subjects were crossed with the pre-existing Apennine populations in order to intensify meat production ( <a href="http://biodiversita.umbria.parco3a.org">http://biodiversita.umbria.parco3a.org</a> ). | The central Apennine mountains of Italy.<br><br>Transhumance in the mountain pastures of Appennins and Abruzzo (Caballero et al., 2009).                                                             | Medium size<br>White, coarse wool, polled                                                              | Meat and also wool | Not at risk |

|                               |       |                                                                                                                                                                                                                                                  |                                                                                                                                                                                                                                                                            |                                                                                                                                                     |                    |                       |
|-------------------------------|-------|--------------------------------------------------------------------------------------------------------------------------------------------------------------------------------------------------------------------------------------------------|----------------------------------------------------------------------------------------------------------------------------------------------------------------------------------------------------------------------------------------------------------------------------|-----------------------------------------------------------------------------------------------------------------------------------------------------|--------------------|-----------------------|
| Laticauda (LAT, n=24)         |       | It should result from ancient hybridisation of local breeds with Barbary (or Barbarin) sheep of Maghrebi origin. The Bourbon king Charles VII of Naples could have brought it in the area (Bigi & Zannon 2008).                                  | Campania and Calabria, in southern Italy, in particular the provinces of Avellino, Benevento and Caserta.<br><br>This breed was not transhumant.                                                                                                                           | Medium to large size<br>Generally white, fat tail, polled                                                                                           | Milk/meat          | Unkonwn               |
| Bagnolese (BAG, n=23)         |       | A native campanian breed, that probably derives from the crossbreeding of the Barbaresca breed and the local breeds of the Appennines ( <a href="http://www.agraria.com">http://www.agraria.com</a> ).                                           | The area surrounding Bagnoli Irpino in the province of Avellino, in Campania in southern Italy.<br><br>Transhumance to the mountain pastures in summer.                                                                                                                    | Medium size<br>white fleece with dark spots, coarse wool, long hanging ears<br><br>Well adapted to pasture in rough conditions                      | Milk/meat          | Endangered-maintained |
| Valle Del Bellice (VAL, n=24) |       | It appears to result from the three-way hybridization of the Sicilian Pinzirita and Comisana breeds with Sarda stock brought from Sardinia (Porter, 2002).                                                                                       | The valley of the Belice river in south-western Sicily.                                                                                                                                                                                                                    | Medium size<br>White coat (Sarda), black coat (Sardinian black), long coarse wool                                                                   | Milk               | Not at risk           |
| Sardinian White (SAR, n=24)   |       | Indigenous to the island of Sardinia with very ancient origin ( <a href="http://www.agraria.com">http://www.agraria.com</a> ).                                                                                                                   | Mountains and plains of Sardinia.<br><br>Transhumance to mountain pastures.                                                                                                                                                                                                | Medium size<br>White coat long coarse wool                                                                                                          | Milk               | Not at risk           |
| Latxa (LATX, n=24)            | Spain | Basque breed called Manech in France, and one of the oldest breed in Spain. There are engravings dating back to 1872 that represent the breed ( <a href="https://www.mapa.gob.es">https://www.mapa.gob.es</a> , Porter 2002; Garcia-Dory, 1990). | the north-west of Navarre and in the east and south of the province of Guipúzcoa, in the north of Spain<br><br>Transhumance in Pyrenean pasture, (Caballero et al., 2009) still practice vertical trasterminance (3/4 of total) between the mountains and the plain areas. | Medium size<br>White long wool, the colour of the head depends on the variety, twisted horns in males<br><br>Adapted to rugged terrain and humidity | Milk and also meat | Not at risk           |

|                                 |                                                                                                                                                                                                                                |                                                   |                                                                                         |                             |                                                                                                             |
|---------------------------------|--------------------------------------------------------------------------------------------------------------------------------------------------------------------------------------------------------------------------------|---------------------------------------------------|-----------------------------------------------------------------------------------------|-----------------------------|-------------------------------------------------------------------------------------------------------------|
| Gallega<br>(GAL, n=27)          | Very ancient Galician breed, originary from <i>Ovis aries celtibericus</i> , it would go back 6,000 years (Garcia-Dory, 1990).                                                                                                 | South east of Galicia.                            | Small to medium size<br>White or black coat, spiral horns in males                      | Meat and also milk and wool | Unknown, according to FAO<br>Undangered, according to governmental Decret                                   |
| Churra<br>(CHU, n=30)           | Primitive Iberian breed, it comes from <i>Ovis aries celticus</i> and gives its name to the Churro trunk. Traces of its existence date back to pre-Roman times (Garcia-Dory, 1990).                                            | Zamora province in Castile and León.              | Medium size<br>White wool, head black spotted                                           | Milk/meat                   | Not at risk                                                                                                 |
| Ojalada<br>(OJA, n=24)          | Ancient breed that belongs to the Iberian Trunk, whose ancestral representative is the <i>Ovis aries ibericus</i> (Garcia-Dory, 1990).                                                                                         | The province of Soria in central Spain.           | Medium size<br>White wool, black spots around the eyes, sometimes spiral horns in males | Milk/meat/wool              | Not at risk according to FAO;<br>Endangered according to the website of the Spanish Ministry of Agriculture |
| Roja Mallorquina<br>(MAL, n=28) | Ancient breed, resulting from the crossing of two sheep trunks, one from the south of the European continent and the other from the North African countries ( <a href="https://www.mapa.gob.es">https://www.mapa.gob.es</a> ). | Island of Mallorca, especially the southern area. | Medium to large size<br>Red coat, fat triangular tail<br><br>Adapted to dryness         | Meat/wool                   | Endangered                                                                                                  |

## REFERENCES

- Astori, G. (1963). *La pecora Bergamasca. Ministero dell'Agricoltura e foreste*. Bergamo. 38p.
- Battaglini, M. (2014). Transumanza in Piemonte: un'opportunità multifunzionale? Studi sulla transumanza e l'alpeggio. *Ruralpini*, 1, 2-10.
- Bigi, D., Zanon, A. (2008). *Atlante delle razze autoctone: Bovini, equini, ovicaprini, suini allevati in Italia*. Milan: Edagricole. ISBN 9788850652594. p. 321–23.
- Brunelin, J.C. (2012). *La race Noire du Velay*. Association La Neira.

- Caballero, R., Fernández-González, F., Badia, R.P., Molle, G., Roggero, P.P., Bagella, S., D'Ottavio, P., Papanastasis, V.P., ...Ispikoudis, I. (2011). *Grazing systems and biodiversity in mediterranean areas: Spain, Italy and Greece*. Pastos.
- Clozier, R. (1932). L'économie du bétail sur les Causses du Quercy. *Bulletin de l'Association de Géographes Français*, 9, 165–171.
- Collantes, F. (2009). The Demise of European Mountain Pastoralism: Spain 1500–2000. *Nomadic People*, 13 (2), 124-145.
- Corti, M. (2006). *Risorse silvo-pastorali, conflitto sociale e sistema alimentare: il ruolo della capra nelle comunità alpine della Lombardia e delle aree limitrofe in età moderna e contemporanea*. In: SM Annali di, S.M. & Michele, S., 19, p. 235-340.
- Corti, M., Bruni, G., Oldrati, G. (1997). *La capra in provincia di Bergamo. Un allevamento che ritorna e guarda al futuro*. Provincia di Bergamo, Stampa Ferrari, Clusone.
- Daniel, B. (2000). *Races ovines et caprines françaises*, France Agricole Editions, coll. « Les Races », 302 p.
- Delhoume, J-P. (2005). *Histoire et géographie de l'élevage français, du Moyen Âge à la Révolution* Paris. Jean-Marc Moriceau, Fayard, 477 p.
- Duclos, J-C., Mallen, M. (1998). *Transhumance et biodiversité : du passé au présent*. In: Revue de géographie alpine, 86 (4), 89-10.
- Fanica, P-O. (2008). *Le lait, la vache et le citadin: du XVIIe au XXe siècle*, Editions Quae, 520 p.
- Fournier, A. (2006). *L'élevage des chèvres*, Editions Artemis, coll. « Élevage facile », 95 p.
- Leveau, P. (2016). *Approches de la transhumance en Gaule à l'époque romaine*. In: Rendu, C., Calastrenc, C., Le Couédic, M. & Berdoy, A. Estives d'Ossau. 7 000 ans de pastoralisme dans les Pyrénées, Éditions Le Pas d'Oiseau, p. 205-221, hal-01448268
- Pastore, E. (2005). *Le razze ovine autoctone del Veneto*. Veneto Agricoltura.
- Porter, V. (2002). *Mason's World Dictionary of Livestock Breeds, Types and Varieties*. CABI Publishing.
- Ravis-Giordani, G. (2001). *Bergers corses : les communautés villageoises du Niolu*. Ajaccio, Albiana-Parc naturel régional de Corse, 505 p.
- Rodríguez, M. F., Fernández, M. G., Bermejo, J. V. D., Belmonte, S. A., & Cabras, M. J. (2009). *Guía de campo de las razas autóctonas españolas* (1st ed.). Madrid: Ministerio de Agricultura y Pesca, Alimentación y Medio Ambiente. Secretaría General Técnica.
- Rubino, R. (1993). *Goat breeds in Italy*. Animal Genetic Resources Info.
- Sabaté, J., Caballero, M., Salinero, P., Valenzuela, S., Casanova, P. (2011). Extensa tipología cornual en la raza caprina “Blanca de Rasquera”. *PR: Pequeños Rumiantes*, 12 (2).

Seguí, B. (2005). *La cabra salvaje mallorquina: origen, genética, morfología*. Notas ecológicas e implicaciones taxonómicas, 31.

Talenti, A., Bertolini, F., Pagnacco, G., Pilla, F., Ajmone-Marsan, P., Rothschild, M. F., ... Italian Goat Consortium. (2017). The Valdostana goat: a genome-wide investigation of the distinctiveness of its selective sweep regions. *Mammalian Genome: Official Journal of the International Mammalian Genome Society*, 28(3–4), 114–128. doi: 10.1007/s00335-017-9678-7



a)

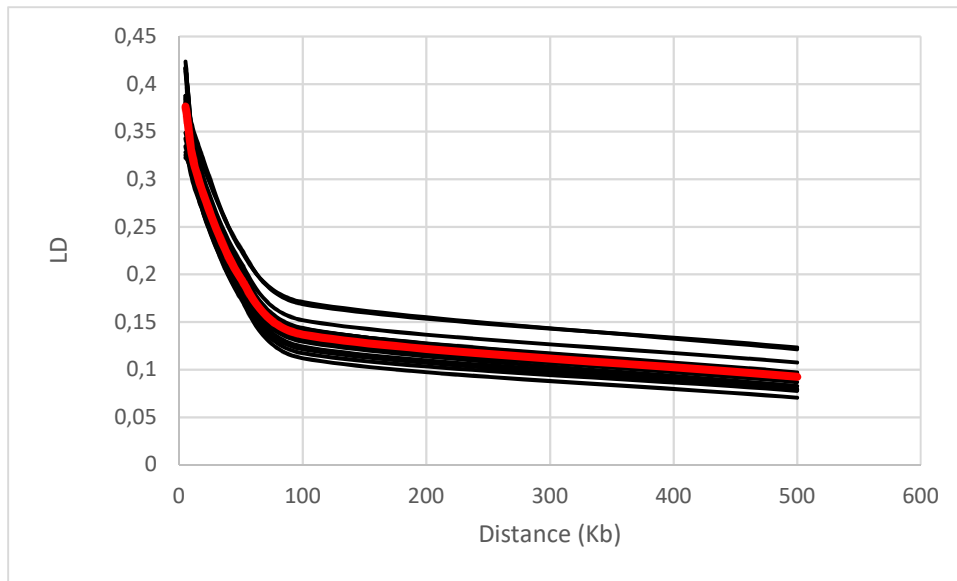

Mean LD for sheep in red: 5Kb=0.37 ; 15Kb=0.30 ; 50Kb=0.19 ; 100Kb=0.13 ; 500Kb=0.09

b)

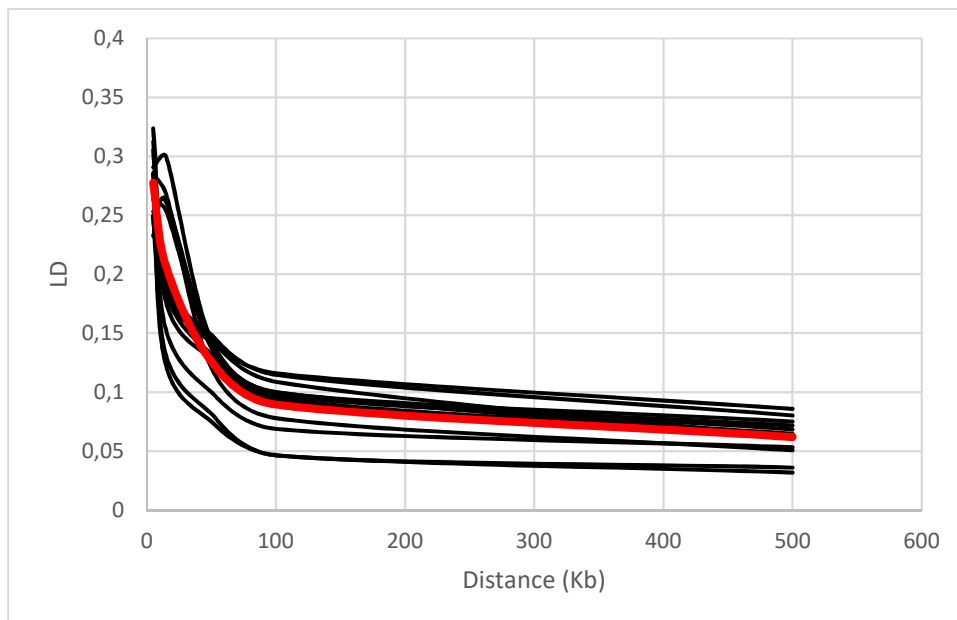

Mean LD for goat in red: 5Kb=0.28 ; 15Kb=0.21 ; 50Kb=0.13 ; 100Kb=0.09 ; 500Kb=0.06

## Supplementary Figure 2

## Supplementary Text 1

### Genetic relationships between the Mediterranean goat breeds

For K=2 (Figure 1), the admixture analysis reveals a gradient that follows the geographical disposition of the goat breeds along the Mediterranean arc. Spanish breeds show a predominance of orange; the proportion of orange gradually decreases to give place to a dominant blue within the breeds of southern Italy. At K=3, the Italian DIT breed is individualized from GGT, then at K=4 it is the alpine ORO breed that stands out. At K=6, the proximity of the Spanish breeds is obvious, with a clear link between BEY and PYR, the breeds close to the Pyrenees, respectively Spanish and French. In the Italian group, the VAL and GAR breeds show their originality. At K=17, all breeds are individualized, with the exception of alpine breeds, BIO and VSS, which remain very close, as well as breeds from southern Italy, CCG, NIC and ARG.

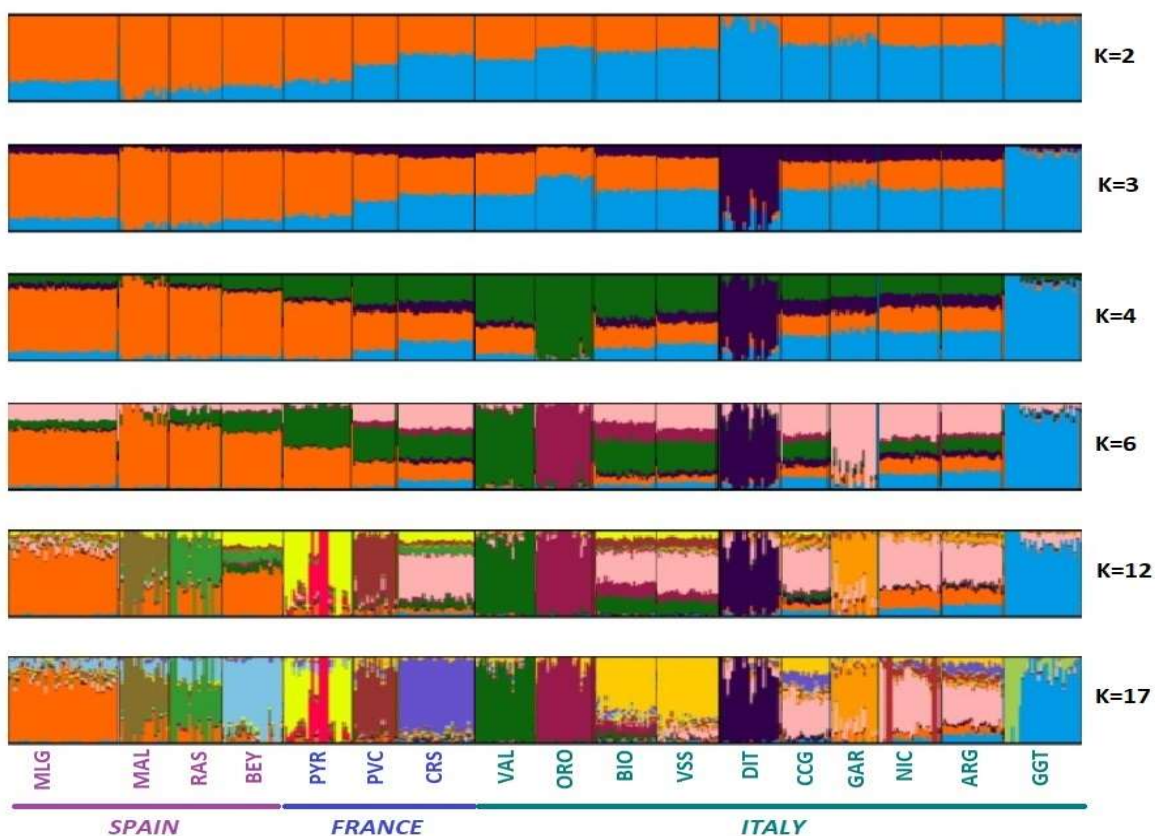

Figure 1. Bayesian clustering performed with ADMIXTURE software on Mediterranean goat breeds. K = number of clusters; see the correspondence between breed names and codes in Supplementary table 1.

## Genetic relationships between the Mediterranean sheep breeds

For  $K=2$  (Figure 2), the major contrast is established between the Italian Alpine breeds BIE, BER, ALP and the others. Within the Spanish group, the MAL breed is very clearly individualized from  $K=8$ . The Spanish Pyrenean breed LATX shows a strong proximity with the French MTR, also Pyrenean, and this even for  $K=25$ . As for the French breeds, the first to individualize are LIM, CDL and COR. At  $K=25$ , a clear link between PAS, MOUR and NVE is maintained. The Italian breeds, DEL, then SAR, VAL and MAS, are individualized between  $K=4$  and  $K=8$ . At  $K=25$ , the analysis shows a very strong proximity between BIE and BER, as well as a persistent link between LAT and BAG.

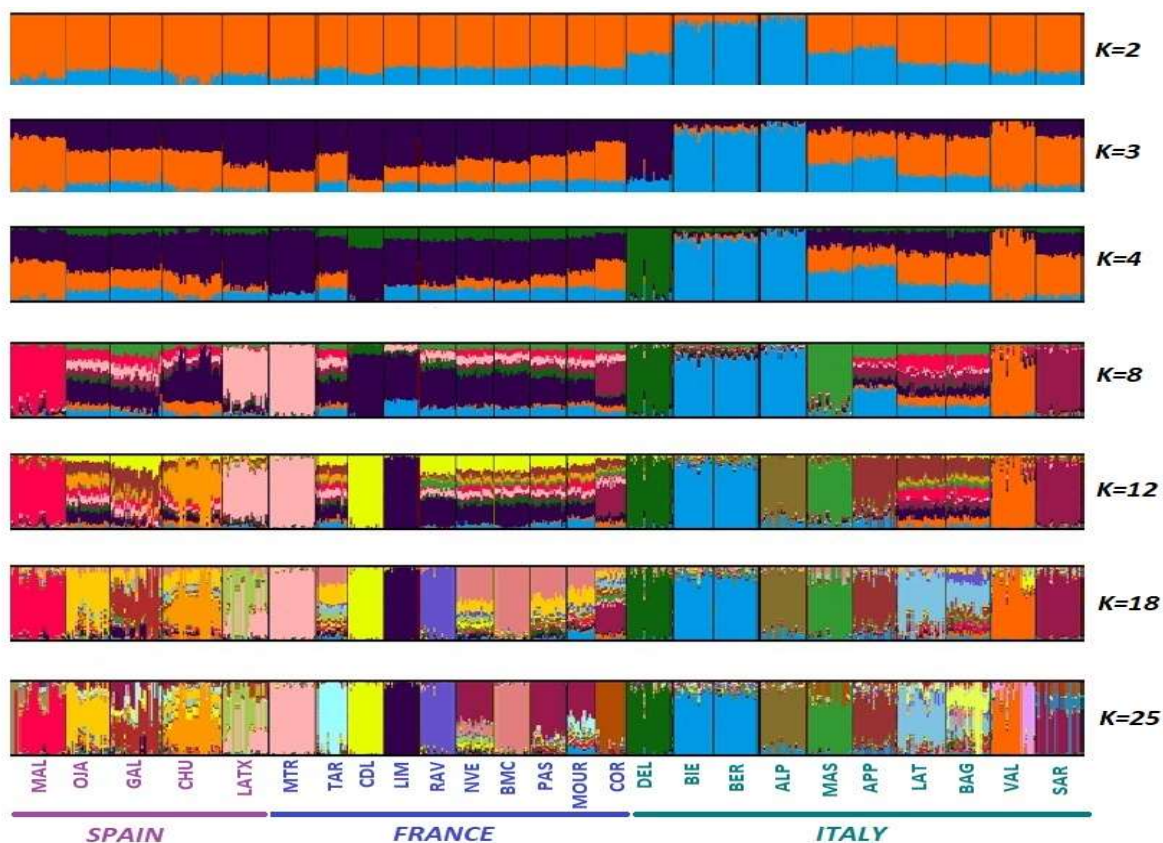

Figure 2. Bayesian clustering performed with ADMIXTURE software on Mediterranean sheep breeds.  $K$  = number of clusters; see the correspondence between breed names and codes in Supplementary table 1.

## K choice

For both goats and sheep (Figure 3), the cross-entropy curve decreases as K increases, which is characteristic of a distance isolation pattern (François, 2016). A plateau reached at K=10 for goats and K=9 for sheep, indicating that fine structuring could be apparent from this threshold. In sheep, a dropout at K=3 could be the reflection of an under-structuring by country.

The Mantel tests showed correspondence between geographic and genetic distances ( $p$ -value = 0.049 for goats and 0.001 for sheep), supporting the Isolation By Distance (IBD) pattern.

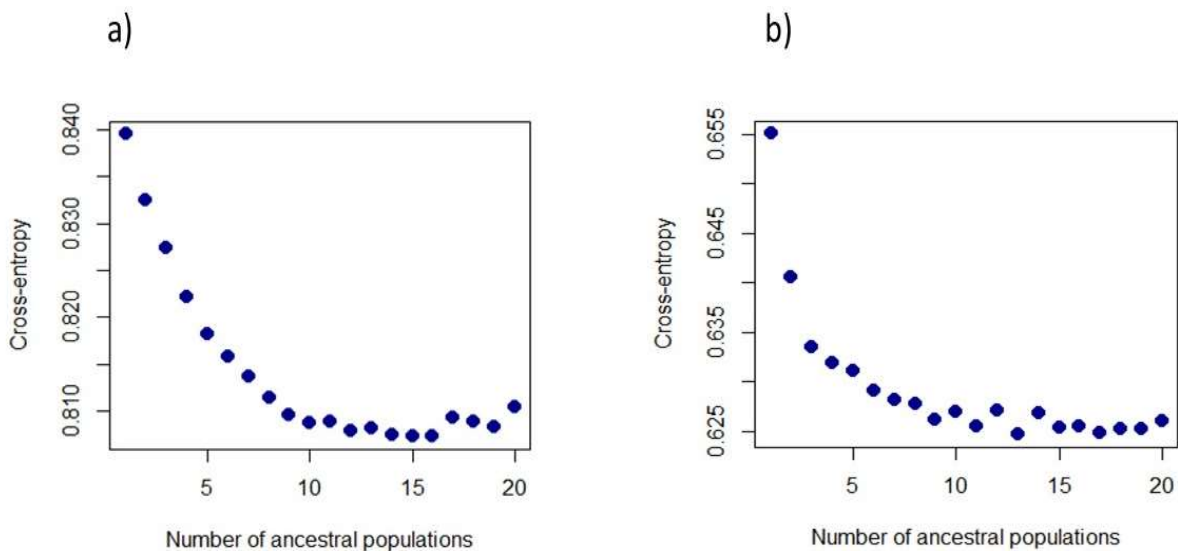

Figure 3. Cross-entropy plot for the number of cluster K = 1-20, considering: a) the goat dataset and b) the sheep dataset.

## Bibliography

François O. (2016). *Running Structure-like Population Genetic Analyses with R*. R Tutorials in Population Genetics, U. Grenoble-Alpes, pages 1-9.

## Supplementary Text 2

### Environmental characterization: comparison between GPS and cradle methods

For eight French sheep breeds (Rava, Limousine, Causse Du Lot, Tarasconnaise, Noire Du Velay, Préalpes Du Sud, Mourerous and Blanche Du Massif Central) we could compare Mean Annual Precipitation, Mean Annual Temperature and Altitude obtained via the GPS area method and the cradle method. Multiple comparisons with FDR adjusted p-values ( $\alpha=0.05$ ) were realized with R, using the package rstatix. The analysis (Figure 1) generated 21 comparisons. All differences between the GPS area and the cradle were significant except for the variable, Mean Annual Precipitation, for the breeds Causse du Lot (CDL) and Préalpes du Sud (PAS). Overall, significantly higher mean Altitude values were provided by the cradle method, which resulted in higher Mean Annual Precipitation and lower Mean Annual Temperatures, compared to that obtained by the GPS area method. The differences were particularly strong for transhumant breeds such as Rava (RAV), Tarasconnaise (TAR) and Mourerous (MOUR), for which GPS sampling had mainly been carried out on the plains.

For goats, we compared the same three environmental parameters obtained by the GPS area and the cradle methods for all 17 breeds, (Figure 2), which resulted in 45 out of 51 significant differences. As found for sheep, significantly higher mean Altitude was always found for the cradle method, and resulted in lower Mean Annual Temperature. The rainfall pattern was less clear-cut, with 56% of the comparisons showing higher Mean Annual Precipitation when extracted at the level of cradle of origin.

These analyses showed that the environmental characterization depends on the definition of the distribution range based on the cradle or on the individual/breed GPS coordinates. The cradle method takes into account summer grazing areas, which implies the extraction of climatic data at higher altitudes than with the GPS method, generally resulting in lower temperatures and higher precipitations. In addition, for some breeds such as Garganica (GAR) and Mourerous (MOUR), individuals were sampled more than 100 km from their established cradle, which led to the consideration of different climatic environments depending on the method used. These breeds illustrate the move of the herds from their cradle of origin, caused by the intensification of agricultural practices.

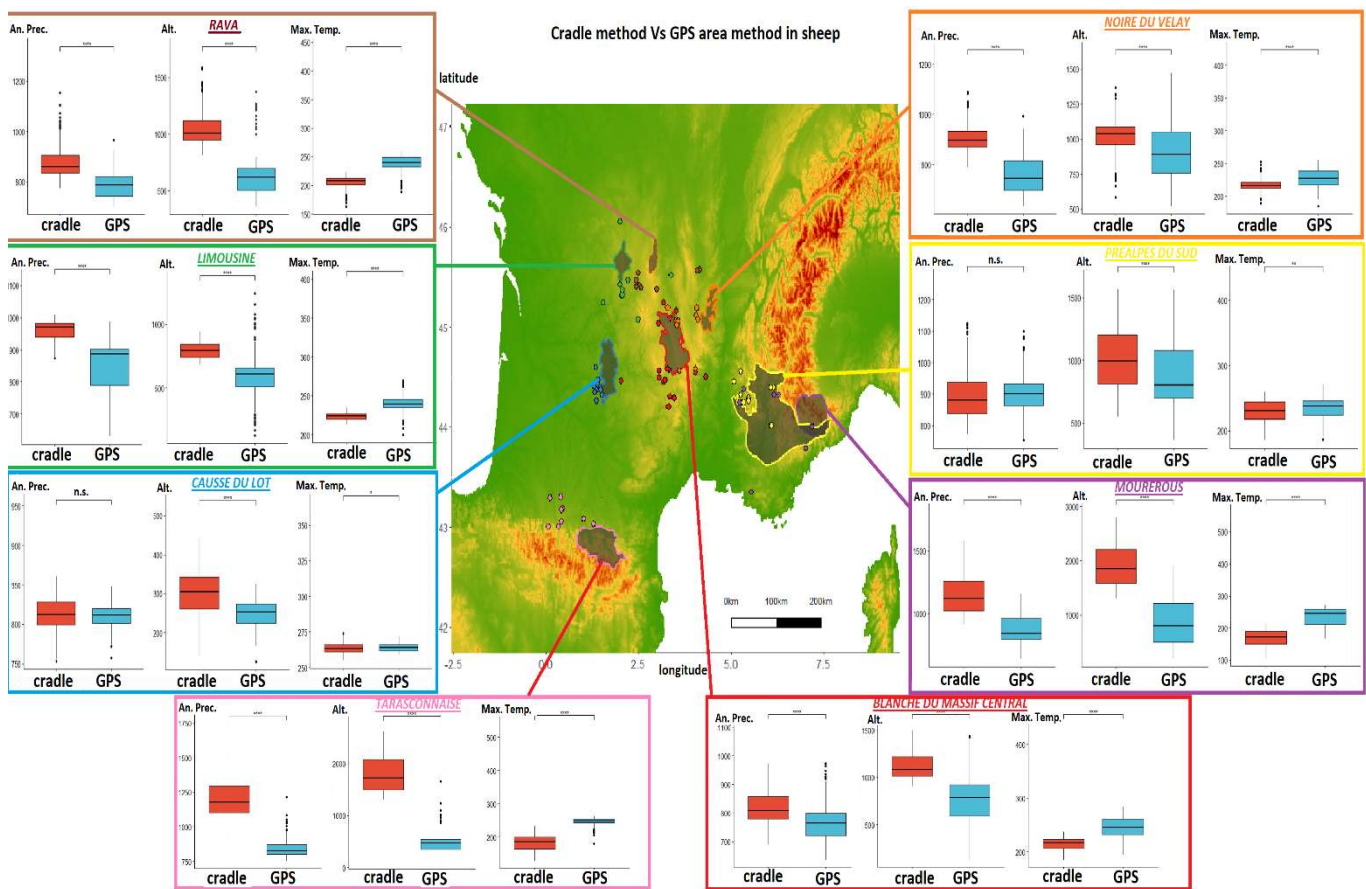

Figure 1. Mapping display for sheep of the geographical cradles and the GPS coordinates of the sampled points; statistical comparisons for the variables Annual Mean Temperature, Annual Mean Precipitation and Altitude between the distributions obtained by the cradle method and the GPS area method, display of the results via boxplots.

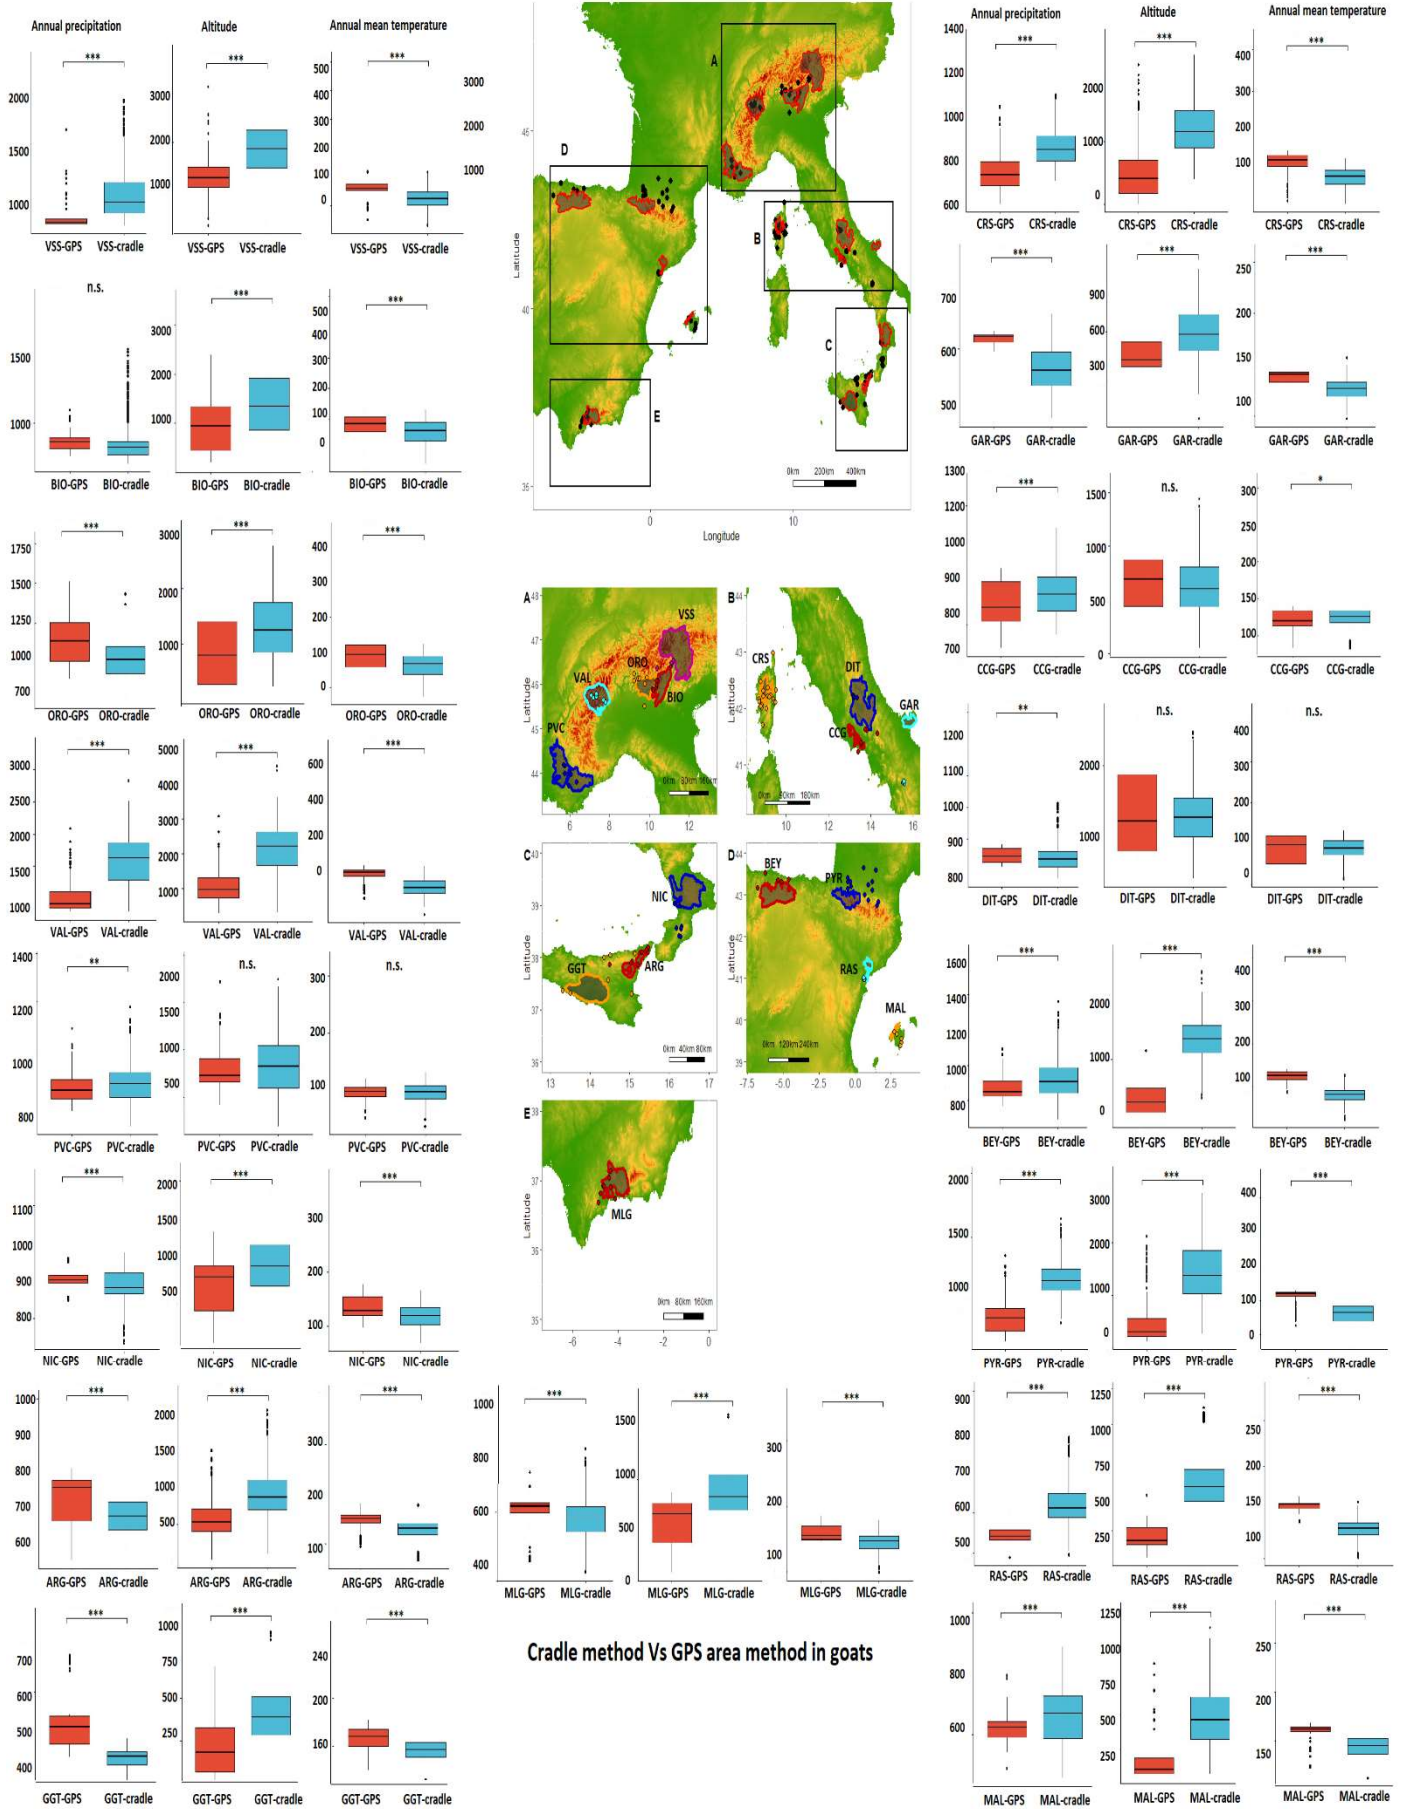

Figure 2. Mapping display for goat of the geographical cradles and the GPS coordinates of the sampled points; statistical comparisons for the variables Annual Mean Temperature, Annual Mean Precipitation and Altitude between the distributions obtained by the cradle method and the GPS area method, display of the results via boxplots.

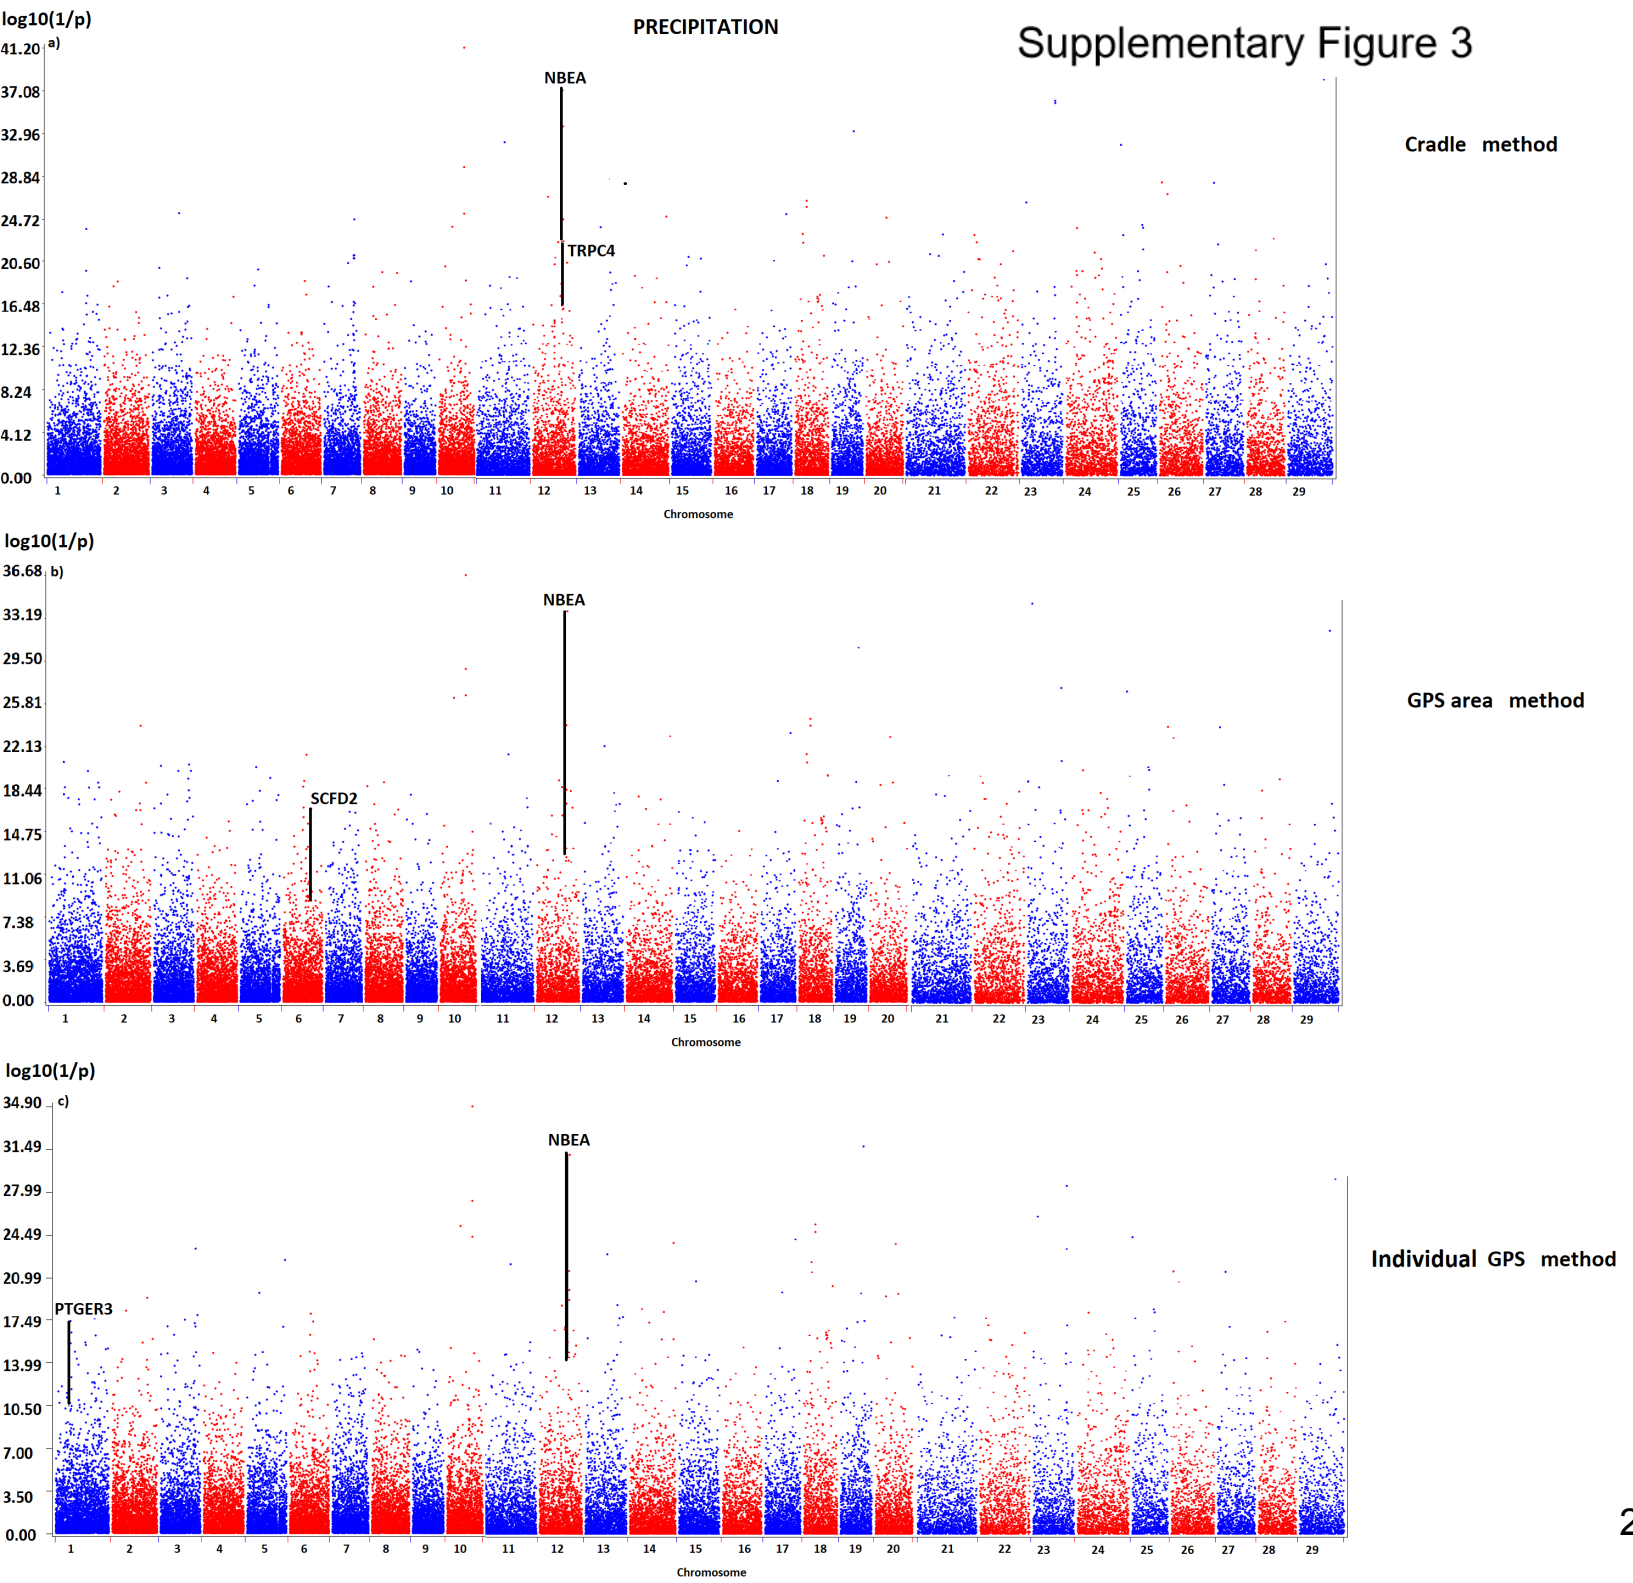



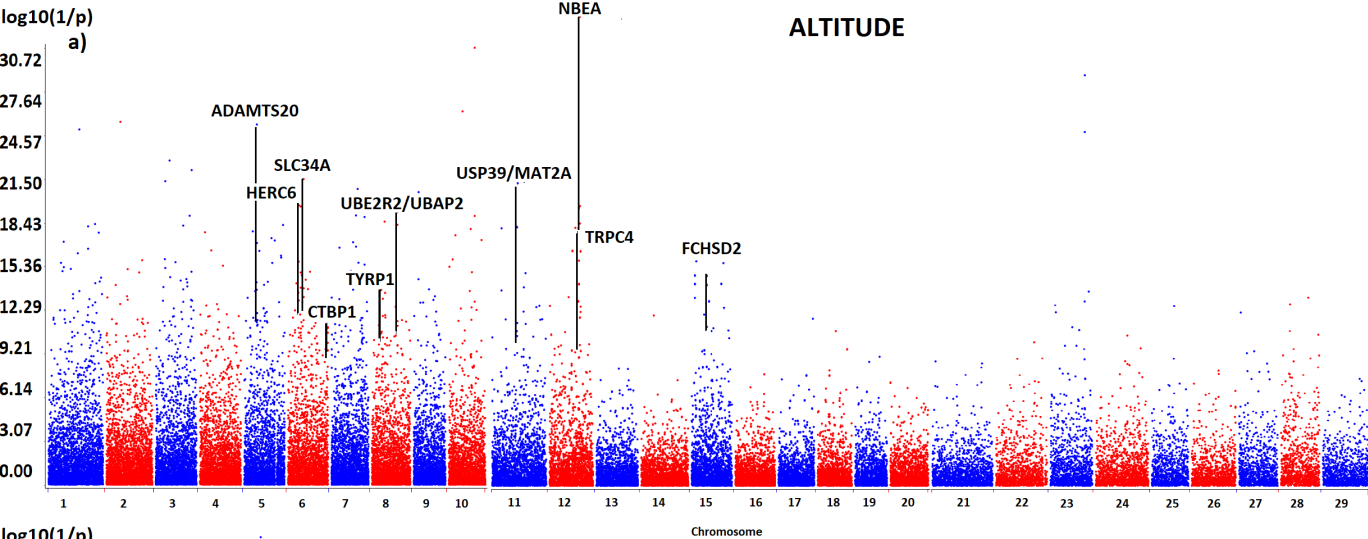

**Cradle method**

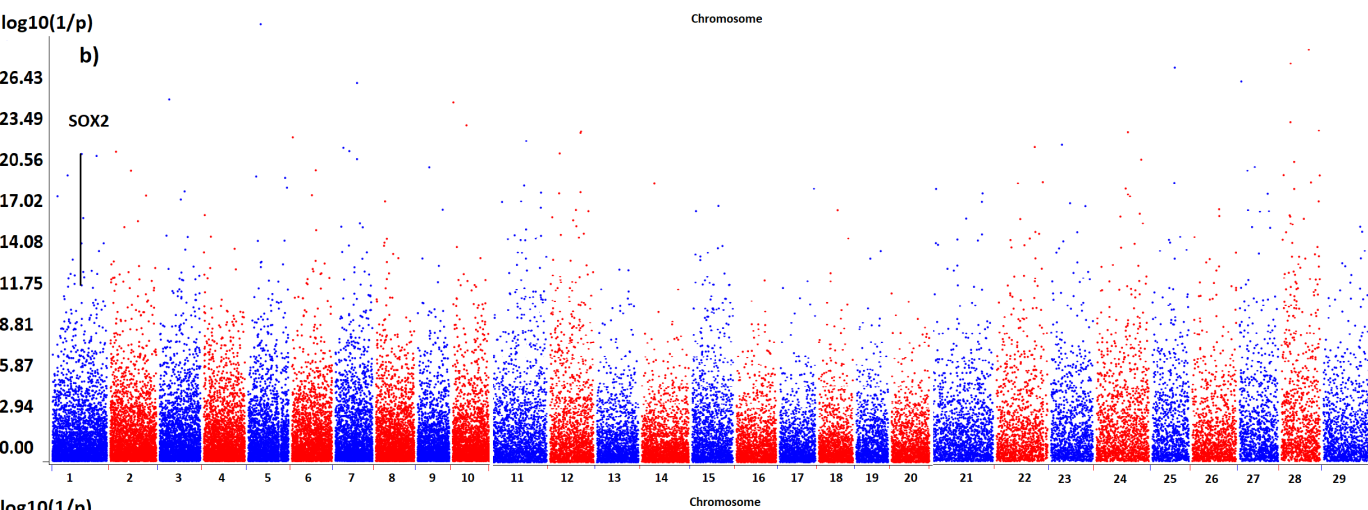

**GPS area method**

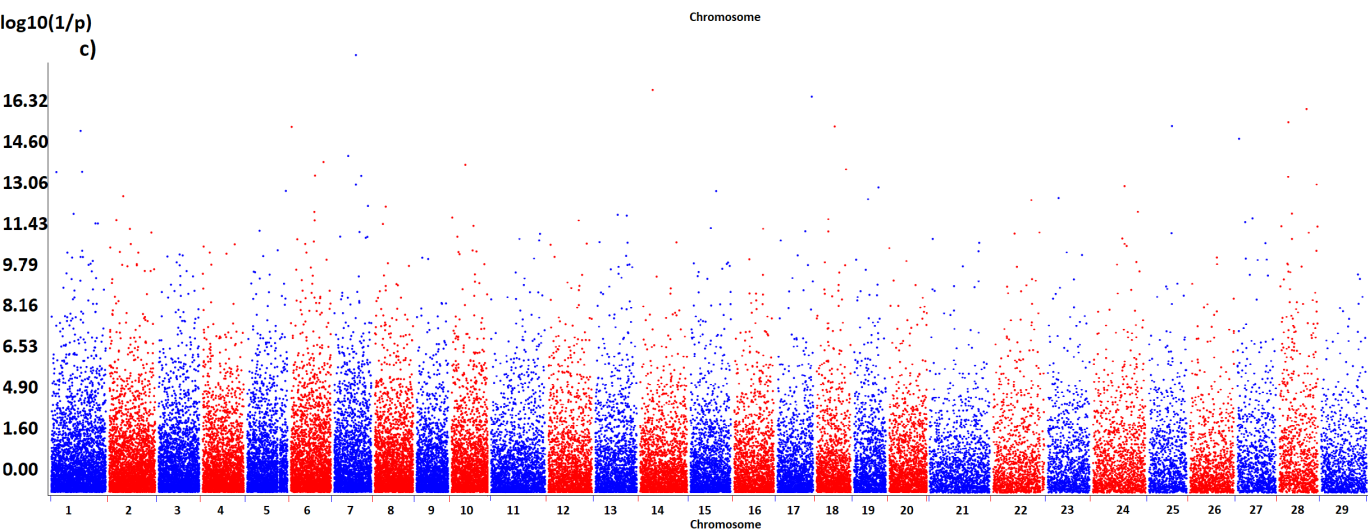

**Individual GPS method**

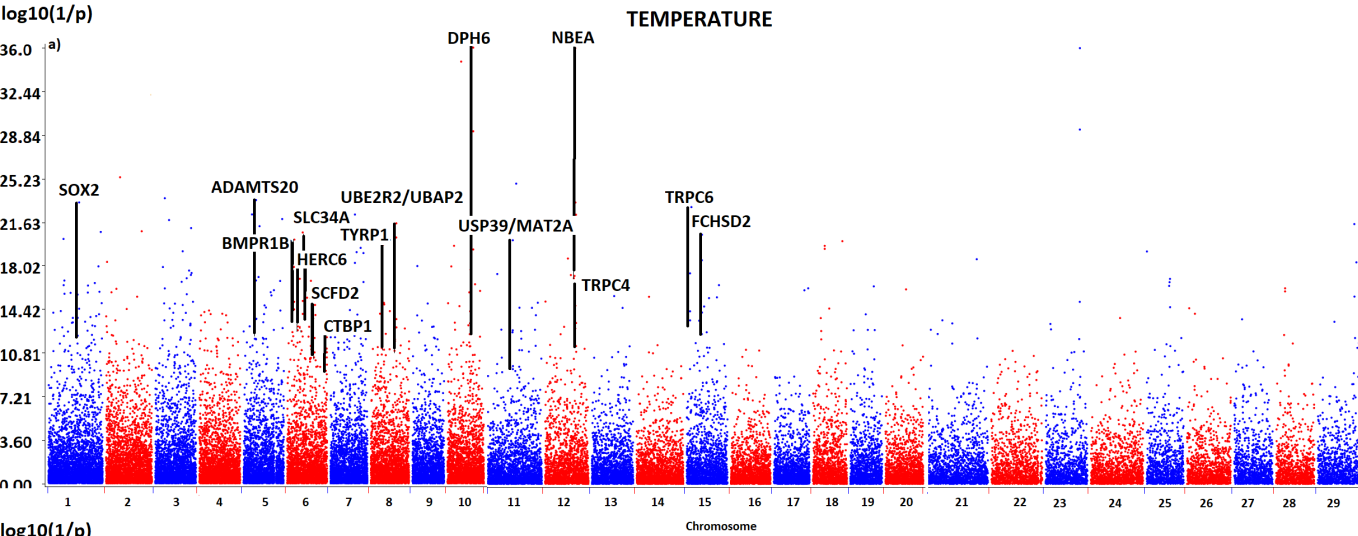

Cradle method

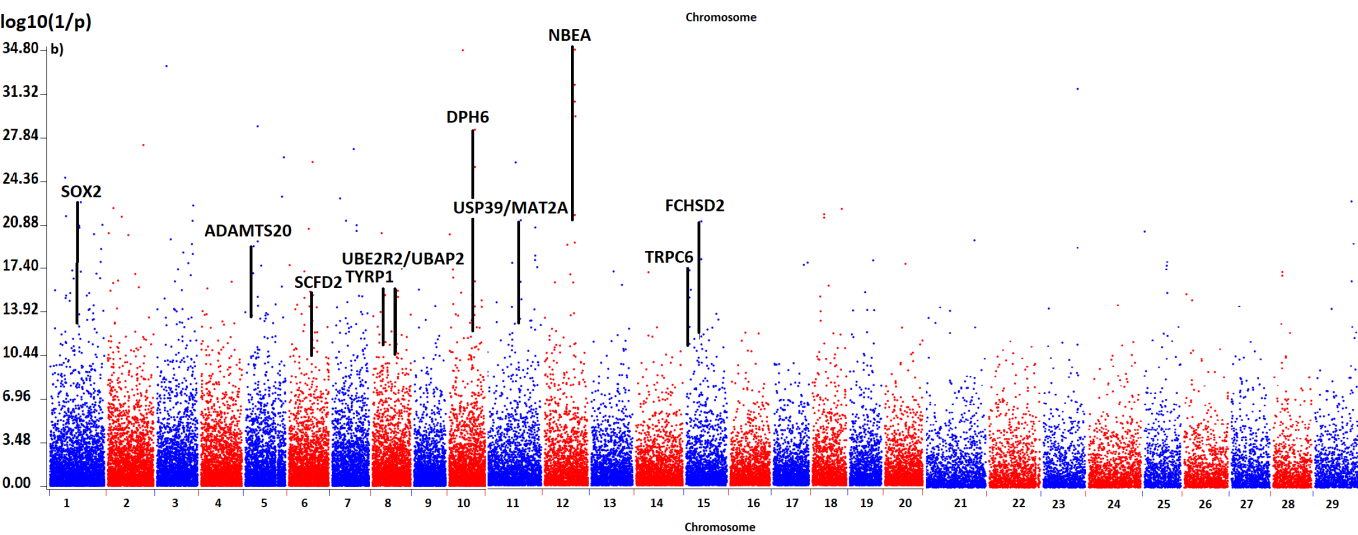

GPS area method

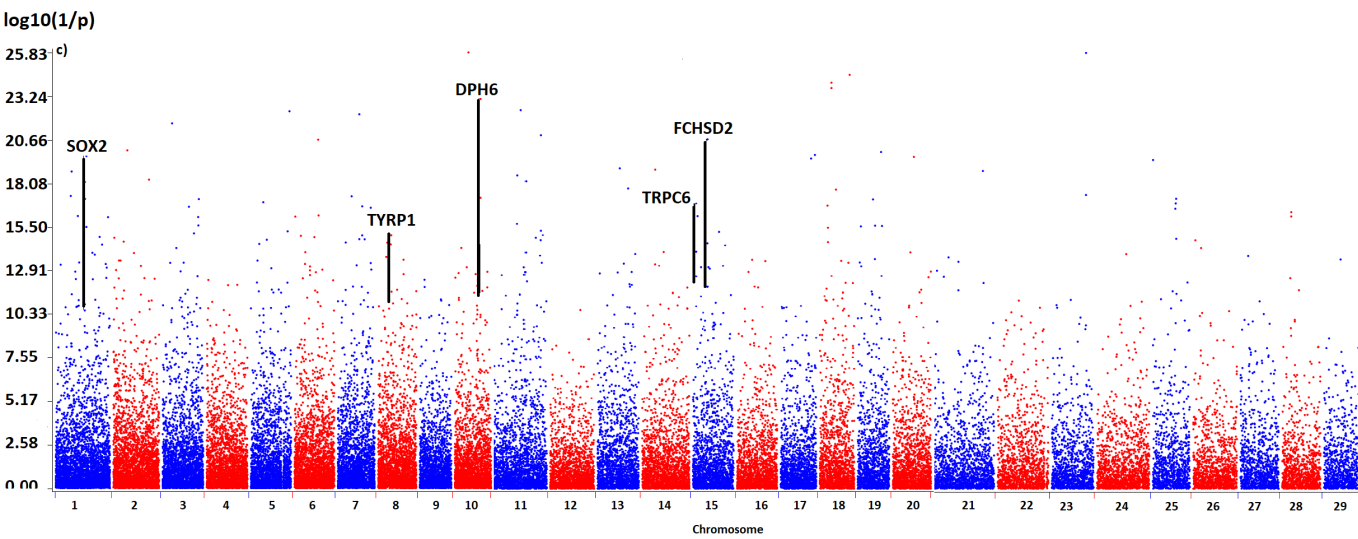

Individual GPS method

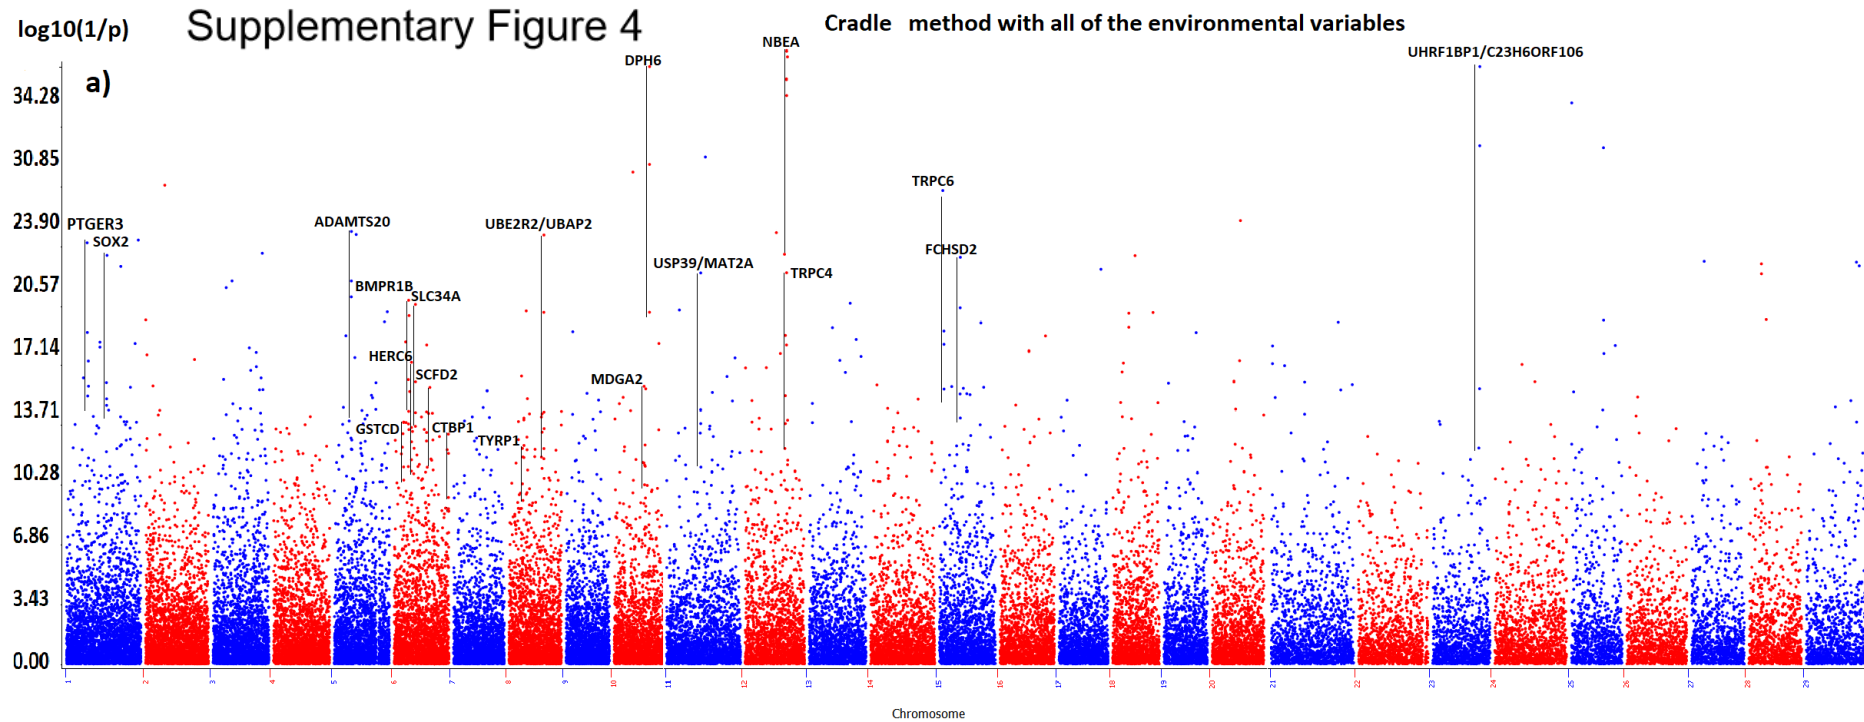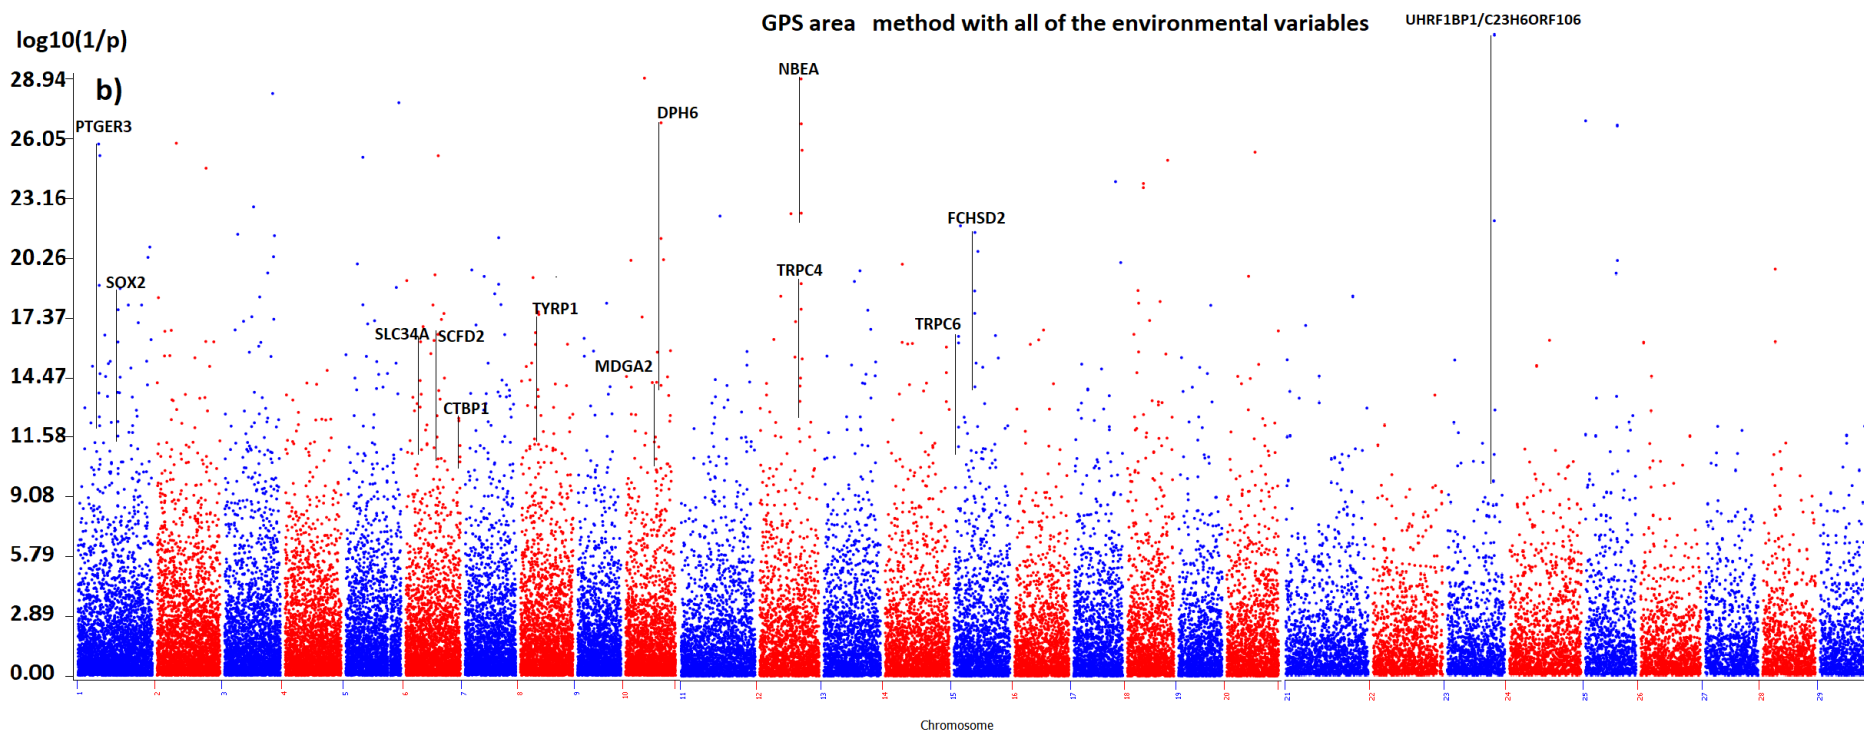

# Supplementary Figure 5

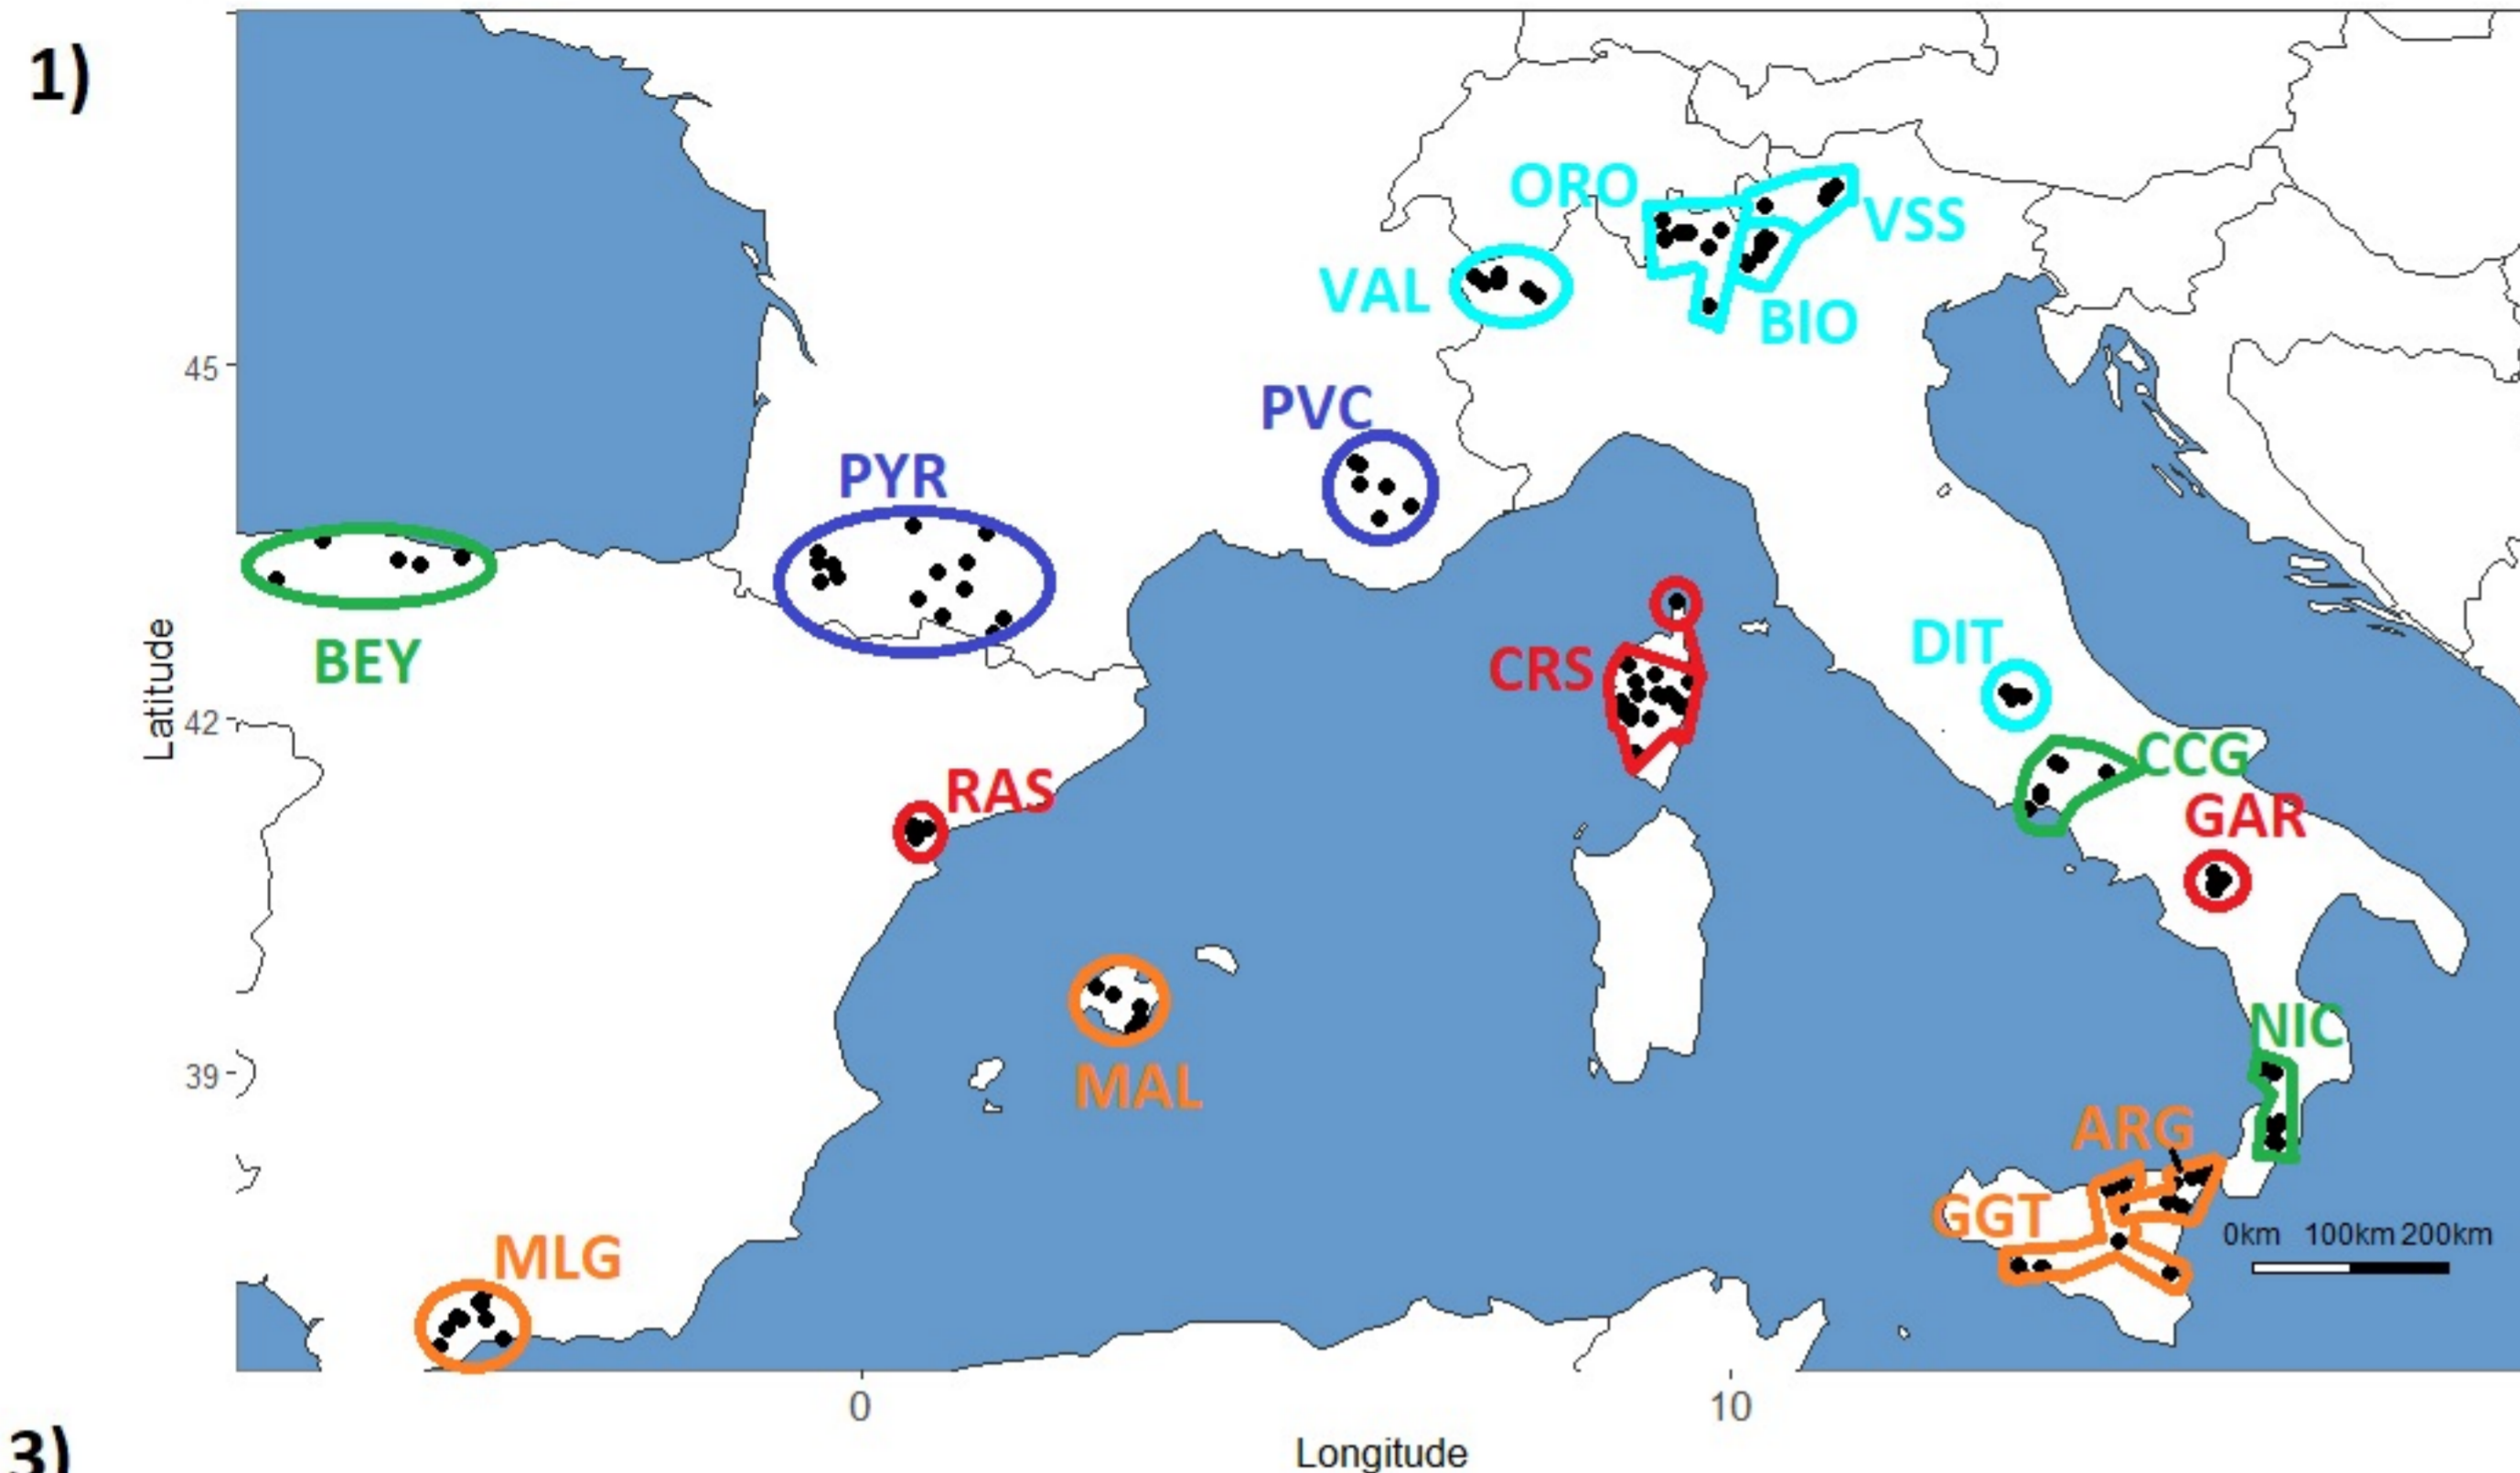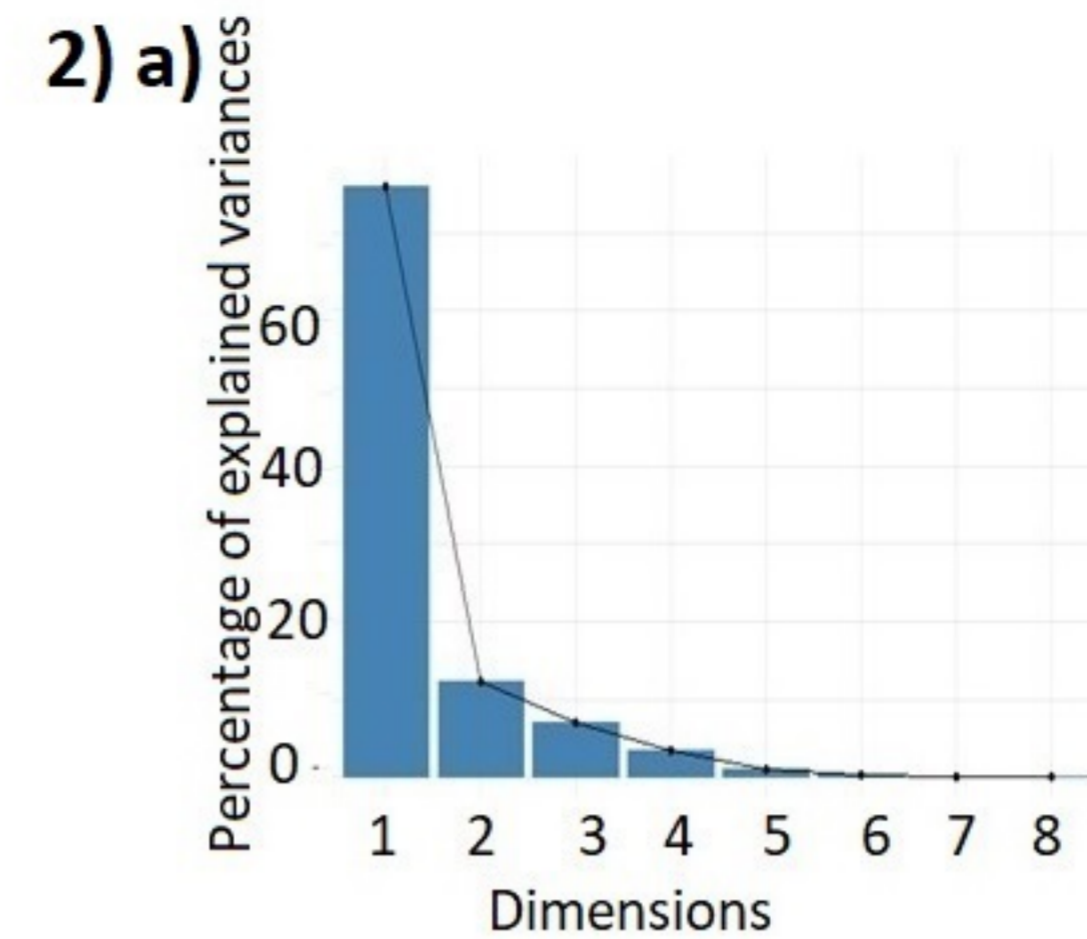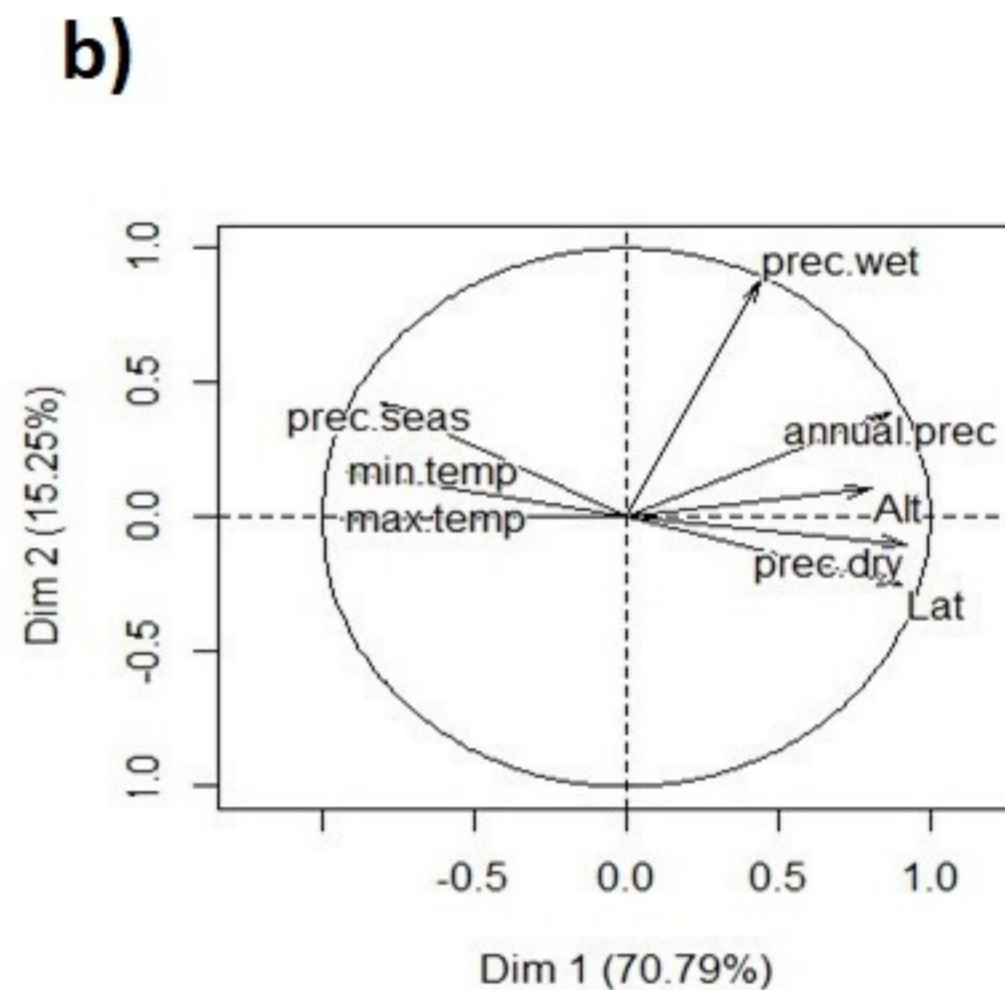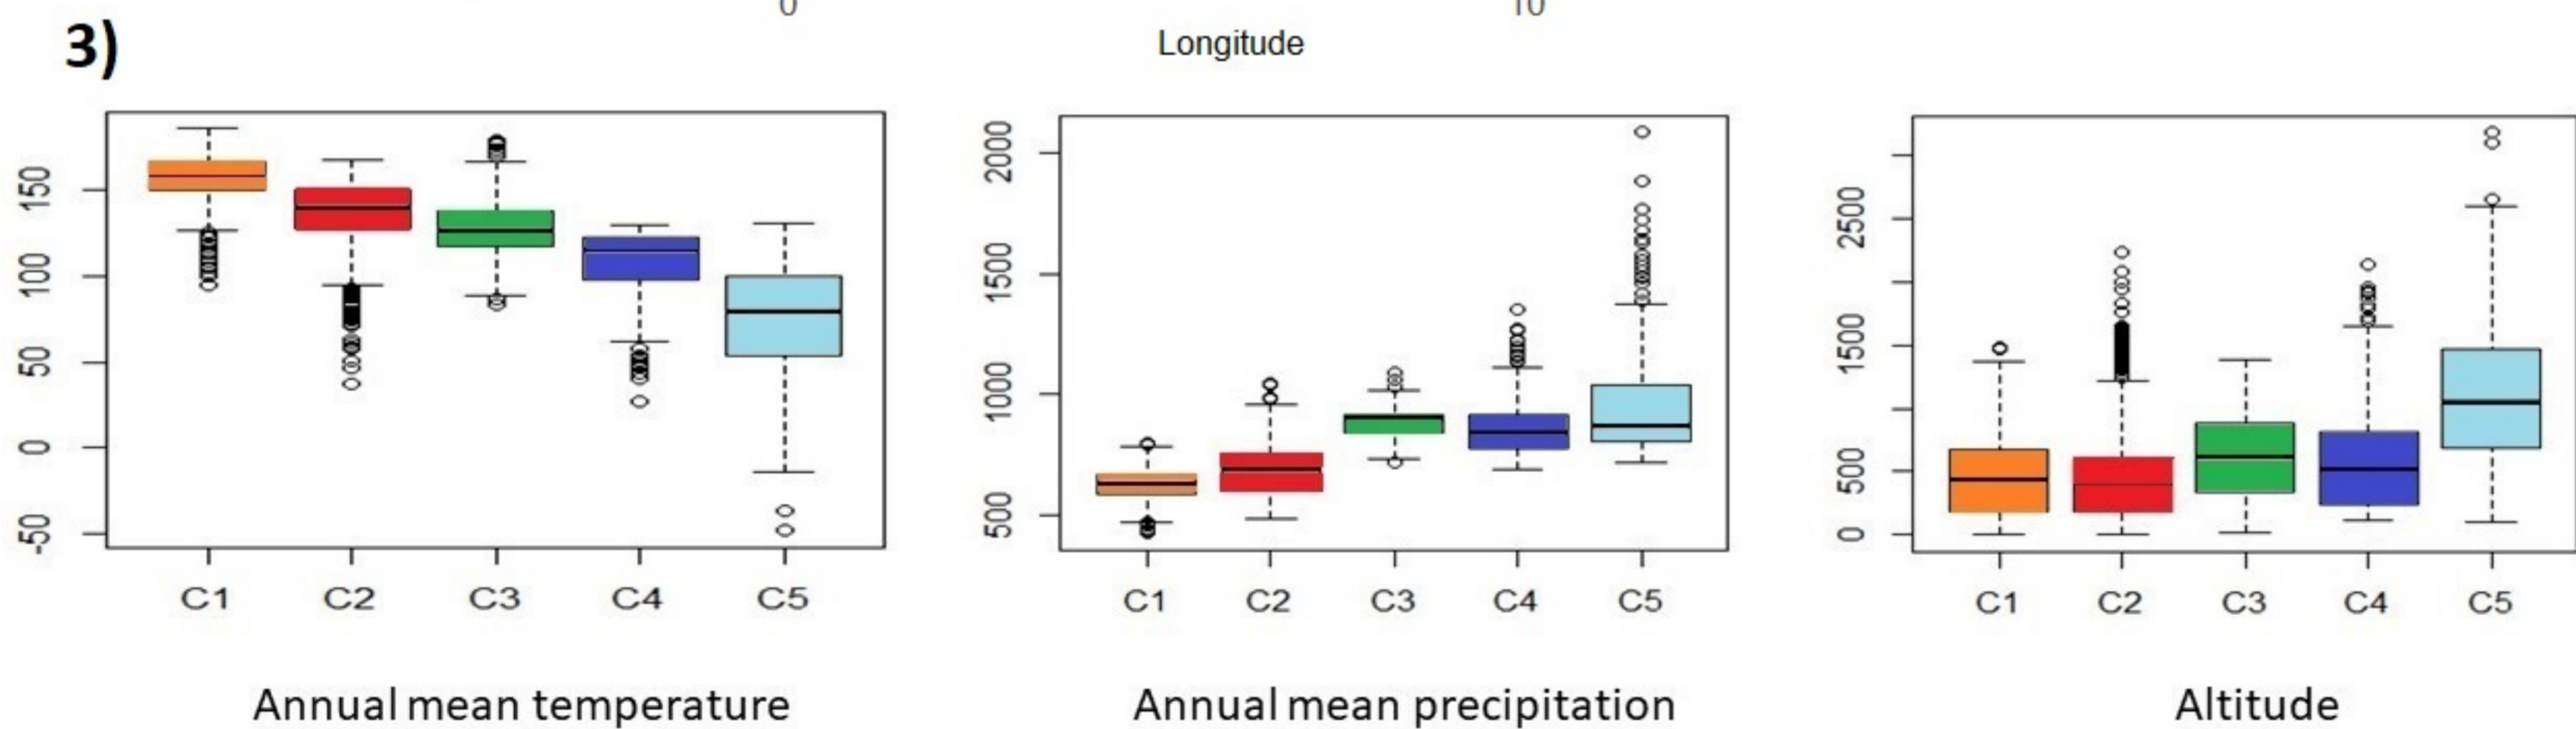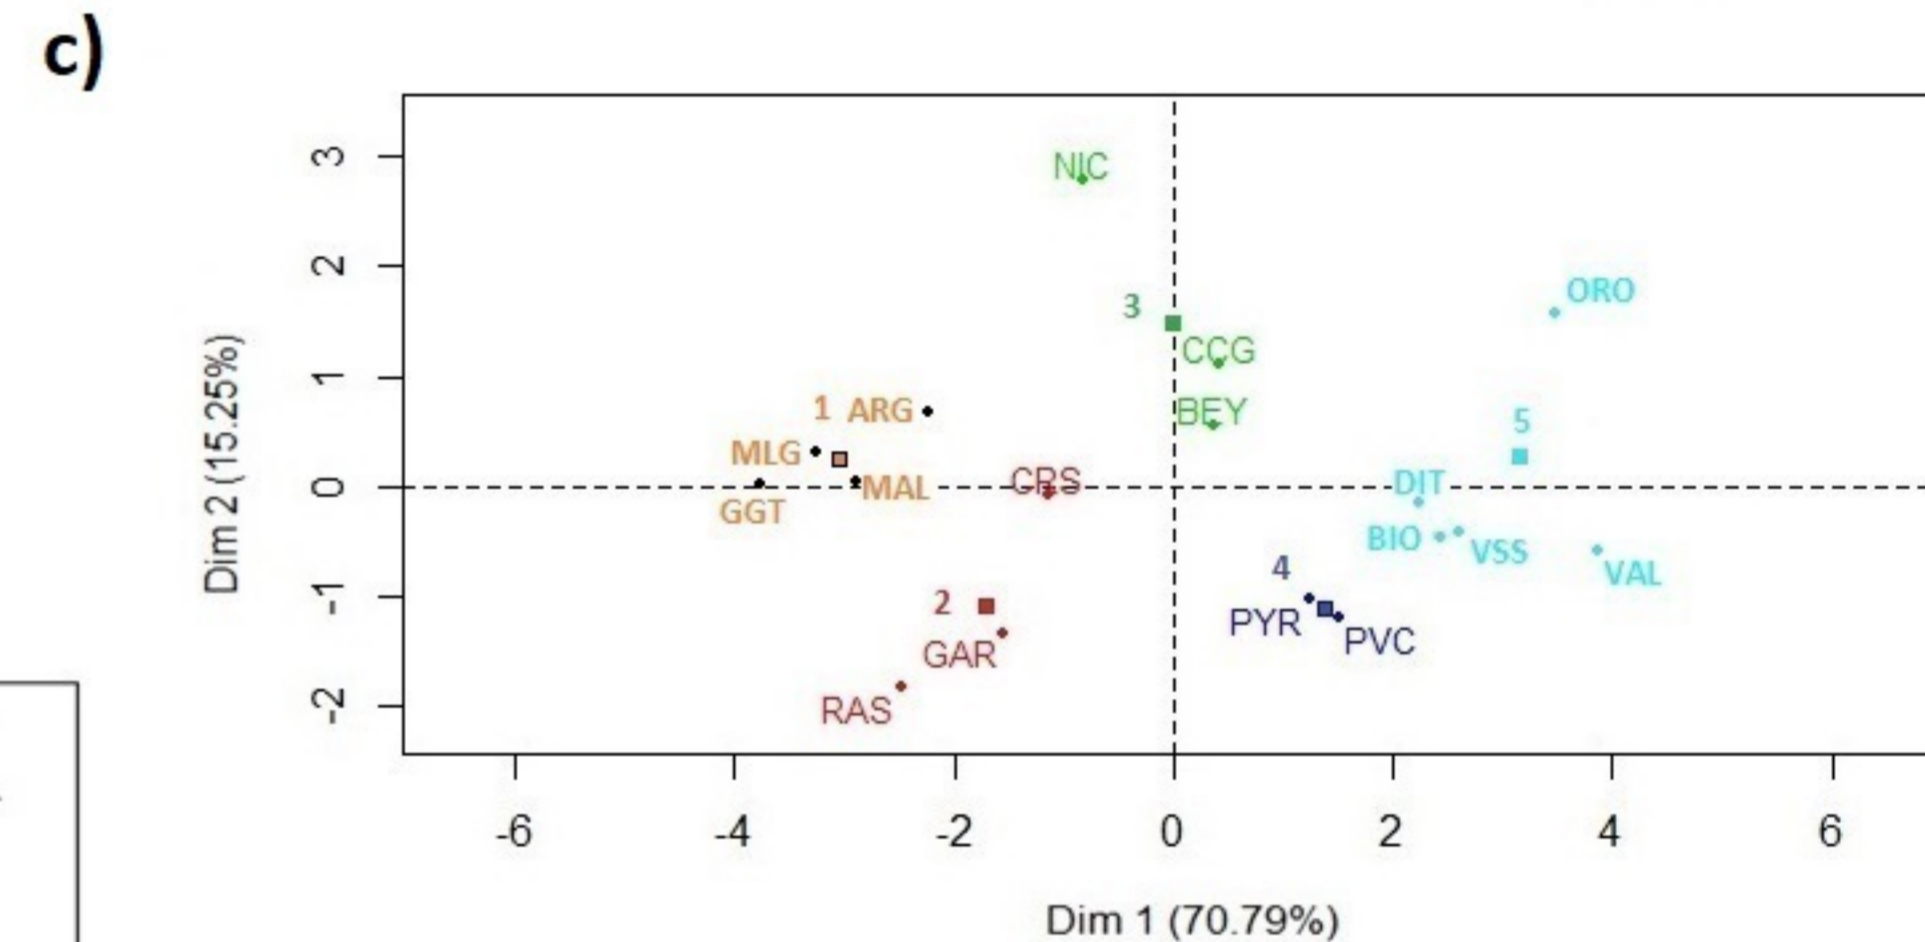

|      | C1    | C2    | C3    | C4    | C5   |
|------|-------|-------|-------|-------|------|
| mean | 156.9 | 133.1 | 128.5 | 107.6 | 81.9 |
| s.d. | 14.3  | 23.1  | 18.0  | 21.2  | 36.4 |

|      | C1    | C2    | C3    | C4    | C5    |
|------|-------|-------|-------|-------|-------|
| mean | 632.0 | 692.1 | 884.2 | 873.6 | 949.8 |
| s.d. | 84.7  | 102.4 | 62.3  | 121.9 | 180.5 |

|      | C1    | C2    | C3    | C4    | C5     |
|------|-------|-------|-------|-------|--------|
| mean | 444.3 | 485.3 | 614.6 | 578.0 | 1067.5 |
| s.d. | 287.1 | 426.7 | 326.6 | 448.1 | 631.8  |

# Supplementary Figure 6

a)

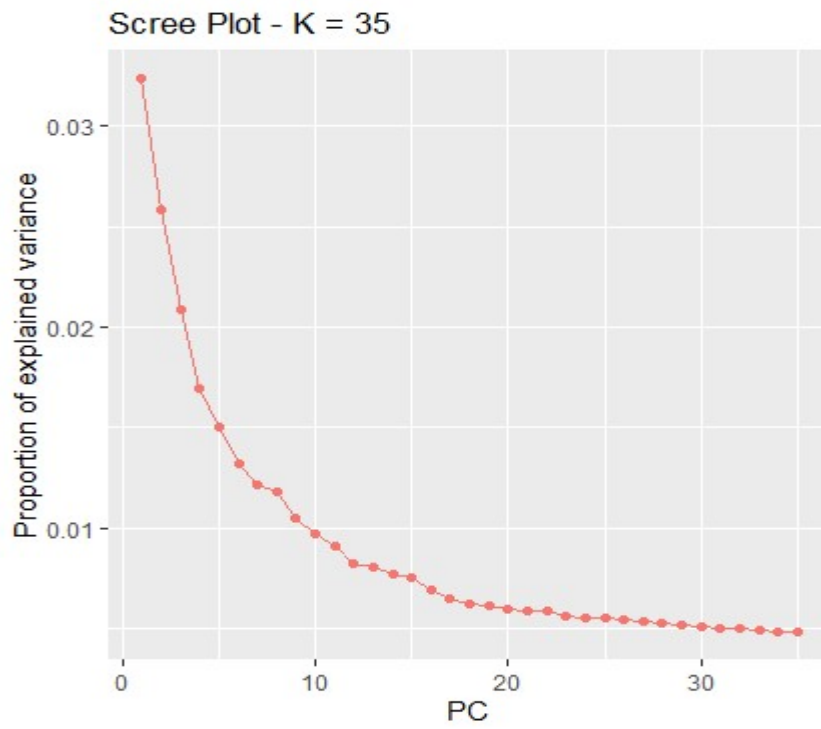

b)

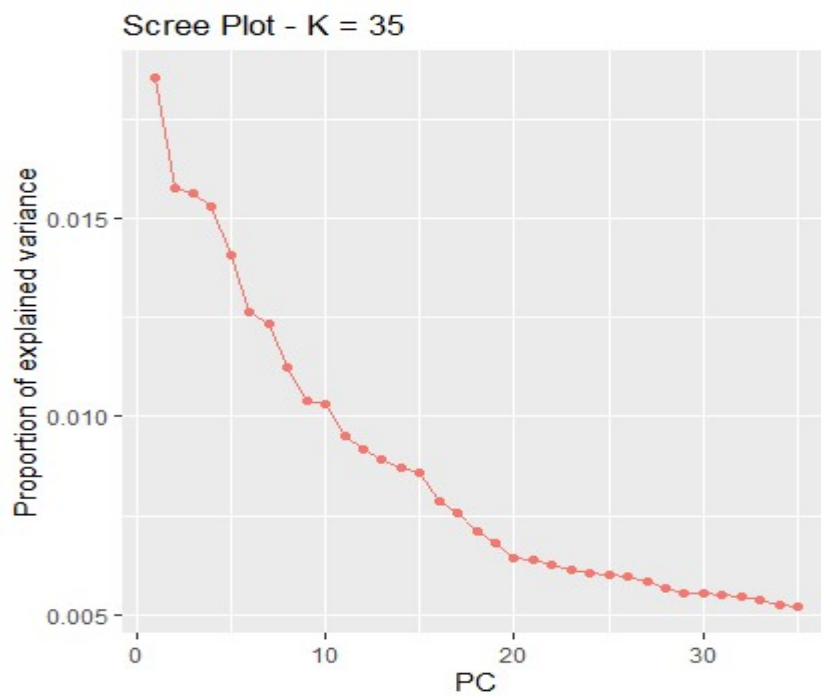

| Chr | Numb. of signatures | Signature range   | Identified by PCAdapt | Identified by LFMM | Gene(s) identified (genes around)<br>In bold gene(s) with the highest probability of being under selection | Agronomic trait/function reported in the literature for domestic mammals                                                                                                         | Literature on genes identified in relation to environmental adaptation in mammals and birds                                                                                                                                            |
|-----|---------------------|-------------------|-----------------------|--------------------|------------------------------------------------------------------------------------------------------------|----------------------------------------------------------------------------------------------------------------------------------------------------------------------------------|----------------------------------------------------------------------------------------------------------------------------------------------------------------------------------------------------------------------------------------|
| 1   | 2                   | 46047752-46411087 |                       |                    | <b>PTGER3</b> (ZRANB2)                                                                                     |                                                                                                                                                                                  |                                                                                                                                                                                                                                        |
|     |                     | 84242981-84773966 |                       |                    | Intergenic zone between ATP11B and <b>SOX2</b>                                                             |                                                                                                                                                                                  | <b>SOX2</b> : implicated in circadian behavioral rhythms in murine (Cheng et al., 2019), cold adaptation in marmots (Bai et al., 2019)                                                                                                 |
| 5   | 1                   | 36576428-37074733 |                       |                    | <b>ADAMTS20</b>                                                                                            | <b>ADAMTS20</b> : Coat coloration (Oget, Servin, & Palhière 2019; Bertolini et al., 2018)                                                                                        | <b>ADAMTS20</b> : associated with high altitude condition in Chinese sheep (Yang et al., 2016)                                                                                                                                         |
| 6   | 7                   | 19677067-20300302 |                       |                    | <b>GSTCD</b> /PPA2/ <b>TET2</b> (ARHGEF38/INTS12/NPNT)                                                     |                                                                                                                                                                                  | <b>GSTCD</b> : adaptation to hypoxia in yaks (Wang et al., 2019), adaptation to climate variables in South African goats (Mdladla, 2016)                                                                                               |
|     |                     | 30139296-30874402 |                       |                    | <b>BMPR1B</b> /PDLIM5/HPGDS/SMA<br>RCAD1 (UNC5C)                                                           | <b>BMPR1B</b> : Ovarian function/fecundity (Shokrollahi & Morammazi, 2018; Mulsant et al., 2001; Souza et al., 2001; Wilson et al., 2001), body size in sheep (Cao et al., 2015) | PDLIM5*: high altitude adaptation in Yaks (Qi et al., 2019)                                                                                                                                                                            |
|     |                     | 36835876-36949805 |                       |                    | <b>HERC6</b> /PPM1K (HERC5/ABCG2)                                                                          | <b>HERC6</b> /ABCG2: milk production (Yurchenko et al., 2019, Do et al., 2017)                                                                                                   | <b>HERC6</b> : adaptation to climate variables in South African goats (Mdladla, 2016), associated with stress grazing tolerance in goats (Mwacharo et al., 2018); associated with arid adaptation in Chinese sheep (Yang et al., 2016) |
|     |                     | 45415286-45625340 |                       |                    | <b>SLC34A2</b> (ANAPC4/SEL1L3)                                                                             | SEL1L3: milk production (Sanchez et al., 2007)                                                                                                                                   | <b>SLC34A2</b> : adaptation to high altitude in cattle (Verma et al., 2018)<br>SEL1L3*: high altitude adaptation in Ethiopian sheep (Edea, Dadi, Dessie, & Kim, 2019)                                                                  |
|     |                     | 69082499-69758377 |                       |                    | <b>SCFD2</b> /LNK1 (FIP1L1/RASL11B)                                                                        | <b>SCFD2</b> : milk constitution (Yodklaew et al., 2017), involved in lipid metabolism (Glastonbury et al., 2016)                                                                |                                                                                                                                                                                                                                        |
|     |                     | 85991683-86155374 |                       |                    | <b>CSN1S1</b> / <b>CSN2</b>                                                                                | <b>CSN1S1</b> / <b>CSN2</b> : structural genes of ruminant milk (see                                                                                                             |                                                                                                                                                                                                                                        |

Supplementary Table 3

|    |   |                     |  |  |                                                                                                  |                                                                                                                                                                                                                                                                                                                                                                                                                                                                                                          |
|----|---|---------------------|--|--|--------------------------------------------------------------------------------------------------|----------------------------------------------------------------------------------------------------------------------------------------------------------------------------------------------------------------------------------------------------------------------------------------------------------------------------------------------------------------------------------------------------------------------------------------------------------------------------------------------------------|
|    |   |                     |  |  | Martin, Szymanowska, Zwierzchowski, & Leroux, 2002)                                              |                                                                                                                                                                                                                                                                                                                                                                                                                                                                                                          |
|    |   | 116501734-117144177 |  |  | <b>CTBP1/FAM193A/TNIP2/NOP14/GRK4/HTT</b> (ADD1/SH3BP2/MFSD10)                                   | <b>CTBP1:</b> lipid storage, fat cell regulation, fat tail deposition (Xu et al., 2017)<br>FAM193A: slope adaptation in Moroccan sheep (Benjelloun, 2015)                                                                                                                                                                                                                                                                                                                                                |
| 7  | 1 | 59624626-60848321   |  |  | <b>SIL1/CTNNA1/UBE2D2/CDC25C/LOC108636363</b> (TMEM173/ECSCR/DNAJC18/MATR3/SLC23A1/PAIP2/LRRTM2) | <b>CTNNA1/SIL1:</b> associated with fecundity (Lai et al., 2016), fat tail deposition in sheep (Ahbara et al., 2019)<br><b>UBE2D2:</b> fat tail deposition in sheep (Mastrangelo et al., 2019)<br><b>CTNNA1:</b> skeletal muscle (Sadkowski et al., 2008)<br><b>SIL1:</b> associated with plateau condition in Chinese sheep (Yang et al., 2016)<br><b>CTNNA1*:</b> high altitude adaptation in Yaks (Qi et al., 2019)<br>TMEM173: associated with desert condition in Chinese sheep (Yang et al., 2016) |
| 8  | 2 | 74894754-75321840   |  |  | <b>UBE2R2/UBAP2/NOL6</b> (AQP7/AQP3/DCAF12)                                                      | <b>UBE2R2/UBAP2:</b> associated with hypoxia tolerance in humans (Udpa et al., 2014); associated with high altitude condition in Chinese sheep (Yang et al., 2016)<br>AQP7: high altitude adaptation in Yaks (Qi et al., 2019)<br>AQP7/AQP3*: implicated in thermal adaptation (Wollenberg Valero et al., 2014)                                                                                                                                                                                          |
|    |   | 31846675-32220312   |  |  | Intergenic zone close to <b>TYRP1</b>                                                            | <b>TYRP1:</b> coat color (Gratten et al., 2007; Becker et al., 2015)<br><b>TYRP1*:</b> associated with desert condition in Chinese sheep (Yang et al., 2016)                                                                                                                                                                                                                                                                                                                                             |
| 10 | 3 | 49806948-50111884   |  |  | <b>TCF12</b>                                                                                     | <b>TCF12:</b> associated with litter size (Tao et al., 2013), lactation (Ozdemir Ozgenturk et al., 2017), muscle lipid composition (Dunner et al., 2013)<br><b>TCF12:</b> adaptation to climate variables in South African goats (Mdladla, 2016)                                                                                                                                                                                                                                                         |
|    |   | 61579137-63362001   |  |  | <b>MDGA2</b> (RPL10L)                                                                            | <b>MDGA2:</b> adaptation to climate variables in South African goats (Mdladla, 2016)                                                                                                                                                                                                                                                                                                                                                                                                                     |
|    |   | 71545588-71700461   |  |  | Intergenic between <b>DPH6</b> and C10H15ORF41                                                   | <b>DPH6:</b> under selection in northern European cattle (Stronen et al., 2019); under selection in Yaks (Lan et al., 2018); associated with plateau condition in Chinese sheep (Yang et al., 2016)                                                                                                                                                                                                                                                                                                      |
| 11 | 3 | 37793580-38186897   |  |  | <b>LOC106502619/PNPT1/CFAP36</b>                                                                 |                                                                                                                                                                                                                                                                                                                                                                                                                                                                                                          |

|    |   |                   |  |                                                                                                        |                                                                                                                                                                                                                                                                                                                                                                                                                                  |                                                                                                                                                                                                                                                                                                                                                                                                                                                                                                                                                                                                                                                                                                                                                                                                        |
|----|---|-------------------|--|--------------------------------------------------------------------------------------------------------|----------------------------------------------------------------------------------------------------------------------------------------------------------------------------------------------------------------------------------------------------------------------------------------------------------------------------------------------------------------------------------------------------------------------------------|--------------------------------------------------------------------------------------------------------------------------------------------------------------------------------------------------------------------------------------------------------------------------------------------------------------------------------------------------------------------------------------------------------------------------------------------------------------------------------------------------------------------------------------------------------------------------------------------------------------------------------------------------------------------------------------------------------------------------------------------------------------------------------------------------------|
|    |   |                   |  | (SEC4R3B/EFEMP1)                                                                                       |                                                                                                                                                                                                                                                                                                                                                                                                                                  |                                                                                                                                                                                                                                                                                                                                                                                                                                                                                                                                                                                                                                                                                                                                                                                                        |
|    |   | 48845878-49036557 |  | <b>USP39/MAT2A</b>                                                                                     |                                                                                                                                                                                                                                                                                                                                                                                                                                  |                                                                                                                                                                                                                                                                                                                                                                                                                                                                                                                                                                                                                                                                                                                                                                                                        |
|    |   | 61247655-61456836 |  | <b>WDPCP</b> (EHBP1/OTX1)                                                                              | <b>WDPCP</b> : regulates adipogenesis (Sazzini et al., 2016)                                                                                                                                                                                                                                                                                                                                                                     | <b>WDPCP</b> : high altitude adaptation in Ethiopian sheep (Edea et al., 2019) and in Tibetan chicken (Wang et al., 2015)<br>EHBP1: associated with desert condition in Chinese sheep (Yang et al., 2016)                                                                                                                                                                                                                                                                                                                                                                                                                                                                                                                                                                                              |
| 12 | 4 | 43598089-44471339 |  | Intergenic zone between <b>KLHL1</b> and <b>PCDH9</b>                                                  | <b>KLHL1</b> : associated with milk yield and lactation persistence (Yue et al., 2017), related to neuron motion and neuromuscular process (Shin et al., 2014)<br><b>KLHL1 and PCDH9</b> : associated with fat tail deposition (Mastrangelo et al., 2019)                                                                                                                                                                        | <b>KLHL1</b> : associated with high altitude adaptation in Chinese sheep (Yang et al., 2016), under selection in human Tibetan (Wang et al., 2011)<br><b>PCDH9</b> : under selection in goat and sheep of arid environment (Kim et al., 2016)                                                                                                                                                                                                                                                                                                                                                                                                                                                                                                                                                          |
|    |   | 48839256-51252236 |  | <b>RNF17/ZMYM2/PARP4/XPO4/PSPC1/CRYL1/IFT88/CENPJ/EEF1AKMT1</b><br>(ZMYM5/GJB2/IL17D/MPHOSP H8/ATP12A) | <b>RNF17</b> : associated with fatty acid composition (Lemos et al., 2016) and growth traits (Edea et al., 2018, Puig-Oliveras et al., 2014)<br><b>PARP4</b> : influences carcass weight (Edea et al., 2018)<br>MPHOSP8/PARP4/CENPJ/RNF17: associated with growth rate (Mészáros et al., 2019)<br>MPHOSP8: up regulated in atretic follicles (Hatzirodos et al., 2014)<br>IFT88: growth and feed intake (Yurchenko et al., 2019) | <b>RNF17</b> : adaptation to climate variables in South African goats (Mdladla, 2016)<br>ATP12A: connected to APT mechanisms and high altitude, adaptation in goats (Wang et al. 2016); under selection in sheep of arid environment (Kim et al., 2016)<br><b>ZMYM2*/PARP4/ZMYM5/PSPC1/CENPJ/GJB2</b> : high altitude adaptation in Ethiopian sheep (Edea et al., 2019)<br>GJB2: under selection in goat of arid environment (Kim et al., 2016), associated with high altitude adaptation in Tibetan sheep (Wei et al., 2016) and environmental adaptation via DNA repair mechanisms (Edea et al., 2014)<br><b>XPO4/CRYL1/CENPJ/RNF17/MPHOSP8/PARP4</b> : associated with stress grazing tolerance in goats (Mwacharo et al., 2018)<br>IFT88/XPO4: under selection in Moroccan goat (Benjelloun, 2015) |
|    |   | 60637258-60950668 |  | <b>NBEA</b> (MAB21L1)                                                                                  | <b>NBEA</b> : wool trait (Wang et al., 2014)                                                                                                                                                                                                                                                                                                                                                                                     | <b>NBEA</b> : high altitude adaptation in Ethiopian sheep (Edea et al., 2019) and in cattle (Zeng, 2017); associated                                                                                                                                                                                                                                                                                                                                                                                                                                                                                                                                                                                                                                                                                   |



|    |   |                   |  |  |                                                                |                                                                                                                                                                                                                                                                                                                                                           |
|----|---|-------------------|--|--|----------------------------------------------------------------|-----------------------------------------------------------------------------------------------------------------------------------------------------------------------------------------------------------------------------------------------------------------------------------------------------------------------------------------------------------|
|    |   |                   |  |  |                                                                | with body temperature regulation in cattle (Howard et al., 2013) under selection in Ugandan and Moroccan goat (Onzima et al., 2018, Benjelloun, 2015); associated with desert adaptation and high altitude adaptation in Chinese sheep (Yang et al., 2016), high altitude adaptation in Yaks (Qi et al., 2019)                                            |
|    |   | 62109741-62503627 |  |  | <b>TRPC4</b> (POSTN/SUPT20H)                                   | <b>TRPC4</b> : associated with resistance to <i>Haemonchus contortus</i> in goat (Corley et al. 2013), implicated in body temperature regulation in cattle (Howard et al., 2013)                                                                                                                                                                          |
| 13 | 1 | 46458560-46473488 |  |  | <b>PRNP</b>                                                    | <b>PRNP*</b> : associated with susceptibility to prion disease in sheep and goat (Greenlee, 2019 for a review)                                                                                                                                                                                                                                            |
| 14 | 1 | 16942897-17652266 |  |  | <b>VPS13B</b>                                                  | <b>VPS13B</b> : milk-related trait (Liu et al., 2018); associated with leg morphology, related with fertility and milk production (Capitan et al., 2014)<br><b>VPS13B</b> : under selection in Moroccan goat (Benjelloun, 2015); associated with arid adaptation in Chinese sheep (Yang et al., 2016), high altitude adaptation in Yaks (Qi et al., 2019) |
| 15 | 2 | 6473101-6606528   |  |  | <b>TRPC6/</b> ANGPTL5 (CEP126)                                 | <b>TRPC6*</b> : high altitude adaptation in Tibetan highlanders (Deng et al., 2019)                                                                                                                                                                                                                                                                       |
|    |   | 30213116-30556088 |  |  | <b>FCHSD2/</b> ARHGEF17 (P2RY6/P2RY2)                          |                                                                                                                                                                                                                                                                                                                                                           |
| 18 | 2 | 36054355-37092141 |  |  | <b>NFATC3/</b> NUFT2/SMPD3/PRMT7 /SLC7A6/PSKH1/CENPT (SLC12A4) |                                                                                                                                                                                                                                                                                                                                                           |
|    |   | 39636636-39980690 |  |  | <b>LOC108637979</b> (ZFHX3/PMFB1)                              |                                                                                                                                                                                                                                                                                                                                                           |
| 19 | 1 | 32969117-33274858 |  |  | <b>PIGL/</b> LOC102188626/ <b>NCOR1/</b> CENPV (ADORA2B)       | <b>PIGL/</b> CENPV: associated with high altitude in Chinese sheep (Yang et al., 2016)<br><b>NCOR1</b> belong to clock circadian gene network in cattle (Wang et al., 2015)<br>ADORA2B*: implicated in thermal adaptation (Wollenberg Valero et al., 2014)                                                                                                |
| 20 | 1 | 13992024-14204949 |  |  | <b>ADAMTS6/</b> CENPK (PPWD1)                                  | <b>ADAMTS6</b> : involved in growth traits in pig (Wu et al. 2019)<br><b>ADAMTS6/</b> CENPK: associated with high altitude adaptation in Chinese sheep (Yang et al., 2016)                                                                                                                                                                                |
| 22 | 2 | 28867395-29079702 |  |  | <b>SHQ1</b> (RYBP/PPP4R2/GXYLT2)                               | <b>SHQ1/</b> PPP4R2: associated with milk production<br><b>SHQ1</b> : associated with plateau and desert condition in Chinese sheep (Yang et al., 2016)                                                                                                                                                                                                   |

|    |   |                   |  |  |                                                                              |                                                                                                                                                                                                              |                                                                                                                                                                                                                                         |
|----|---|-------------------|--|--|------------------------------------------------------------------------------|--------------------------------------------------------------------------------------------------------------------------------------------------------------------------------------------------------------|-----------------------------------------------------------------------------------------------------------------------------------------------------------------------------------------------------------------------------------------|
|    |   |                   |  |  | (Pasandideh et al., 2018; Stella et al., 2010)                               |                                                                                                                                                                                                              |                                                                                                                                                                                                                                         |
|    |   | 33594470-34062919 |  |  | <b>SUCLG2</b>                                                                | <b>SUCLG2</b> : associated with milk production (Di Gerlando et al., 2019), associated with fat deposition in cattle (Silva-Vignato et al., 2019), associated with growth in pig (Yang et al., 2012)         | <b>SUCLG2*</b> : under selection in sheep of arid environment (Kim et al. 2016); associated with desert condition in Chinese sheep (Yang et al., 2016), high altitude adaptation in Yaks (Qi et al., 2019)                              |
| 23 | 2 | 36461204-36962562 |  |  | <b>BTBD9/ZFAND3</b>                                                          |                                                                                                                                                                                                              | <b>BTBD9</b> : adaptation to climate variables in South African goats (Mdladla, 2016)<br><b>ZFAND3</b> : associated with high altitude condition in Chinese sheep (Yang et al., 2016)                                                   |
|    |   | 39855572-40059589 |  |  | <b>UHRF1BP1/C23H6ORF106</b><br>(SNRPC)                                       |                                                                                                                                                                                                              | <b>UHRF1BP1</b> high altitude adaptation in Yaks ( Qi et al., 2019)                                                                                                                                                                     |
| 25 | 1 | 30481819-30744262 |  |  | <b>AUTS2</b>                                                                 |                                                                                                                                                                                                              |                                                                                                                                                                                                                                         |
| 26 | 1 | 28596734-29498263 |  |  | <b>FBXW4/BTRC/GBF1/PSD/C26H10ORF76/DPCD</b><br>(MFSD13A/ACTR1A/NFKB2/PIT X3) | <b>BTRC</b> : associated with milk fatty acid composition (Palombo et al., 2018); associated with milk production (Paten, 2014); genes associated with fatty acid composition of pork (Viterbo et al., 2018) | <b>FBXW4/BTRC</b> : associated with desert in Chinese sheep (Yang et al., 2016)<br><b>BTRC</b> : adaptation to climate variables in goats (Mdladla, 2016), associated with high altitude condition in Chinese sheep (Yang et al., 2016) |

\*belong to the hypoxia regulated proteins database (<http://www.hypoxiadb.com>)

## REFERENCES

- Ahbara, A., Bahbahani, H., Almathen, F., Al Abri, M., Agoub, M. O., Abeba, A., ... Mwacharo, J. M. (2019). Genome-Wide Variation, Candidate Regions and Genes Associated With Fat Deposition and Tail Morphology in Ethiopian Indigenous Sheep. *Frontiers in Genetics*, 9. doi: 10.3389/fgene.2018.00699
- Bai, L., Liu, B., Ji, C., Zhao, S., Liu, S., Wang, R., ... Enqi Liu. (2019). Hypoxic and Cold Adaptation Insights from the Himalayan Marmot Genome. *IScience*,

11, 519–530. doi: 10.1016/j.isci.2018.11.034

Becker, D., Otto, M., Ammann, P., Keller, I., Drögemüller, C., & Leeb, T. (2015). The brown coat colour of Coppernecked goats is associated with a non-synonymous variant at the TYRP1 locus on chromosome 8. *Animal Genetics*, 46(1), 50–54. doi: 10.1111/age.12240

Benjelloun, B. (2015). *Diversité des génomes et adaptation locale des petits ruminants d'un pays méditerranéen : le Maroc* (PhD thesis). Université Grenoble Alpes, France.

Bertolini, F., Servin, B., Talenti, A., Rochat, E., Kim, E. S., Oget, C., ... the AdaptMap consortium. (2018). Signatures of selection and environmental adaptation across the goat genome post-domestication. *Genetics Selection Evolution*, 50(1), 57. doi: 10.1186/s12711-018-0421-y

Cao, J., Wei, C., Liu, D., Wang, H., Wu, M., Xie, Z., ... Du, L. (2015). DNA methylation Landscape of body size variation in sheep. *Scientific Reports*, 5, 13950. doi: 10.1038/srep13950

Capitan, A., Michot, P., Baur, A., Saintilan, R., Hozé, C., Valour, D., Guillaume, F., ... Fritz, S. (2014). Genetic tools to improve reproduction traits in dairy cattle. *Reproduction, Fertility, and Development*, 27(1):14–21.

Cheng, A. H., Bouchard-Cannon, P., Hegazi, S., Lowden, C., Fung, S. W., Chiang, C.-K., ... Cheng, H.-Y. M. (2019). SOX2-Dependent Transcription in Clock Neurons Promotes the Robustness of the Central Circadian Pacemaker. *Cell Reports*, 26(12), 3191-3202.e8. doi: 10.1016/j.celrep.2019.02.068

Deng, L., Zhang, C., Yuan, K., Gao, Y., Pan, Y., Ge, X., ... Xu, S. (2019). Prioritizing natural-selection signals from the deep-sequencing genomic data suggests multi-variant adaptation in Tibetan highlanders. *National Science Review*, 6(6), 1201–1222. doi: 10.1093/nsr/nwz108

Di Gerlando, R., Suter, A.M., Mastrangelo, S., Tolone, M., Portolano, B., Sottile, G., Bagnato, A., Sardina, M.T.(2019). Genome-wide association study between CNVs and milk production traits in Valle del Belice sheep. *PLoS ONE*, 14(4):e0215204. <https://doi.org/10.1371/journal.pone.0215204>

Do, D. N., Bissonnette, N., Lacasse, P., Miglior, F., Sargolzaei, M., Zhao, X., & Ibeagha-Awemu, E. M. (2017). Genome-wide association analysis and pathways enrichment for lactation persistency in Canadian Holstein cattle. *Journal of Dairy Science*, 100(3), 1955–1970. doi: 10.3168/jds.2016-11910

- Dunner, S., Sevane, N., Garcia, D., Levéziel, H., Williams, J. L., Mangin, B., & Valentini, A. (2013). Genes involved in muscle lipid composition in 15 European *Bos taurus* breeds. *Animal Genetics*, *44*(5), 493–501. doi: 10.1111/age.12044
- Edea, Z., Dadi, H., Dessie, T., & Kim, K.-S. (2019). Genomic signatures of high-altitude adaptation in Ethiopian sheep populations. *Genes & Genomics*, *41*(8), 973–981. doi: 10.1007/s13258-019-00820-y
- Edea, Z., Dadi, H., Kim, S.W., Park, J.H., Shin, G.H., Dessie, T., & Kim, K.S. (2014) Linkage disequilibrium and genomic scan to detect selective loci in cattle
- Edea, Z., Jeoung, Y. H., Shin, S.-S., Ku, J., Seo, S., Kim, I.-H., ... Kim, K.-S. (2018). Genome-wide association study of carcass weight in commercial Hanwoo cattle. *Asian-Australasian Journal of Animal Sciences*, *31*(3), 327–334. doi: 10.5713/ajas.17.0276
- Glastonbury, C. A., Viñuela, A., Buil, A., Halldorsson, G. H., Thorleifsson, G., Helgason, H., ... Small, K. S. (2016). Adiposity-Dependent Regulatory Effects on Multi-tissue Transcriptomes. *The American Journal of Human Genetics*, *99*(3), 567–579. doi: 10.1016/j.ajhg.2016.07.001
- Gratten, J., Beraldi, D., Lowder, B. ., McRae, A. ., Visscher, P. ., Pemberton, J. ., & Slate, J. (2007). Compelling evidence that a single nucleotide substitution in TYRP1 is responsible for coat-colour polymorphism in a free-living population of Soay sheep. *Proceedings of the Royal Society B: Biological Sciences*, *274*(1610), 619–626. doi: 10.1098/rspb.2006.3762
- Greenlee, J. J. (2019). Review: Update on Classical and Atypical Scrapie in Sheep and Goats. *Veterinary Pathology*, *56*(1), 6–16. doi: 10.1177/0300985818794247
- Hatzirodos, N., Hummitzsch, K., Irving-Rodgers, H. F., Harland, M. L., Morris, S. E., & Rodgers, R. J. (2014). Transcriptome profiling of granulosa cells from bovine ovarian follicles during atresia. *BMC Genomics*, *15*(1), 40. doi: 10.1186/1471-2164-15-40
- Howard, J. T., Kachman, S. D., Snelling, W. M., Pollak, E. J., Ciobanu, D. C., Kuehn, L. A., & Spangler, M. L. (2013). Beef cattle body temperature during climatic stress: a genome-wide association study. *International Journal of Biometeorology*, *58*, 1665–1672. doi: 10.1007/s00484-013-0773-5

- Kim, E. S., Elbeltagy, A. R., Aboul-Naga, A. M., Rischkowsky, B., Sayre, B., Mwacharo, J. M., & Rothschild, M. F. (2016). Multiple genomic signatures of selection in goats and sheep indigenous to a hot arid environment. *Heredity*, *116*(3), 255–264. doi: 10.1038/hdy.2015.94
- Lai, F.-N., Zhai, H.-L., Cheng, M., Ma, J.-Y., Cheng, S.-F., Ge, W., ... Shen, W. (2016). Whole-genome scanning for the litter size trait associated genes and SNPs under selection in dairy goat (*Capra hircus*). *Scientific Reports*, *6*, 38096. doi: 10.1038/srep38096
- Lan, D., Xiong, X., Mipam, T.-D., Fu, C., Li, Q., Ai, Y., ... Li, J. (2018). Genetic Diversity, Molecular Phylogeny, and Selection Evidence of Jinchuan Yak Revealed by Whole-Genome Resequencing. *G3 (Bethesda, Md.)*, *8*(3), 945–952. doi: 10.1534/g3.118.300572
- Lemos, M. V. A., Chiaia, H. L. J., Berton, M. P., Feitosa, F. L. B., Aboujaoud, C., Camargo, G. M. F., ... Baldi, F. (2016). Genome-wide association between single nucleotide polymorphisms with beef fatty acid profile in Nellore cattle using the single step procedure. *BMC Genomics*, *17*. doi: 10.1186/s12864-016-2511-y
- Liu, J.J., Liang, A.X., Campanile, G., Plastow, G., Zhang, C., Wang, Z., Salzano, A., ... Yang, L.G. (2018). Genome-wide association studies to identify quantitative trait loci affecting milk production traits in water buffalo. *J Dairy Sci.*, *101*(1):433–44.
- Martin, P., Szymanowska, M., Zwierzchowski, L., & Leroux, C. (2002). The impact of genetic polymorphisms on the protein composition of ruminant milks. *Reproduction, Nutrition, Development*, *42*(5), 433–459. doi: 10.1051/rnd:2002036
- Mastrangelo, S., Bahbahani, H., Moioli, B., Ahbara, A., Abri, M. A., Almathen, F., ... Ciani, E. (2019). Novel and known signals of selection for fat deposition in domestic sheep breeds from Africa and Eurasia. *PLOS ONE*, *14*(6), e0209632. doi: 10.1371/journal.pone.0209632
- Mdladla, K. (2016). *Landscape genomic approach to investigate genetic adaptation in South African indigenous goat populations* (PhD thesis). University of KwaZulu-NatalPietermaritzburg. South Africa.
- Meszaros, G., Fornara, M., Reyer, H., Wimmers, K., Solkner, J., Brem, G., ... Zinovieva, N. (2019). Elevated haplotypes frequencies reveal similarities for selection signatures in Western and Russian Simmental populations. *Journal of Central European Agriculture*, *20*(1), 1–11. doi:

- Mulsant, P., Lecerf, F., Fabre, S., Schibler, L., Monget, P., Lanneluc, I., ... Elsen, J. M. (2001). Mutation in bone morphogenetic protein receptor-IB is associated with increased ovulation rate in Booroola Mérino ewes. *Proceedings of the National Academy of Sciences of the United States of America*, 98(9), 5104–5109. doi: 10.1073/pnas.091577598
- Mwacharo, J., Elbeltagy A.R., Kim E.-S., Aboul-Naga A.M., Rischkowsky B. & Rothschild M.F. (2018). Intra-population SNP analysis identifies signatures for grazing stress tolerance in Egyptian local goats. *Proceedings of the World Congress on Genetics Applied to Livestock Production*, 459, 1–6.
- Oget, C., Servin, B., & Palhière, I. (2019). Genetic diversity analysis of French goat populations reveals selective sweeps involved in their differentiation. *Animal Genetics*, 50(1), 54–63. doi: 10.1111/age.12752
- Onzima, R. B., Upadhyay, M. R., Doekes, H. P., Brito, L. F., Bosse, M., Kanis, E., ... Crooijmans, R. P. M. A. (2018). Genome-Wide Characterization of Selection Signatures and Runs of Homozygosity in Ugandan Goat Breeds. *Frontiers in Genetics*, 9. doi: 10.3389/fgene.2018.00318
- Ozdemir Ozgenturk, N., Omeroglu Ulu, Z., Ulu, S., Un, C., Ozdem Oztapak, K., & Altunatmaz, K. (2017). Preparing and Analyzing Expressed Sequence Tags (ESTs) Library for the Mammary Tissue of Local Turkish Kivircik Sheep. *International Journal of Genomics*, 2017. doi: 10.1155/2017/9604762
- Palombo, V., Milanesi, M., Sgorlon, S., Capomaccio, S., Mele, M., Nicolazzi, E., ... D'Andrea, M. (2018). Genome-wide association study of milk fatty acid composition in Italian Simmental and Italian Holstein cows using single nucleotide polymorphism arrays. *Journal of Dairy Science*, 101(12), 11004–11019. doi: 10.3168/jds.2018-14413
- Pasandideh, M., Rahimi-Mianji, G., & Gholizadeh, M. (2018a). A genome scan for quantitative trait loci affecting average daily gain and Kleiber ratio in Baluchi Sheep. *Journal of Genetics*, 97(2), 493–503. doi: 10.1007/s12041-018-0941-9
- Paten, A. M. (2014). *Maternal nutritional programming in the sheep : effects on post-natal growth, mammogenesis and lactation in adult-ewe offspring* (PhD Thesis). Massey University, New Zealand.

- populations adapted to different ecological conditions in Ethiopia. *Journal of Animal Breeding and Genetics*, 131 (5), 358-366.
- Puig-Oliveras, A., Ballester, M., Corominas, J., Revilla, M., Estellé, J., Fernández, A. I., ... Folch, J. M. (2014). A Co-Association Network Analysis of the Genetic Determination of Pig Conformation, Growth and Fatness. *PLOS ONE*, 9(12), e114862. doi: 10.1371/journal.pone.0114862
- Qi, X., Zhang, Q., He, Y., Yang, L., Zhang, X., Shi, P., ... Su, B. (2019). The Transcriptomic Landscape of Yaks Reveals Molecular Pathways for High Altitude Adaptation. *Genome Biology and Evolution*, 11(1), 72–85. doi: 10.1093/gbe/evy264
- Sadkowski, T., Jank, M., Zwierzchowski, L., Siadkowska, E., Oprzadek, J., & Motyl, T. (2008). Gene expression profiling in skeletal muscle of Holstein-Friesian bulls with single-nucleotide polymorphism in the myostatin gene 5'-flanking region. *Journal of Applied Genetics*, 49(3), 237–250. doi: 10.1007/BF03195620
- Sanchez, M.-P., Govignon-Gion, A., Croiseau, P., Fritz, S., Hozé, C., Miranda, G., ... Boichard, D. (2017). Within-breed and multi-breed GWAS on imputed whole-genome sequence variants reveal candidate mutations affecting milk protein composition in dairy cattle. *Genetics Selection Evolution*, 49(1), 68. doi: 10.1186/s12711-017-0344-z
- Sazzini, M., De Fanti, S., Cherubini, A., Quagliariello, A., Profiti, G., Martelli, P. L., ... Luiselli, D. (2016). Ancient pathogen-driven adaptation triggers increased susceptibility to non-celiac wheat sensitivity in present-day European populations. *Genes & Nutrition*, 11. doi: 10.1186/s12263-016-0532-4
- Shin, D.-H., Lee, H.-J., Cho, S., Kim, H. J., Hwang, J. Y., Lee, C.-K., ... Kim, H. (2014). Deleted copy number variation of Hanwoo and Holstein using next generation sequencing at the population level. *BMC Genomics*, 15(1), 240. doi: 10.1186/1471-2164-15-240
- Shokrollahi, B., & Morammazi, S. (2018). Polymorphism of GDF9 and BMP1B genes and their association with litter size in Markhoz goats. *Reproduction in Domestic Animals*, 53(4), 971–978. doi: 10.1111/rda.13196
- Silva-Vignato, B., Coutinho, L. L., Poleti, M. D., Cesar, A. S. M., Moncau, C. T., Regitano, L. C. A., & Balieiro, J. C. C. (2019). Gene co-expression networks associated with carcass traits reveal new pathways for muscle and fat deposition in Nelore cattle. *BMC Genomics*, 20(1), 32. doi: 10.1186/s12864-018-

- Souza, C. J., MacDougall, C., MacDougall, C., Campbell, B. K., McNeilly, A. S., & Baird, D. T. (2001). The Booroola (FecB) phenotype is associated with a mutation in the bone morphogenetic receptor type 1 B (BMPR1B) gene. *The Journal of Endocrinology*, *169*(2), R1-6. doi: 10.1677/joe.0.169r001
- Stella, A., Ajmone-Marsan, P., Lazzari, B., & Boettcher, P. (2010). Identification of Selection Signatures in Cattle Breeds Selected for Dairy Production. *Genetics*, *185*(4), 1451–1461. doi: 10.1534/genetics.110.116111
- Stronen, A. V., Pertoldi, C., Iacolina, L., Kadarmideen, H. N., & Kristensen, T. N. (2019). Genomic analyses suggest adaptive differentiation of northern European native cattle breeds. *Evolutionary Applications*. doi: 10.1111/eva.12783
- Tao, H., Mei, S., Sun, X., Peng, X., Zhang, X., Ma, C., ... Li, F. (2013). Associations of TCF12, CTNNAL1 and WNT10B gene polymorphisms with litter size in pigs. *Animal Reproduction Science*, *140*(3–4), 189–194. doi: 10.1016/j.anireprosci.2013.05.013
- Udpa, N., Ronen, R., Zhou, D., Liang, J., Stobdan, T., Appenzeller, O., ... Haddad, G. G. (2014). Whole genome sequencing of Ethiopian highlanders reveals conserved hypoxia tolerance genes. *Genome Biology*, *15*(2), R36–R36. doi: 10.1186/gb-2014-15-2-r36
- Verma, P., Sharma, A., Sodhi, M., Thakur, K., Kataria, R. S., Niranjana, S. K., ... Mukesh, M. (2018). Transcriptome Analysis of Circulating PBMCs to Understand Mechanism of High Altitude Adaptation in Native Cattle of Ladakh Region. *Scientific Reports*, *8*. doi: 10.1038/s41598-018-25736-7
- Viterbo, V. S., Lopez, B. I. M., Kang, H., Kim, H., Song, C.-W., & Seo, K. S. (2018). Genome wide association study of fatty acid composition in Duroc swine. *Asian-Australasian Journal of Animal Sciences*, *31*(8), 1127–1133. doi: 10.5713/ajas.17.0779
- Wang, B., Zhang, Y. B., Zhang, F., Lin, H., Wang, X., Wan, N., ... Yu, J. (2011). On the origin of Tibetans and their genetic basis in adapting high-altitude environments. *PloS One*, *6*(2), e17002–e17002. doi: 10.1371/journal.pone.0017002
- Wang, H., Chai, Z., Hu, D., Ji, Q., Xin, J., Zhang, C., & Zhong, J. (2019). A global analysis of CNVs in diverse yak populations using whole-genome resequencing. *BMC Genomics*, *20*(1), 61. doi: 10.1186/s12864-019-5451-5



- Wang, M., Zhou, Z., Khan, M. J., Gao, J., & Looor, J. J. (2015). Clock circadian regulator (CLOCK) gene network expression patterns in bovine adipose, liver, and mammary gland at 3 time points during the transition from pregnancy into lactation. *Journal of Dairy Science*, *98*(7), 4601–4612. doi: 10.3168/jds.2015-9430
- Wang, M.-S., Li, Y., Peng, M.-S., Zhong, L., Wang, Z.-J., Li, Q.-Y., ... Zhang, Y.-P. (2015). Genomic Analyses Reveal Potential Independent Adaptation to High Altitude in Tibetan Chickens. *Molecular Biology and Evolution*, *32*(7), 1880–1889. doi: 10.1093/molbev/msv071
- Wang, X., Liu, J., Zhou, G., Guo, J., Yan, H., Niu, Y., ... Chen, Y. (2016). Whole-genome sequencing of eight goat populations for the detection of selection signatures underlying production and adaptive traits. *Scientific Reports*, *6*, 38932. doi: 10.1038/srep38932
- Wang, Z., Zhang, H., Yang, H., Wang, S., Rong, E., Pei, W., ... Wang, N. (2014). Genome-Wide Association Study for Wool Production Traits in a Chinese Merino Sheep Population. *PLoS ONE*, *9*(9). doi: 10.1371/journal.pone.0107101
- Wei, C., Wang, H., Liu, G., Zhao, F., Kijas, J. W., Ma, Y., ... Du, L. (2016). Genome-wide analysis reveals adaptation to high altitudes in Tibetan sheep. *Scientific Reports*, *6*(1), 26770. doi: 10.1038/srep26770
- Wilson, T., Wu, X. Y., Juengel, J. L., Ross, I. K., Lumsden, J. M., Lord, E. A., ... Montgomery, G. W. (2001). Highly prolific Booroola sheep have a mutation in the intracellular kinase domain of bone morphogenetic protein IB receptor (ALK-6) that is expressed in both oocytes and granulosa cells. *Biology of Reproduction*, *64*(4), 1225–1235. doi: 10.1095/biolreprod64.4.1225
- Wollenberg Valero, K. C., Pathak, R., Prajapati, I., Bankston, S., Thompson, A., Usher, J., & Isokpehi, R. D. (2014). A candidate multimodal functional genetic network for thermal adaptation. *PeerJ*, *2*, e578. doi: 10.7717/peerj.578
- Xu, S.-S., Ren, X., Yang, G.-L., Xie, X.-L., Zhao, Y.-X., Zhang, M., ... Li, M.-H. (2017). Genome-wide association analysis identifies the genetic basis of fat deposition in the tails of sheep (*Ovis aries*). *Animal Genetics*, *48*(5), 560–569. doi: 10.1111/age.12572
- Yang, F., Wang, Q., Wang, M., He, K., & Pan, Y. (2012). Associations between gene polymorphisms in two crucial metabolic pathways and growth traits in

- pigs. *Chinese Science Bulletin*, 57(21), 2733–2740. doi: 10.1007/s11434-012-5328-3
- Yang, J., Li, W.-R., Lv, F.-H., He, S.-G., Tian, S.-L., Peng, W.-F., ... Liu, M.-J. (2016). Whole-Genome Sequencing of Native Sheep Provides Insights into Rapid Adaptations to Extreme Environments. *Molecular Biology and Evolution*, 33(10), 2576–2592. doi: 10.1093/molbev/msw129
- Yodklaew, P., Koonawootrittriron, S., Elzo, M. A., Suwanasopee, T., & Laodim, T. (2017). Genome-wide association study for lactation characteristics, milk yield and age at first calving in a Thai multibreed dairy cattle population. *Agriculture and Natural Resources*, 51(3), 223–230. doi: 10.1016/j.anres.2017.04.002
- Yue, S. J., Zhao, Y. Q., Gu, X. R., Yin, B., Jiang, Y. L., Wang, Z. H., & Shi, K. R. (2017). A genome-wide association study suggests new candidate genes for milk production traits in Chinese Holstein cattle. *Animal Genetics*, 48(6), 677–681. doi: 10.1111/age.12593
- Yurchenko, A. A., Deniskova, T. E., Yudin, N. S., Dotsev, A. V., Khamiruev, T. N., Selionova, M. I., ... Larkin, D. M. (2019). High-density genotyping reveals signatures of selection related to acclimation and economically important traits in 15 local sheep breeds from Russia. *BMC Genomics*, 20(3), 294. doi: 10.1186/s12864-019-5537-0
- Zeng, X. (2017). *Angus cattle at high altitude : pulmonary arterial pressure, estimated breeding value and genome-wide association study* (PhD Thesis). Colorado State University.

| Chr | Numb. of signatures | Signature range     | Identified PCAdapt | Identified LFMM | Gene(s) identified<br>In bold gene(s) with the highest probability of being under selection | Agronomic trait/function reported in the literature for domestic mammals                                                                                                                                                                   | Literature on genes identified in relation to environmental adaptation in mammals and birds                                                                                                                                                                                                                                                                                                                                                                                                                                                                                                                                                                                                     |
|-----|---------------------|---------------------|--------------------|-----------------|---------------------------------------------------------------------------------------------|--------------------------------------------------------------------------------------------------------------------------------------------------------------------------------------------------------------------------------------------|-------------------------------------------------------------------------------------------------------------------------------------------------------------------------------------------------------------------------------------------------------------------------------------------------------------------------------------------------------------------------------------------------------------------------------------------------------------------------------------------------------------------------------------------------------------------------------------------------------------------------------------------------------------------------------------------------|
| 1   | 3                   | 117132460-117619369 |                    |                 | <b>CD247/MAEL/POU2F1/LOC105612997/RCS1</b>                                                  | <b>POU2F1</b> : associated with lactase persistence ( Lewinsky et al., 2005); involved in the expression of beta-casein in mammary gland (Zhao et al., 2002), involved in growth and fat deposition in pig ( Pérez-Montarelo et al., 2014) | <b>POU2F1</b> : participate in the cellular response to hypoxia in human (Choi et al., 2005; Yan et al., 1999)<br><b>RCS1</b> : association with endoparasite phenotypes in cattle (Twomey et al., 2019)                                                                                                                                                                                                                                                                                                                                                                                                                                                                                        |
|     |                     | 170496673-170755505 |                    |                 | <b>BBX</b>                                                                                  | <b>BBX</b> : would be associated with supernumerary nipple in sheep (Peng et al., 2017)                                                                                                                                                    |                                                                                                                                                                                                                                                                                                                                                                                                                                                                                                                                                                                                                                                                                                 |
|     |                     | 198199858-198342295 |                    |                 | <b>MASP1/RTP1 (LOC105602729)</b>                                                            |                                                                                                                                                                                                                                            |                                                                                                                                                                                                                                                                                                                                                                                                                                                                                                                                                                                                                                                                                                 |
| 2   | 2                   | 74396276-74749751   |                    |                 | <b>KDM4C</b>                                                                                | <b>KDM4C</b> : affect reproduction (Guan et al., 2016)                                                                                                                                                                                     |                                                                                                                                                                                                                                                                                                                                                                                                                                                                                                                                                                                                                                                                                                 |
|     |                     | 203734535-204610983 |                    |                 | <b>NBEAL1/ICA1L/FAM117B (BMP2)</b>                                                          | <b>NBEA</b> : wool trait (Wang et al. 2014)<br><b>ICA1L/FAM117</b> : associated with the pygmy phenotype (Pemberton et al., 2017)<br><b>BMP2</b> : involved in ovulation rate and litter size in sheep (Jansson, 2014)                     | <b>NBEA</b> : high altitude adaptation in Ethiopian sheep (Edea et al., 2019) and in cattle (Zeng, 2017); associated with body temperature regulation in cattle (Howard et al., 2013) under selection in Ugandan and Moroccan goat (Onzima et al., 2018, Benjelloun, 2015); associated with desert adaptation and high altitude adaptation in Chinese sheep (Yang et al., 2016), high altitude adaptation in Yaks (Qi et al., 2019)<br><br><b>BMP2*</b> : Associated with high Altitude Pulmonary Hypertension in Kyrgyz Highlanders (Iranmehr et al., 2019) and in cattle (Newman et al., 2011), associated with desert adaptation and plateau adaptation in Chinese sheep (Yang et al., 2016) |

Supplementary  
Table 4

|   |   |                                                         |  |  |                                                                                                               |                                                                                                                                                                                                                                        |                                                                                                                                                                                                                                                                                                                                              |
|---|---|---------------------------------------------------------|--|--|---------------------------------------------------------------------------------------------------------------|----------------------------------------------------------------------------------------------------------------------------------------------------------------------------------------------------------------------------------------|----------------------------------------------------------------------------------------------------------------------------------------------------------------------------------------------------------------------------------------------------------------------------------------------------------------------------------------------|
| 3 | 1 | 153576602-154585886                                     |  |  | <b>MSRB3/LOC105609946/WIF1</b>                                                                                | <b>MSRB3:</b> associated with hear phenotype (Wei et al., 2015, Chen et al., 2018, Webster et al., 2015), associated with fat deposition (Mastrangelo et al., 2019)                                                                    | <b>MSRB3:</b> high altitude adaptation in Ethiopian sheep (Edea et al., 2019) and in dogs (Gou et al., 2014); identified as being under selection in Tibetan sheep (Wei et al. 2016), high altitude adaptation in Yaks (Qi et al., 2019)                                                                                                     |
| 4 | 3 | 24727308-25337674                                       |  |  | <b>ISPD/TSPAN13</b>                                                                                           |                                                                                                                                                                                                                                        |                                                                                                                                                                                                                                                                                                                                              |
|   |   | 43272227-43454930                                       |  |  | <b>MAGI2</b>                                                                                                  |                                                                                                                                                                                                                                        | <b>MAGI2*:</b> high altitude adaptation in Ethiopian sheep (Edea et al., 2019); associated with desert and arid adaptation in Chinese sheep (Yang et al., 2016), high altitude adaptation in Yaks (Qi et al., 2019)                                                                                                                          |
|   |   | 47614996-48783775                                       |  |  | COG5/DUS4L/ <b>BCAP29/SLC26A4/CBLL1</b> (PIK3CG/HBP1/PRKAR2B/GPR22/SLC26A3)                                   | SLC26A4: associated with hearing (Tsukamoto et al., 2003, Park et al., 2003)                                                                                                                                                           | <b>BCAP29/ SLC26A4:</b> associated with arid adaptation in sheep (Yang et al., 2016)<br>PRKAR2B: associated with plateau adaptation in Chinese sheep (Yang et al., 2016)                                                                                                                                                                     |
| 5 | 1 | 51252017-51859391                                       |  |  | <b>ARHGAP26/NR3C1</b> (TAX1BP1)                                                                               | <b>ARHGAP26/NR3C1:</b> affect growth and intra-muscular fatty acid in pig (Edea et al., 2017)                                                                                                                                          |                                                                                                                                                                                                                                                                                                                                              |
| 6 | 1 | 36121839-37756801 (PCAdapt)<br>37536930-38567860 (LFMM) |  |  | <b>LCORL/HERC3/HERC5/LOC105615454/NCAPG/DCAF16</b> (FAM184B/HERC6/SPP1/PKD2/LAP3/MED28/PPM1K/ABCG2/MEPE/IBSP) | <b>LCORL/ LAP3/ FAM184B:</b> growth traits (Al-Mamun et al. 2015, Lindholm-Perry et al., 2001; Bongiorno et al., 2012; Eberlein et al., 2009)<br><b>ABCG2/SPP1/LAP3/NCAPG/M EPE:</b> milk production (see Ruiz-Larrañaga et al., 2018) | <b>HERC6/SPP1*:</b> associated with arid adaptation in Chinese sheep (Yang et al., 2016)<br><b>HERC6:</b> adaptation to climate variables in South African goats (Mdladla, 2016), associated with stress grazing tolerance in goats (Mwacharo et al., 2018 );<br><b>LAP3:</b> under selection in goat of arid environment (Kim et al., 2016) |
| 8 | 1 | 62665338-63271621                                       |  |  | <b>ARFGEF3/PERP</b> (TNFAIP3)                                                                                 |                                                                                                                                                                                                                                        | <b>ARFGEF3:</b> associated with arid adaptation in Chinese sheep (Yang et al., 2016)<br><b>TNFAIP3*:</b> associated with parasite resistance in cattle (Tay et al., 2018)                                                                                                                                                                    |

|    |   |                                                         |  |  |                                                         |                                                                                                                                                                                                                                                           |                                                                                                                                                                                                                                                                                 |
|----|---|---------------------------------------------------------|--|--|---------------------------------------------------------|-----------------------------------------------------------------------------------------------------------------------------------------------------------------------------------------------------------------------------------------------------------|---------------------------------------------------------------------------------------------------------------------------------------------------------------------------------------------------------------------------------------------------------------------------------|
| 9  | 1 | 34730111-35192293                                       |  |  | LOC10114620/ <b>ATP6V1H</b> /RGS20 (TCEA1/LYPLA1/SOX17) |                                                                                                                                                                                                                                                           | <b>ATP6V1H</b> : under selection in goat of arid environment (Kim et al., 2016)<br><b>ATP6V1H/SOX17/RGS20/LYPLA1*</b> : associated with humidity condition in goat (Bertolini et al., 2018)                                                                                     |
| 10 | 3 | 29413536-29776019 (PCAdapt)<br>29479711-29940445 (LFMM) |  |  | <b>RXFP2</b> /BLGALTL                                   | <b>RXFP2</b> : involved in horn bud differentiation (Johnston et al., 2011; Allais-Bonnet et al., 2013)                                                                                                                                                   | <b>RXFP2</b> : associated with latitude, precipitation and temperature in free-ranging bighorn sheep (Roffler et al., 2016); identified as being under selection in Tibetan sheep (Wei et al., 2016).                                                                           |
|    |   | 38196759-39403332 (PCAdapt)<br>37941892-39043416 (LFMM) |  |  | Intergenic zone before <b>PCDH9</b>                     | <b>KLHL1</b> : associated with milk yield and lactation persistence (Yue et al., 2017), related to neuron motion and neuromuscular process (Shin et al., 2014)<br><b>KLHL1 and PCDH9</b> : associated with fat tail deposition (Mastrangelo et al., 2019) | <b>KLHL1</b> : associated with high altitude adaptation in sheep (Yang et al., 2016); under selection in Tibetan (Wang et al., 2011)<br><b>PCDH9</b> : under selection in goat and sheep of arid environment (Kim et al., 2016)                                                 |
|    |   | 42194236-43935671                                       |  |  | Intergenic zone between <b>PCDH9</b> and <b>KLHL1</b>   |                                                                                                                                                                                                                                                           |                                                                                                                                                                                                                                                                                 |
| 12 | 1 | 38573067-39683281                                       |  |  | <b>VPS13D</b> /TNFSF18 (TNFSF4/TNFRSF1B/DHRS3)          |                                                                                                                                                                                                                                                           | DHRS3*/TNFRSF1B: associated with arid adaptation in sheep (Yang et al., 2016)                                                                                                                                                                                                   |
| 13 | 3 | 48552093-49208171                                       |  |  | Intergenic close to <b>BMP2</b>                         | <b>BMP2</b> : fat tail deposition (Zhu et al., 2019 ; Yuan et al., 2017 ; Mastrangelo et al., 2019)                                                                                                                                                       | <b>BMP2</b> : associated with arid condition in Chinese sheep (Yang et al., 2016); under selection in sheep of arid environment (Kim et al., 2016); identified as being under selection in Tibetan sheep (Wei et al., 2016); high altitude adaptation in Yaks (Qi et al., 2019) |
|    |   | 55025081-56301025                                       |  |  | <b>CDH26</b> /FAM217B/PPP1R3D (SYCP2/CDH4/EDN3)         | EDN3: associated with coat color (Gautier et al. 2015, Kaelin et al., 2012)                                                                                                                                                                               | EDN3: associated with plateau adaptation in sheep (Yang et al., 2016), slope in Moroccan sheep (Benjelloun 2015); hypoxic adaptation in cetaceans (Tian et al., 2016)                                                                                                           |

|    |   |                   |  |  |                                                                                                |                                                                    |                                                                                                                                                                          |
|----|---|-------------------|--|--|------------------------------------------------------------------------------------------------|--------------------------------------------------------------------|--------------------------------------------------------------------------------------------------------------------------------------------------------------------------|
|    |   |                   |  |  |                                                                                                | CDH26: associated with fecundity (Lai et al., 2016)                |                                                                                                                                                                          |
|    |   | 57302923-57809890 |  |  | <b>RAB22A/PMEPA1</b>                                                                           | <b>RAB22A</b> : implicated in fecundity (Lai et al., 2016)         | <b>RAB22A</b> : implicated in hypoxia (Wang et al., 2014) (PMEPA1 belong to the hypoxia up-regulated proteins database)                                                  |
| 15 | 1 | 59813250-60219075 |  |  | <b>DCDC5</b><br>(DNAJC24/DCDC1)                                                                | <b>DCDC5</b> : associated with body conformation (Wu et al., 2013) | DNAJC24: associated with high altitude adaptation in sheep; Heat Shock protein (Yang et al., 2016); under selection in Uganda goat (Onzima et al., 2018)                 |
| 17 | 1 | 55110665-55329873 |  |  | <b>CIT/TMEM233</b> (PRKAB1)                                                                    |                                                                    | PRKAB1: under selection in goat of arid environment (Kim et al., 2015)                                                                                                   |
| 18 | 1 | 66257896-68025345 |  |  | <b>TRAF3/CDC42BPB/PPP1R13B</b><br>(CKB/KLC1/TDRD9/AKT1/TMEM179/SIVA1/ADSSL1/INF2/C18H14orf180) |                                                                    | TMEM179B: associated with arid condition in sheep (Yang et al., 2016); implicated in hypoxia (Gao et al., 2017)                                                          |
| 19 | 1 | 28133753-28962852 |  |  | <b>PDZRN3/GXYLT2</b><br>(PPP4R2/SHQ1)                                                          | PPP4R2/SHQ1: associated with growth rate (Pasandideh et al., 2018) | SHQ1 associated with plateau and desert condition in sheep (Yang et al., 2016)                                                                                           |
| 21 | 1 | 17885334-18117515 |  |  | <b>PAK1</b><br>(LOC101117288/AQP11)                                                            |                                                                    | PAK1 associated with plateau condition in sheep (Yang et al., 2016); under selection in sheep of arid environment (Kim et al., 2016)                                     |
| 25 | 1 | 19073058-19380300 |  |  | <b>JMJD1C/NRBF2</b> (REEP3)                                                                    |                                                                    | REEP3 associated with plateau condition in sheep (Yang et al., 2016)<br><b>JMJD1C*/NRBF2/REEP3</b> : associated with high-altitude adaptation in pig (Dong et al., 2014) |

\*belong to the hypoxia regulated proteins database (<http://www.hypoxiadb.com>)

## REFERENCES

- Allais-Bonnet, A., Grohs, C., Medugorac, I., Krebs, S., Djari, A., Graf, A., ... Capitan, A. (2013). Novel insights into the bovine polled phenotype and horn ontogenesis in Bovidae. *PLoS One*, 8(5), e63512. doi: 10.1371/journal.pone.0063512
- Al-Mamun, H. A., Kwan, P., Clark, S. A., Ferdosi, M. H., Tellam, R., & Gondro, C. (2015). Genome-wide association study of body weight in Australian Merino sheep reveals an orthologous region on OAR6 to human and bovine genomic regions affecting height and weight. *Genetics, Selection, Evolution: GSE*, 47, 66. doi: 10.1186/s12711-015-0142-4
- Benjelloun, B. (2015). *Diversité des génomes et adaptation locale des petits ruminants d'un pays méditerranéen : le Maroc* (PhD thesis). Université Grenoble Alpes, France.
- Bertolini, F., Servin, B., Talenti, A., Rochat, E., Kim, E. S., Oget, C., ... the AdaptMap consortium. (2018). Signatures of selection and environmental adaptation across the goat genome post-domestication. *Genetics Selection Evolution*, 50(1), 57. doi: 10.1186/s12711-018-0421-y
- Bongiorni, S., Mancini, G., Chillemi, G., Pariset, L., & Valentini, A. (2012). Identification of a Short Region on Chromosome 6 Affecting Direct Calving Ease in Piedmontese Cattle Breed. *PLOS ONE*, 7(12), e50137. doi: 10.1371/journal.pone.0050137
- Chen, C., Liu, C., Xiong, X., Fang, S., Yang, H., Zhang, Z., ... Huang, L. (2018). Copy number variation in the MSRB3 gene enlarges porcine ear size through a mechanism involving miR-584-5p. *Genetics, Selection, Evolution : GSE*, 50. doi: 10.1186/s12711-018-0442-6
- Choi, K.-O., Lee, T., Lee, N., Kim, J.-H., Yang, E. G., Yoon, J. M., ... Park, H. (2005). Inhibition of the catalytic activity of hypoxia-inducible

factor-1alpha-prolyl-hydroxylase 2 by a MYND-type zinc finger. *Molecular Pharmacology*, 68(6), 1803–1809. doi:  
10.1124/mol.105.015271

Dong, K., Yao, N., Pu, Y., He, X., Zhao, Q., Luan, Y., ... Ma, Y. (2014). Genomic Scan Reveals Loci under Altitude Adaptation in Tibetan and Dahe Pigs. *PLOS ONE*, 9(10), e110520. doi: 10.1371/journal.pone.0110520

Eberlein, A., Takasuga, A., Setoguchi, K., Pfuhl, R., Flisikowski, K., Fries, R., ... Kühn, C. (2009). Dissection of genetic factors modulating fetal growth in cattle indicates a substantial role of the non-SMC condensin I complex, subunit G (NCAPG) gene. *Genetics*, 183(3), 951–964. doi: 10.1534/genetics.109.106476

Edea, Z., Dadi, H., Dessie, T., & Kim, K.-S. (2019). Genomic signatures of high-altitude adaptation in Ethiopian sheep populations. *Genes & Genomics*, 41(8), 973–981. doi: 10.1007/s13258-019-00820-y

Edea, Z., Hong, J.-K., Jung, J.-H., Kim, D.-W., Kim, Y.-M., Kim, E.-S., ... Kim, K.-S. (2017). Detecting selection signatures between Duroc and Duroc synthetic pig populations using high-density SNP chip. *Animal Genetics*, 48(4), 473–477. doi: 10.1111/age.12559

Gao, L., Bonilla-Henao, V., García-Flores, P., Arias-Mayenco, I., Ortega-Sáenz, P., & López-Barneo, J. (2017). Gene expression analyses reveal metabolic specifications in acute O<sub>2</sub>-sensing chemoreceptor cells. *The Journal of Physiology*, 595(18), 6091–6120. doi:  
10.1113/JP274684

Gautier, M. (2015). Genome-Wide Scan for Adaptive Divergence and Association with Population-Specific Covariates. *BioRxiv*, 023721. doi:  
10.1101/023721



- Gou, X., Wang, Z., Li, N., Qiu, F., Xu, Z., Yan, D., ... Li, Y. (2014). Whole-genome sequencing of six dog breeds from continuous altitudes reveals adaptation to high-altitude hypoxia. *Genome Research*, 24(8), 1308–1315. doi: 10.1101/gr.171876.113
- Guan, D., Luo, N., Tan, X., Zhao, Z., Huang, Y., Na, R., ... Zhao, Y. (2016). Scanning of selection signature provides a glimpse into important economic traits in goats (*Capra hircus*). *Sci. Rep.*, 6(1). Retrieved from <https://cyberleninka.org/article/n/687069>
- Howard, J. T., Kachman, S. D., Snelling, W. M., Pollak, E. J., Ciobanu, D. C., Kuehn, L. A., & Spangler, M. L. (2013). Beef cattle body temperature during climatic stress: a genome-wide association study. *International Journal of Biometeorology*, 58, 1665–1672. doi: 10.1007/s00484-013-0773-5
- Iranmehr, A., Stobdan, T., Zhou, D., Poulsen, O., Strohl, K. P., Aldashev, A., ... Haddad, G. G. (2019). Novel insight into the genetic basis of high-altitude pulmonary hypertension in Kyrgyz highlanders. *European Journal of Human Genetics: EJHG*, 27(1), 150–159. doi: 10.1038/s41431-018-0270-8
- Jansson, T. (2014). *Genes involved in ovulation rate and litter size in sheep*. Dept. of Animal Breeding and Genetics, Uppsala: SLU.
- Johnston, S. E., McEwan, J. C., Pickering, N. K., Kijas, J. W., Beraldi, D., Pilkington, J. G., ... Slate, J. (2011). Genome-wide association mapping identifies the genetic basis of discrete and quantitative variation in sexual weaponry in a wild sheep population. *Molecular Ecology*, 20(12), 2555–2566. doi: 10.1111/j.1365-294X.2011.05076.x
- Kaelin, C. B., Xu, X., Hong, L. Z., David, V. A., McGowan, K. A., Schmidt-Küntzel, A., ... Menotti-Raymond, M. (2012). Specifying and Sustaining Pigmentation Patterns in Domestic and Wild Cats. *Science (New York, N.Y.)*, 337(6101), 1536–1541. doi:

10.1126/science.1220893

- Kim, E. S., Elbeltagy, A. R., Aboul-Naga, A. M., Rischkowsky, B., Sayre, B., Mwacharo, J. M., & Rothschild, M. F. (2016). Multiple genomic signatures of selection in goats and sheep indigenous to a hot arid environment. *Heredity*, *116*(3), 255–264. doi: 10.1038/hdy.2015.94
- Lai, F.-N., Zhai, H.-L., Cheng, M., Ma, J.-Y., Cheng, S.-F., Ge, W., ... Shen, W. (2016). Whole-genome scanning for the litter size trait associated genes and SNPs under selection in dairy goat (*Capra hircus*). *Scientific Reports*, *6*. doi: 10.1038/srep38096
- Lewinsky, R. H., Jensen, T. G. K., Møller, J., Stensballe, A., Olsen, J., & Troelsen, J. T. (2005). T-13910 DNA variant associated with lactase persistence interacts with Oct-1 and stimulates lactase promoter activity in vitro. *Human Molecular Genetics*, *14*(24), 3945–3953. doi: 10.1093/hmg/ddi418
- Lindholm-Perry, A. K., Sexten, A. K., Kuehn, L. A., Smith, T. P. L., King, D. A., Shackelford, S. D., ... Freetly, H. C. (2011). Association, effects and validation of polymorphisms within the NCAPG - LCORL locus located on BTA6 with feed intake, gain, meat and carcass traits in beef cattle. *BMC Genetics*, *12*, 103. doi: 10.1186/1471-2156-12-103
- Newman, J. H., Holt, T. N., Hedges, L. K., Womack, B., Memon, S. S., Willers, E. D., ... Hamid, R. (2011). High-Altitude Pulmonary Hypertension in Cattle (Brisket Disease): Candidate Genes and Gene Expression Profiling of Peripheral Blood Mononuclear Cells. *Pulmonary Circulation*, *1*(4), 462–469. doi: 10.4103/2045-8932.93545
- Mastrangelo, S., Bahbahani, H., Moioli, B., Ahbara, A., Abri, M. A., Almathen, F., ... Ciani, E. (2019). Novel and known signals of selection for fat deposition in domestic sheep breeds from Africa and Eurasia. *PLOS ONE*, *14*(6), e0209632. doi: 10.1371/journal.pone.0209632

- Mdladla, K. (2016). *Landscape genomic approach to investigate genetic adaptation in South African indigenous goat populations* (PhD thesis). University of KwaZulu-NatalPietermaritzburg. South Africa.
- Mwacharo, J., Elbeltagy A.R., Kim E.-S., Aboul-Naga A.M., Rischkowsky B. & Rothschild M.F. (2018). Intra-population SNP analysis identifies signatures for grazing stress tolerance in Egyptian local goats. *Proceedings of the World Congress on Genetics Applied to Livestock Production*, 459, 1–6.
- Onzima, R. B., Upadhyay, M. R., Doekes, H. P., Brito, L. F., Bosse, M., Kanis, E., ... Crooijmans, R. P. M. A. (2018). Genome-Wide Characterization of Selection Signatures and Runs of Homozygosity in Ugandan Goat Breeds. *Frontiers in Genetics*, 9. doi: 10.3389/fgene.2018.00318
- Park, H.-J., Shaukat, S., Liu, X.-Z., Hahn, S. H., Naz, S., Ghosh, M., ... Griffith, A. J. (2003). Origins and frequencies of SLC26A4 (PDS) mutations in east and south Asians: global implications for the epidemiology of deafness. *Journal of Medical Genetics*, 40(4), 242–248. doi: 10.1136/jmg.40.4.242
- Pasandideh, M., Rahimi-Mianji, G., & Gholizadeh, M. (2018a). A genome scan for quantitative trait loci affecting average daily gain and Kleiber ratio in Baluchi Sheep. *Journal of Genetics*, 97(2), 493–503. doi: 10.1007/s12041-018-0941-9
- Pemberton, T. J., Verdu, P., Becker, N. S., Willer, C. J., Hewlett, B. S., Le Bomin, S., ... Heyer, E. (2017). *A Genome Scan for Genes Underlying Adult Body Size Differences between Central African Pygmies and their Non-Pygmy Neighbors* [Preprint]. doi: 10.1101/187369

- Peng, W.-F., Xu, S.-S., Ren, X., Lv, F.-H., Xie, X.-L., Zhao, Y.-X., ... Li, M.-H. (2017). A genome-wide association study reveals candidate genes for the supernumerary nipple phenotype in sheep (*Ovis aries*). *Animal Genetics*, *48*(5), 570–579. doi: 10.1111/age.12575
- Pérez-Montarelo, D., Madsen, O., Alves, E., Rodríguez, M. C., Folch, J. M., Noguera, J. L., ... Fernández, A. I. (2014). Identification of genes regulating growth and fatness traits in pig through hypothalamic transcriptome analysis. *Physiological Genomics*, *46*(6), 195–206. doi: 10.1152/physiolgenomics.00151.2013
- Qi, X., Zhang, Q., He, Y., Yang, L., Zhang, X., Shi, P., ... Su, B. (2019). The Transcriptomic Landscape of Yaks Reveals Molecular Pathways for High Altitude Adaptation. *Genome Biology and Evolution*, *11*(1), 72–85. doi: 10.1093/gbe/evy264
- Roffler, G. H., Amish, S. J., Smith, S., Cosart, T., Kardos, M., Schwartz, M. K., & Luikart, G. (2016). SNP discovery in candidate adaptive genes using exon capture in a free-ranging alpine ungulate. *Molecular Ecology Resources*, *16*(5), 1147–1164. doi: 10.1111/1755-0998.12560
- Ruiz-Larrañaga, O., Langa, J., Rendo, F., Manzano, C., Iriondo, M., & Estonba, A. (2018). Genomic selection signatures in sheep from the Western Pyrenees. *Genetics, Selection, Evolution : GSE*, *50*. doi: 10.1186/s12711-018-0378-x
- Shin, D.-H., Lee, H.-J., Cho, S., Kim, H. J., Hwang, J. Y., Lee, C.-K., ... Kim, H. (2014). Deleted copy number variation of Hanwoo and Holstein using next generation sequencing at the population level. *BMC Genomics*, *15*, 240. doi: 10.1186/1471-2164-15-240
- Taye, M., Lee, W., Caetano-Anolles, K., Dessie, T., Cho, S., Oh, S. J., ... Kim, H. (2018). Exploring the genomes of East African Indicine cattle breeds reveals signature of selection for tropical environmental adaptation traits. *Cogent Food & Agriculture*, *4*(1), 1552552. doi: 10.1080/23311932.2018.1552552

- Tian, R., Wang, Z., Niu, X., Zhou, K., Xu, S., & Yang, G. (2016). Evolutionary Genetics of Hypoxia Tolerance in Cetaceans during Diving. *Genome Biology and Evolution*, 8(3), 827–839. doi: 10.1093/gbe/evw037
- Tsukamoto, K., Suzuki, H., Harada, D., Namba, A., Abe, S., & Usami, S. (2003). Distribution and frequencies of PDS (SLC26A4) mutations in Pendred syndrome and nonsyndromic hearing loss associated with enlarged vestibular aqueduct: a unique spectrum of mutations in Japanese. *European Journal of Human Genetics: EJHG*, 11(12), 916–922. doi: 10.1038/sj.ejhg.5201073
- Twomey, A. J., Berry, D. P., Evans, R. D., Doherty, M. L., Graham, D. A., & Purfield, D. C. (2019). Genome-wide association study of endo-parasite phenotypes using imputed whole-genome sequence data in dairy and beef cattle. *Genetics, Selection, Evolution : GSE*, 51. doi: 10.1186/s12711-019-0457-7
- Wang, T., Gilkes, D. M., Takano, N., Xiang, L., Luo, W., Bishop, C. J., ... Semenza, G. L. (2014). Hypoxia-inducible factors and RAB22A mediate formation of microvesicles that stimulate breast cancer invasion and metastasis. *Proceedings of the National Academy of Sciences of the United States of America*, 111(31), E3234-3242. doi: 10.1073/pnas.1410041111
- Webster, M. T., Kamgari, N., Perloski, M., Hoepfner, M. P., Axelsson, E., Hedhammar, Å., ... Lindblad-Toh, K. (2015). Linked genetic variants on chromosome 10 control ear morphology and body mass among dog breeds. *BMC Genomics*, 16, 474. doi: 10.1186/s12864-015-1702-2
- Wei, C., Wang, H., Liu, G., Wu, M., Cao, J., Liu, Z., ... Du, L. (2015). Genome-wide analysis reveals population structure and selection in Chinese indigenous sheep breeds. *BMC Genomics*, 16(1). doi: 10.1186/s12864-015-1384-9
- Wu, X., Fang, M., Liu, L., Wang, S., Liu, J., Ding, X., ... Sun, D. (2013). Genome wide association studies for body conformation traits in the

- Chinese Holstein cattle population. *BMC Genomics*, 14(1), 897. doi: 10.1186/1471-2164-14-897
- Yang, J., Li, W.-R., Lv, F.-H., He, S.-G., Tian, S.-L., Peng, W.-F., ... Liu, M.-J. (2016). Whole-Genome Sequencing of Native Sheep Provides Insights into Rapid Adaptations to Extreme Environments. *Molecular Biology and Evolution*, 33(10), 2576–2592. doi: 10.1093/molbev/msw129
- Yan, S. F., Lu, J., Zou, Y. S., Soh-Won, J., Cohen, D. M., Buttrick, P. M., ... Stern, D. M. (1999). Hypoxia-associated induction of early growth response-1 gene expression. *The Journal of Biological Chemistry*, 274(21), 15030–15040. doi: 10.1074/jbc.274.21.15030
- Yuan, Z., Liu, E., Liu, Z., Kijas, J. W., Zhu, C., Hu, S., ... Wei, C. (2017). Selection signature analysis reveals genes associated with tail type in Chinese indigenous sheep. *Animal Genetics*, 48(1), 55–66. doi: 10.1111/age.12477
- Yue, S. J., Zhao, Y. Q., Gu, X. R., Yin, B., Jiang, Y. L., Wang, Z. H., & Shi, K. R. (2017). A genome-wide association study suggests new candidate genes for milk production traits in Chinese Holstein cattle. *Animal Genetics*, 48(6), 677–681. doi: 10.1111/age.12593
- Zeng, X. (2017). *Angus cattle at high altitude : pulmonary arterial pressure, estimated breeding value and genome-wide association study* (PhD Thesis). Colorado State University.
- Zhao, F.-Q., Adachi, K., & Oka, T. (2002). Involvement of Oct-1 in transcriptional regulation of beta-casein gene expression in mouse mammary gland. *Biochimica Et Biophysica Acta*, 1577(1), 27–37. doi: 10.1016/s0167-4781(02)00402-5
- Zhu, C., Huang, X., Li, M., Qin, S., Fang, S., & Ma, Y. (2019). *GWAS and post-GWAS to Identification of Genes Associated with Sheep Tail Fat Deposition*. Retrieved from <https://www.preprints.org/manuscript/201906.0093/v1>

| Chr.  | GOAT<br>PCAdapt Signatures | GOAT<br>LFMM Signatures                                                                                                                                                                                                                                                                                                                                                                                                                                                                                                                                                                                                                                             | SHEEP<br>LFMM Signatures                                                                                                                                                                                                                                                                                                                                                                                                                                                                                                                                                                                                     | SHEEP<br>PCAdapt Signatures |
|-------|----------------------------|---------------------------------------------------------------------------------------------------------------------------------------------------------------------------------------------------------------------------------------------------------------------------------------------------------------------------------------------------------------------------------------------------------------------------------------------------------------------------------------------------------------------------------------------------------------------------------------------------------------------------------------------------------------------|------------------------------------------------------------------------------------------------------------------------------------------------------------------------------------------------------------------------------------------------------------------------------------------------------------------------------------------------------------------------------------------------------------------------------------------------------------------------------------------------------------------------------------------------------------------------------------------------------------------------------|-----------------------------|
| Chr 1 |                            | <p><b><u>46047752-46411087</u></b></p> <p>snp45739-scaffold627-5315341 46047752*<br/> snp45746-scaffold627-5616708 46348421<br/> snp45747-scaffold627-5650100 46381611<br/> snp12636-scaffold1480-1163799 46411087</p> <p><b><u>84242981-84773966</u></b></p> <p>snp32731-scaffold377-2079945 84242981<br/> snp32730-scaffold377-2049881 84272916<br/> snp32729-scaffold377-2002407 84320917<br/> snp32728-scaffold377-1966001 84357680*<br/> snp32723-scaffold377-1745669 84573836<br/> snp32721-scaffold377-1639477 84680820<br/> snp32720-scaffold377-1606429 84713972<br/> snp32719-scaffold377-1576455 84743986<br/> snp32718-scaffold377-1546443 84773966</p> | <p><b><u>117132460-117619369</u></b></p> <p>s74762.1 117132460<br/> OAR1_127060133.1 117619369<br/> s71952.1 117697523<br/> s49384.1 117771574<br/> OAR1_127291951.1 117853500*<br/> s73007.1 117916288*</p> <p><b><u>170496673-170755505</u></b></p> <p>OAR1_183962708.1 170496673<br/> OAR1_184162321.1 170690492<br/> s12579.1 170725424<br/> OAR1_184227318.1 170755505*</p> <p><b><u>198199858-198342295</u></b></p> <p>OAR1_214098599.1 198199858<br/> OAR1_214136810.1 198227861<br/> OAR1_214203546.1 198286740<br/> OAR1_214229899.1 198312258<br/> OAR1_214247090.1 198329788<br/> OAR1_214257185.1 198342295*</p> |                             |
| Chr2  |                            |                                                                                                                                                                                                                                                                                                                                                                                                                                                                                                                                                                                                                                                                     | <p><b><u>74396276-74749751</u></b></p> <p>OAR2_79262293_X.1 74396276<br/> OAR2_79499240.1 74613800<br/> OAR2_79550682.1 74669837*<br/> OAR2_79594745.1 74714666*</p>                                                                                                                                                                                                                                                                                                                                                                                                                                                         |                             |

Supplementary Table 5

|       |  |  |                                                                                                                                                                                                                                                                                                 |                                                                                                                                                                                                                                      |
|-------|--|--|-------------------------------------------------------------------------------------------------------------------------------------------------------------------------------------------------------------------------------------------------------------------------------------------------|--------------------------------------------------------------------------------------------------------------------------------------------------------------------------------------------------------------------------------------|
|       |  |  | <p>s62643.1 74749751*</p> <p><u>203734535-204610983</u></p> <p>s34105.1 203717963<br/> OAR2_215477291.1 203734535<br/> OAR2_215596955.1 203761367<br/> OAR2_215636399.1 203797311*<br/> OAR2_215711808.1 203869407<br/> OAR2_216615372.1 204610983</p>                                          |                                                                                                                                                                                                                                      |
| Chr 3 |  |  | <p><u>153576602-154585886</u></p> <p>OAR3_164422954.1 153576602<br/> s26177.1 153826281*<br/> s69653.1 153976304*<br/> s69686.1 153996225<br/> OAR3_165009241.1 154033734<br/> OAR3_165050963.1 154072493<br/> OAR3_165200988.1* 154223123<br/> s75917.1 154318689*<br/> s61003.1 154585886</p> | <p><u>153889169-154318689</u></p> <p>OAR3_164788310.1 153889169<br/> s16949.1 153927239<br/> s69653.1 153976304<br/> s69686.1 153996225<br/> OAR3_165009241.1 154033734<br/> OAR3_165050963.1 154072493*<br/> s75917.1 154318689</p> |
| Chr 4 |  |  | <p><u>24727308-25337674</u></p> <p>OAR4_26039959.1 24727308*<br/> OAR4_26021918.1 24745112*<br/> OAR4_26202538_X.1 24891467*<br/> OAR4_26645098.1 25337674</p> <p><u>43272227-43454930</u></p> <p>OAR4_45683707.1 43272227<br/> OAR4_45746457.1 43333090*</p>                                   |                                                                                                                                                                                                                                      |



|       |                                                                                                                       |                                                                                                                                                                                                                                                                                                       |                                                                                                                                                                                                                                                                                                                                                                                                                                                                                                                                                    |                                                                                                      |
|-------|-----------------------------------------------------------------------------------------------------------------------|-------------------------------------------------------------------------------------------------------------------------------------------------------------------------------------------------------------------------------------------------------------------------------------------------------|----------------------------------------------------------------------------------------------------------------------------------------------------------------------------------------------------------------------------------------------------------------------------------------------------------------------------------------------------------------------------------------------------------------------------------------------------------------------------------------------------------------------------------------------------|------------------------------------------------------------------------------------------------------|
|       |                                                                                                                       |                                                                                                                                                                                                                                                                                                       | <p>s36928.1 43433914<br/> <b>OAR4_45871691.1 43454930*</b></p> <p><u>47614996-48783775</u></p> <p><b>OAR4_50346558.1 47614996</b><br/> s34975.1 47852019<br/> OAR4_50737323.1 47928357<br/> <b>s24500.1 47960510</b><br/> <b>s39886.1 48085823</b><br/> <b>s32219.1 48284042</b><br/> <b>OAR4_51241289.1 48402666</b><br/> <b>OAR4_51315739.1 48480244</b><br/> <b>OAR4_51346813.1 48510936</b><br/> <b>OAR4_51441757.1 48607563</b><br/> <b>OAR4_51489408.1 48649775*</b><br/> <b>s46022.1 48737779*</b><br/> <b>OAR4_51625352.1 48783775</b></p> |                                                                                                      |
| Chr 5 |                                                                                                                       | <p><u>36576428-37074733</u></p> <p>snp9058-scaffold1329-759519 36576428<br/> snp9059-scaffold1329-790608 36606034<br/> snp9062-scaffold1329-936768 36750654<br/> snp9063-scaffold1329-976103 36790914*<br/> snp9066-scaffold1329-1128684 36939084<br/> <b>snp12728-scaffold149-35530 37074733</b></p> | <p><u>51252017-51859391</u></p> <p>s44340.1 51252017*<br/> <b>OAR5_55651844.1 51284980</b><br/> <b>OAR5_55827200.1 51367486</b><br/> <b>OAR5_55949772.1 51459909*</b><br/> OAR5_56305688.1 51818687<br/> <b>OAR5_56351796.1 51859391*</b></p>                                                                                                                                                                                                                                                                                                      |                                                                                                      |
| Chr 6 | <p><u>36835876-36949805</u></p> <p>snp26737-scaffold281-187160 36835876<br/> snp26738-scaffold281-221127 36870090</p> | <p><u>19677067-20300302</u></p> <p>snp49755-scaffold710-1594826 19677067<br/> <b>snp49753-scaffold710-1514064 19757830</b></p>                                                                                                                                                                        | <p><u>37536930-38567860</u></p> <p><b>OAR6_41850329.1 37536930</b><br/> OAR6_42094768.1 37756801</p>                                                                                                                                                                                                                                                                                                                                                                                                                                               | <p><u>36121839-37756801</u></p> <p>OAR6_40409402.1 36121839<br/> <b>OAR6_40496376.1 36210335</b></p> |

|                                                                                                                                                                                                                                                                                                                                                                                                                                                                                                                                                                                                                                                                                                                                                                                                                                                                                                                                                      |                                                                                                                                                                                                                                                                                                                                                                                                                                                                                                                                                                                                                                                                                                                                                                                                                                                                                                                                                                                                                                                                                                                                                                                                                |                                                                                                                                                                                         |                                                                                                                                                                                                                                                                                                                                              |
|------------------------------------------------------------------------------------------------------------------------------------------------------------------------------------------------------------------------------------------------------------------------------------------------------------------------------------------------------------------------------------------------------------------------------------------------------------------------------------------------------------------------------------------------------------------------------------------------------------------------------------------------------------------------------------------------------------------------------------------------------------------------------------------------------------------------------------------------------------------------------------------------------------------------------------------------------|----------------------------------------------------------------------------------------------------------------------------------------------------------------------------------------------------------------------------------------------------------------------------------------------------------------------------------------------------------------------------------------------------------------------------------------------------------------------------------------------------------------------------------------------------------------------------------------------------------------------------------------------------------------------------------------------------------------------------------------------------------------------------------------------------------------------------------------------------------------------------------------------------------------------------------------------------------------------------------------------------------------------------------------------------------------------------------------------------------------------------------------------------------------------------------------------------------------|-----------------------------------------------------------------------------------------------------------------------------------------------------------------------------------------|----------------------------------------------------------------------------------------------------------------------------------------------------------------------------------------------------------------------------------------------------------------------------------------------------------------------------------------------|
| <p>snp26739-scaffold281-267352 36916955*<br/> snp26740-scaffold281-299943 36949805</p> <p><u>85991683-86155374</u></p> <p>snp59426-scaffold980-307288 85991683<br/> snp60000-CSN1S1-ex17 85993405<br/> snp59427-scaffold980-309132 85994156<br/> snp59428-scaffold980-310410 85995436<br/> snp59429-scaffold980-310523 85995549<br/> snp59430-scaffold980-311053 85996079<br/> snp59432-scaffold980-311547 85996571<br/> snp59434-scaffold980-322977 86007956*<br/> snp59438-scaffold980-323773 86008752*<br/> snp59439-scaffold980-324311 86009290*<br/> snp59440-scaffold980-324828 86009807*<br/> snp59441-scaffold980-325353 86010332*<br/> snp59450-scaffold980-400667 86085897<br/> snp59451-scaffold980-402598 86087828<br/> snp59452-scaffold980-402711 86087941<br/> snp59454-scaffold980-403305 86088536<br/> snp59455-scaffold980-407817 86093124<br/> snp59458-scaffold980-434555 86118732<br/> snp59459-scaffold980-469488 86155374</p> | <p>snp49748-scaffold710-1271522 20001811<br/> snp49747-scaffold710-1236741 20036645*<br/> snp49744-scaffold710-1107424 20167200<br/> snp49743-scaffold710-1073847 20200941*<br/> snp49742-scaffold710-1035063 20239512<br/> snp49741-scaffold710-1002906 20271740<br/> snp49740-scaffold710-974383 20300302</p> <p><u>30139296-30874402</u></p> <p>snp59004-scaffold968-1784874 30139296<br/> snp59005-scaffold968-1816117 30170190*<br/> snp59007-scaffold968-1927374 30282214<br/> snp59013-scaffold968-2181677 30541674<br/> snp59020-scaffold968-2472589 30831824*<br/> snp59021-scaffold968-2515154 30874402*</p> <p><u>36835876-36949805</u></p> <p>snp26737-scaffold281-187160 36835876<br/> snp26738-scaffold281-221127 36870090<br/> snp26739-scaffold281-267352 36916955 *<br/> snp26740-scaffold281-299943 36949805*<br/> snp26741-scaffold281-332466 36982221</p> <p><u>45415286-45625340</u></p> <p>snp12879-scaffold1498-8679 45415286<br/> snp12880-scaffold1498-47642 45452714*<br/> snp12881-scaffold1498-89673 45494742<br/> snp12882-scaffold1498-142431 45547830<br/> snp12883-scaffold1498-190653 45596401<br/> snp12884-scaffold1498-220976 45625340</p> <p><u>69082499-69758377</u></p> | <p>OAR6_42208195.1 37865761<br/> OAR6_42247197.1 37911182<br/> OAR6_42557643.1 38214635*<br/> OAR6_42743614.1 38345613<br/> OAR6_42930840.1 38480285<br/> OAR6_43034224.1 38567860*</p> | <p>OAR6_41003295.1 36747507*<br/> DU178311_404.1 36768153<br/> OAR6_41424992.1 37126564<br/> OAR6_41476497.1 37177538<br/> OAR6_41494878.1 37198398*<br/> OAR6_41558126.1 37257076<br/> OAR6_41583796.1 37282110<br/> OAR6_41709987.1 37400993<br/> OAR6_41768532.1 37455134<br/> OAR6_41936490.1 37619726<br/> OAR6_42094768.1 37756801</p> |
|------------------------------------------------------------------------------------------------------------------------------------------------------------------------------------------------------------------------------------------------------------------------------------------------------------------------------------------------------------------------------------------------------------------------------------------------------------------------------------------------------------------------------------------------------------------------------------------------------------------------------------------------------------------------------------------------------------------------------------------------------------------------------------------------------------------------------------------------------------------------------------------------------------------------------------------------------|----------------------------------------------------------------------------------------------------------------------------------------------------------------------------------------------------------------------------------------------------------------------------------------------------------------------------------------------------------------------------------------------------------------------------------------------------------------------------------------------------------------------------------------------------------------------------------------------------------------------------------------------------------------------------------------------------------------------------------------------------------------------------------------------------------------------------------------------------------------------------------------------------------------------------------------------------------------------------------------------------------------------------------------------------------------------------------------------------------------------------------------------------------------------------------------------------------------|-----------------------------------------------------------------------------------------------------------------------------------------------------------------------------------------|----------------------------------------------------------------------------------------------------------------------------------------------------------------------------------------------------------------------------------------------------------------------------------------------------------------------------------------------|

|       |                                                                                                                                                                                                                                                                                                                                                                                                                                                                                                                                                                                                                                                                                                                                                         |                                                                                                                                                                                                                                                                                                                                                                                                                                                                                                                                                                                                                                                                                                                                                                                |  |
|-------|---------------------------------------------------------------------------------------------------------------------------------------------------------------------------------------------------------------------------------------------------------------------------------------------------------------------------------------------------------------------------------------------------------------------------------------------------------------------------------------------------------------------------------------------------------------------------------------------------------------------------------------------------------------------------------------------------------------------------------------------------------|--------------------------------------------------------------------------------------------------------------------------------------------------------------------------------------------------------------------------------------------------------------------------------------------------------------------------------------------------------------------------------------------------------------------------------------------------------------------------------------------------------------------------------------------------------------------------------------------------------------------------------------------------------------------------------------------------------------------------------------------------------------------------------|--|
|       |                                                                                                                                                                                                                                                                                                                                                                                                                                                                                                                                                                                                                                                                                                                                                         | <p>snp58054-scaffold94-3761495 69082499<br/> <b>snp58060-scaffold94-3954937 69276841</b><br/> <b>snp58062-scaffold94-4076449 69398715</b><br/> <b>snp58063-scaffold94-4115460 69437556</b><br/> snp58065-scaffold94-4243148 69566293<br/> <b>snp58069-scaffold94-4434969 69758377*</b></p> <p><u><b>116501734-117144177</b></u></p> <p><b>snp16110-scaffold1698-5528 116501734</b><br/> snp16112-scaffold1698-77702 116572175<br/> snp16113-scaffold1698-116152 116608825<br/> snp16116-scaffold1698-266267 116756644<br/> <b>snp16117-scaffold1698-297420 116787929*</b><br/> snp16120-scaffold1698-458655 116929275<br/> <b>snp29345-scaffold3166-28105 117121013</b><br/> <b>snp29346-scaffold3166-62970 117131241</b><br/> <b>snp38582-scaffold4894-9087 117144177</b></p> |  |
| Chr 7 | <p><u><b>59624626-60848321</b></u></p> <p><b>snp30691-scaffold339-5649390 59624626</b><br/> <b>snp30688-scaffold339-5531611 59742326</b><br/> <b>snp30687-scaffold339-5490945 59782859</b><br/> snp30685-scaffold339-5400884 59873465<br/> <b>snp30682-scaffold339-5258982 60015475</b><br/> <b>snp30681-scaffold339-5230221 60044210</b><br/> <b>snp30680-scaffold339-5200334 60074382</b><br/> <b>snp30679-scaffold339-5167374 60107657*</b><br/> <b>snp30678-scaffold339-5138454 60136996</b><br/> snp30677-scaffold339-5071691 60205663<br/> <b>snp30675-scaffold339-4996663 60280996</b><br/> <b>snp30674-scaffold339-4962908 60315027</b><br/> <b>snp30673-scaffold339-4924262 60353593</b><br/> <b>snp30672-scaffold339-4888154 60388662</b></p> |                                                                                                                                                                                                                                                                                                                                                                                                                                                                                                                                                                                                                                                                                                                                                                                |  |

|       |                                                                                                                                                                                                                                                                                                                                                                                                                                                                                                                                                                                 |                                                                                                                                                                                                                                                                                                                                                                                                                                                                                                                                                                                                                                                                                                                                    |                                                                                                                                                                                                                                    |
|-------|---------------------------------------------------------------------------------------------------------------------------------------------------------------------------------------------------------------------------------------------------------------------------------------------------------------------------------------------------------------------------------------------------------------------------------------------------------------------------------------------------------------------------------------------------------------------------------|------------------------------------------------------------------------------------------------------------------------------------------------------------------------------------------------------------------------------------------------------------------------------------------------------------------------------------------------------------------------------------------------------------------------------------------------------------------------------------------------------------------------------------------------------------------------------------------------------------------------------------------------------------------------------------------------------------------------------------|------------------------------------------------------------------------------------------------------------------------------------------------------------------------------------------------------------------------------------|
|       | <b>snp30670-scaffold339-4796176 60480852</b><br><b>snp30669-scaffold339-4761615 60515404</b><br><b>snp30667-scaffold339-4673976 60603707</b><br><b>snp30663-scaffold339-4429271 60848321</b>                                                                                                                                                                                                                                                                                                                                                                                    |                                                                                                                                                                                                                                                                                                                                                                                                                                                                                                                                                                                                                                                                                                                                    |                                                                                                                                                                                                                                    |
| Chr 8 | <u><b>74894754-75321840</b></u><br><br>snp10557-scaffold1376-1305714 74894754<br><b>snp10556-scaffold1376-1245744 74954737</b><br><b>snp10555-scaffold1376-1193823 75006929</b><br><b>snp10554-scaffold1376-1159382 75041455*</b><br><b>snp10553-scaffold1376-1118888 75082828</b><br>snp10552-scaffold1376-1089536 75112213<br><b>snp10551-scaffold1376-1054710 75147070</b><br><b>snp10550-scaffold1376-1023594 75178621</b><br><b>snp10549-scaffold1376-984757 75217436</b><br><b>snp10548-scaffold1376-951770 75250756*</b><br><b>snp10546-scaffold1376-880604 75321840</b> | <u><b>74894754-75321840</b></u><br><br><b>snp10557-scaffold1376-1305714 74894754</b><br><b>snp10556-scaffold1376-1245744 74954737*</b><br><b>snp10554-scaffold1376-1159382 75041455</b><br>snp10553-scaffold1376-1118888 75082828<br>snp10551-scaffold1376-1054710 75147070<br><b>snp10548-scaffold1376-951770 75250756</b><br>snp10546-scaffold1376-880604 75321840<br><br><u><b>31846675-32220312</b></u><br><br><b>snp3828-scaffold1121-278677 31846675*</b><br><b>snp3825-scaffold1121-173930 31952477*</b><br><b>snp3824-scaffold1121-138568 31987692</b><br>snp3823-scaffold1121-95838 32030671<br><b>snp3822-scaffold1121-66026 32061108</b><br>snp3821-scaffold1121-32831 32094669<br>snp28582-scaffold3060-91473 32220312 | <u><b>62665338-63271621</b></u><br><br><b>OAR8_67529714.1 62665338*</b><br><b>s54005.1 62712894</b><br><b>OAR8_67633238.1 62766989</b><br><b>s21394.1 62941437*</b><br><b>OAR8_68132928.1 63271621</b>                             |
| Chr 9 |                                                                                                                                                                                                                                                                                                                                                                                                                                                                                                                                                                                 |                                                                                                                                                                                                                                                                                                                                                                                                                                                                                                                                                                                                                                                                                                                                    | <u><b>34730111-35192293</b></u><br><br><b>OAR9_36726320.1 34730111*</b><br><b>s73611.1 34779773*</b><br><b>OAR9_36817104.1 34825201</b><br><b>OAR9_37077743.1 35066451</b><br>s08861.1 35166051<br><b>OAR9_37208898.1 35192293</b> |

|        |                                                                                                                                                                                                                                                                                                                                                                              |                                                                                                                                                                                                                                                                                                                                                                                                                                                                                                                                                                                                                                                                                                                                                    |                                                                                                                                                                                                                                                                                                                                                                                                                                                                                                                                                                                                                                                                                                                                                                                                                     |                                                                                                                                                                                                                                                                                                                                                                                                                                                                                                                                                                                                                                                                                                                                                                                                                                                                                                                                                                                                                                                                                                                                                           |
|--------|------------------------------------------------------------------------------------------------------------------------------------------------------------------------------------------------------------------------------------------------------------------------------------------------------------------------------------------------------------------------------|----------------------------------------------------------------------------------------------------------------------------------------------------------------------------------------------------------------------------------------------------------------------------------------------------------------------------------------------------------------------------------------------------------------------------------------------------------------------------------------------------------------------------------------------------------------------------------------------------------------------------------------------------------------------------------------------------------------------------------------------------|---------------------------------------------------------------------------------------------------------------------------------------------------------------------------------------------------------------------------------------------------------------------------------------------------------------------------------------------------------------------------------------------------------------------------------------------------------------------------------------------------------------------------------------------------------------------------------------------------------------------------------------------------------------------------------------------------------------------------------------------------------------------------------------------------------------------|-----------------------------------------------------------------------------------------------------------------------------------------------------------------------------------------------------------------------------------------------------------------------------------------------------------------------------------------------------------------------------------------------------------------------------------------------------------------------------------------------------------------------------------------------------------------------------------------------------------------------------------------------------------------------------------------------------------------------------------------------------------------------------------------------------------------------------------------------------------------------------------------------------------------------------------------------------------------------------------------------------------------------------------------------------------------------------------------------------------------------------------------------------------|
| Chr 10 | <p><b><u>49806948-50111884</u></b></p> <p>snp48056-scaffold68-2052280 49806948<br/> <b>snp48057-scaffold68-2081562 49836347*</b><br/> <b>snp48058-scaffold68-2125826 49880369*</b><br/> <b>snp48059-scaffold68-2159758 49914964</b><br/> snp48061-scaffold68-2277132 50032968<br/> snp48062-scaffold68-2321770 50077763<br/> <b>snp48063-scaffold68-2355884 50111884</b></p> | <p><b><u>61579137-63362001</u></b></p> <p><b>snp33144-scaffold388-638006 61579137</b><br/> <b>snp33150-scaffold388-885658 61834915</b><br/> snp33163-scaffold388-1462914 62410197<br/> <b>snp33166-scaffold388-1627736 62575526 *</b><br/> snp33168-scaffold388-1694651 62643336<br/> <b>snp11201-scaffold1400-366987 62900522</b><br/> <b>snp11198-scaffold1400-225713 63042347</b><br/> <b>snp24945-scaffold2554-7579 63321283</b><br/> snp33726-scaffold397-1169 63330652<br/> <b>snp33727-scaffold397-32542 63362001</b></p> <p><b><u>71545588-71700461</u></b></p> <p>snp31014-scaffold343-340685 71545588<br/> snp31015-scaffold343-388340 71594906<br/> snp31016-scaffold343-426662 71633591*<br/> snp31017-scaffold343-492910 71700461</p> | <p><b><u>29479711-29940445</u></b></p> <p><b>OAR10_29538398.1 29479711*</b><br/> <b>OAR10_29722772.1 29660838</b><br/> <b>OAR10_29737372.1 29685665</b><br/> <b>OAR10_29793750.1 29742016</b><br/> <b>s18834.1 2977601*</b><br/> <b>OAR10_29867192.1 29812108</b><br/> <b>OAR10_30003563.1 29940445</b><br/> s47229.1 30099193<br/> s73573.1 30201353</p> <p><b><u>37941892-39043416</u></b></p> <p><b>OAR10_38772235.1 37941892</b><br/> <b>OAR10_38966500.1 38196759</b><br/> <b>OAR10_39356591.1 38481236*</b><br/> <b>OAR10_39377612.1 38504099</b><br/> <b>OAR10_39484055.1 38597569*</b><br/> <b>OAR10_39526423_X.1 38639728*</b><br/> OAR10_39573000.1 38685897<br/> s32389.1 38717908<br/> <b>OAR10_39630287.1 38741781</b><br/> <b>OAR10_39841998.1 39015113</b><br/> <b>OAR10_39875924.1 39043416</b></p> | <p><b><u>29413536-29776019</u></b></p> <p><b>OAR10_29469450.1 29413536</b><br/> <b>OAR10_29511510.1 29453722</b><br/> <b>OAR10_29538398.1 29479711*</b><br/> <b>OAR10_29546872.1 29489616</b></p> <p><b><u>38196759-39403332</u></b></p> <p>OAR10_38772235.1 37941892<br/> <b>OAR10_38966500.1 38196759</b><br/> <b>OAR10_39000561.1 38216203</b><br/> <b>OAR10_39356591.1 38481236</b><br/> <b>OAR10_39377612.1 38504099*</b><br/> <b>OAR10_39484055.1 38597569</b><br/> <b>OAR10_39526423_X.1 38639728*</b><br/> <b>OAR10_39573000.1 38685897*</b><br/> <b>OAR10_39630287.1 38741781</b><br/> <b>OAR10_39756558.1 38938375</b><br/> OAR10_39841998.1 39015113<br/> <b>OAR10_39875924.1 39043416</b><br/> <b>OAR10_39900534.1 39061704</b><br/> <b>OAR10_40027965.1 39201371</b><br/> OAR10_40036146.1 39202994<br/> OAR10_40078675.1 39246697<br/> <b>OAR10_40150757.1 39312880</b><br/> <b>OAR10_40237265.1 39403332</b></p> <p><b><u>42194236-43935671</u></b></p> <p>OAR10_43095152.1 42194236<br/> <b>OAR10_43161187.1 42263285</b><br/> OAR10_43195785.1 42297892<br/> <b>OAR10_43246818.1 42358254*</b><br/> <b>OAR10_43391432.1 42454938</b></p> |
|--------|------------------------------------------------------------------------------------------------------------------------------------------------------------------------------------------------------------------------------------------------------------------------------------------------------------------------------------------------------------------------------|----------------------------------------------------------------------------------------------------------------------------------------------------------------------------------------------------------------------------------------------------------------------------------------------------------------------------------------------------------------------------------------------------------------------------------------------------------------------------------------------------------------------------------------------------------------------------------------------------------------------------------------------------------------------------------------------------------------------------------------------------|---------------------------------------------------------------------------------------------------------------------------------------------------------------------------------------------------------------------------------------------------------------------------------------------------------------------------------------------------------------------------------------------------------------------------------------------------------------------------------------------------------------------------------------------------------------------------------------------------------------------------------------------------------------------------------------------------------------------------------------------------------------------------------------------------------------------|-----------------------------------------------------------------------------------------------------------------------------------------------------------------------------------------------------------------------------------------------------------------------------------------------------------------------------------------------------------------------------------------------------------------------------------------------------------------------------------------------------------------------------------------------------------------------------------------------------------------------------------------------------------------------------------------------------------------------------------------------------------------------------------------------------------------------------------------------------------------------------------------------------------------------------------------------------------------------------------------------------------------------------------------------------------------------------------------------------------------------------------------------------------|

|        |                                                                                                                                                                                                                                                                                                                                                                                                                                                                                                                                                                                                                                                                                                             |                                                                                                                                                                                               |                          |                                                                                                                                                                                                                                        |
|--------|-------------------------------------------------------------------------------------------------------------------------------------------------------------------------------------------------------------------------------------------------------------------------------------------------------------------------------------------------------------------------------------------------------------------------------------------------------------------------------------------------------------------------------------------------------------------------------------------------------------------------------------------------------------------------------------------------------------|-----------------------------------------------------------------------------------------------------------------------------------------------------------------------------------------------|--------------------------|----------------------------------------------------------------------------------------------------------------------------------------------------------------------------------------------------------------------------------------|
|        |                                                                                                                                                                                                                                                                                                                                                                                                                                                                                                                                                                                                                                                                                                             |                                                                                                                                                                                               |                          | OAR10_43407475.1 42468525<br>OAR10_43441368.1 42512611<br>OAR10_43550150.1 42650662<br>OAR10_43601954.1 42713204<br>OAR10_43626984_X.1 42735479<br>OAR10_44407983.1 43782188<br>OAR10_44470993.1 43845305<br>OAR10_44569028.1 43935671 |
| Chr 11 | <u>37793580-38186897</u><br><br>snp24199-scaffold247-290385 37793580<br>snp24200-scaffold247-348793 37852358*<br>snp24201-scaffold247-416001 37920009*<br>snp24202-scaffold247-451263 37955407<br>snp24203-scaffold247-491893 37996657*<br>snp24204-scaffold247-523077 38027819*<br>snp24205-scaffold247-567391 38072888*<br>snp24206-scaffold247-602548 38108083<br>snp24208-scaffold247-681263 38186897<br><br><u>61247655-61456836</u><br><br>snp18100-scaffold185-12622205 61247655*<br>snp18099-scaffold185-12591335 61278930*<br>snp18098-scaffold185-12562590 61308199<br>snp18097-scaffold185-12494429 61379162<br>snp18096-scaffold185-12445655 61427940<br>snp18095-scaffold185-12416881 61456836 | <u>48845878-49036557</u><br><br>snp3591-scaffold1111-454455 48845878<br>snp3592-scaffold1111-496847 48888368<br>snp3594-scaffold1111-599861 48991424*<br>snp3595-scaffold1111-644798 49036557 |                          |                                                                                                                                                                                                                                        |
| Chr 12 | <u>43598089-44471339</u>                                                                                                                                                                                                                                                                                                                                                                                                                                                                                                                                                                                                                                                                                    | <u>60637258-60950668</u>                                                                                                                                                                      | <u>38573067-39683281</u> |                                                                                                                                                                                                                                        |

snp55336-scaffold855-17875 43598089  
snp53668-scaffold817-874431 43916255  
snp53666-scaffold817-776660 44012257  
snp53665-scaffold817-739382 44050377  
snp53664-scaffold817-708766 44081824\*  
snp53663-scaffold817-677742 44113302  
snp53662-scaffold817-625200 44165707\*  
snp53661-scaffold817-570565 44221034  
snp53660-scaffold817-516359 44275453  
snp53659-scaffold817-464982 44327480  
snp53657-scaffold817-364334 44429883  
snp53656-scaffold817-324137 44471339

48839256-51252236

snp11147-scaffold140-984058 48839256  
snp11146-scaffold140-931318 48893166  
snp11142-scaffold140-760668 49066547  
snp11141-scaffold140-711242 49116716  
snp11135-scaffold140-435808 49396564  
snp11128-scaffold140-65176 49775064  
snp11127-scaffold140-35215 49805838  
snp11126-scaffold140-2873 49837948  
snp30388-scaffold335-708 49846240  
snp30389-scaffold335-38638 49884682  
snp30390-scaffold335-79561 49926025  
snp30391-scaffold335-171300 50018490  
snp30392-scaffold335-200469 50047466  
snp30393-scaffold335-255434 50102642  
snp30394-scaffold335-315825 50152165  
snp30395-scaffold335-354367 50190714  
snp30396-scaffold335-385244 50221592  
snp30397-scaffold335-418126 50253401  
snp30398-scaffold335-469650 50304848  
snp30399-scaffold335-501928 50327948\*  
snp30400-scaffold335-530813 50356882  
snp30402-scaffold335-625380 50451600\*

snp50177-scaffold717-4519853 60637258\*  
snp50175-scaffold717-4447356 60710546  
snp50172-scaffold717-4328533 60829727  
snp50171-scaffold717-4286071 60872237  
snp50170-scaffold717-4247907 60910543\*  
snp50169-scaffold717-4207960 60950668\*

62109741-62503627

snp50143-scaffold717-3039794 62109741\*  
snp50140-scaffold717-2929052 62221458  
snp50138-scaffold717-2864241 62286750  
snp50133-scaffold717-2645969 62503627

OAR12\_43059012.1 38573067  
OAR12\_43069135.1 38584294  
OAR12\_43331187.1 38845652\*  
OAR12\_43408733.1 38925278  
OAR12\_43836490.1 39266000  
OAR12\_44013347.1 39430517  
OAR12\_44173454.1 39590218  
s01697.1 39683281

|        |                                                                                                                                                                                                                                                                                                                                                                                                                                                                                                                                                                                                                                                                                                                                                                                                                                                                                                                                                                                                                                                                                                                                                   |  |                                                                                                                                                                                                              |                                                                                                                                                                                                      |
|--------|---------------------------------------------------------------------------------------------------------------------------------------------------------------------------------------------------------------------------------------------------------------------------------------------------------------------------------------------------------------------------------------------------------------------------------------------------------------------------------------------------------------------------------------------------------------------------------------------------------------------------------------------------------------------------------------------------------------------------------------------------------------------------------------------------------------------------------------------------------------------------------------------------------------------------------------------------------------------------------------------------------------------------------------------------------------------------------------------------------------------------------------------------|--|--------------------------------------------------------------------------------------------------------------------------------------------------------------------------------------------------------------|------------------------------------------------------------------------------------------------------------------------------------------------------------------------------------------------------|
|        | <p>snp30403-scaffold335-692736 50515766*</p> <p>snp30404-scaffold335-730262 50553986</p> <p>snp30405-scaffold335-772607 50596847</p> <p>snp30406-scaffold335-807385 50631622</p> <p>snp30407-scaffold335-852300 50676638</p> <p>snp30410-scaffold335-988243 50813753</p> <p>snp30411-scaffold335-1024805 50849395</p> <p>snp30412-scaffold335-1063925 50888523</p> <p>snp30413-scaffold335-1113038 50937829</p> <p>snp30414-scaffold335-1149164 50971205</p> <p><b>snp30415-scaffold335-1248178 51070302</b></p> <p>snp30416-scaffold335-1279037 51101199</p> <p>snp30419-scaffold335-1430456 51252236</p> <p><b><u>60391688-60950668</u></b></p> <p>snp50183-scaffold717-4762486 60391688</p> <p>snp50182-scaffold717-4723901 60430663</p> <p>snp50181-scaffold717-4685676 60468859</p> <p>snp50179-scaffold717-4583525 60571662</p> <p>snp50178-scaffold717-4551817 60605463</p> <p><b>snp50175-scaffold717-4447356 60710546</b></p> <p><b>snp50172-scaffold717-4328533 60829727</b></p> <p>snp50171-scaffold717-4286071 60872237</p> <p><b>snp50170-scaffold717-4247907 60910543*</b></p> <p><b>snp50169-scaffold717-4207960 60950668*</b></p> |  |                                                                                                                                                                                                              |                                                                                                                                                                                                      |
| Chr 13 | <p><b><u>46458560-46473488</u></b></p> <p>snp56302-scaffold881-1647723 46458560</p> <p>snp56304-scaffold881-1648328 46459167</p> <p>snp56308-scaffold881-1657525 46468393</p> <p>snp56310-scaffold881-1658893 46469761</p> <p>snp56312-scaffold881-1659181 46470049*</p>                                                                                                                                                                                                                                                                                                                                                                                                                                                                                                                                                                                                                                                                                                                                                                                                                                                                          |  | <p><b><u>48552093-49208171</u></b></p> <p>OAR13_51852034.1 48552093</p> <p>OAR13_51886803.1 48585294</p> <p>OAR13_52092653.1 48761402</p> <p>OAR13_52482285.1 48935908</p> <p>OAR13_52630089.1 49070447*</p> | <p><b><u>48552093-49070447</u></b></p> <p>OAR13_51852034.1 48552093*</p> <p>OAR13_51886803.1 48585294</p> <p>OAR13_52092653.1 48761402</p> <p>s27419.1 48897111</p> <p>OAR13_52482285.1 48935908</p> |



|        |                                                                                                                                                                                                                                                                                                                                                                                                                                                                                   |  |                                                                                                                                                                                                                                                                                                                                                                                                                                                                                                                          |                                  |
|--------|-----------------------------------------------------------------------------------------------------------------------------------------------------------------------------------------------------------------------------------------------------------------------------------------------------------------------------------------------------------------------------------------------------------------------------------------------------------------------------------|--|--------------------------------------------------------------------------------------------------------------------------------------------------------------------------------------------------------------------------------------------------------------------------------------------------------------------------------------------------------------------------------------------------------------------------------------------------------------------------------------------------------------------------|----------------------------------|
|        | <p>snp56315-scaffold881-1659399 46470267<br/> snp56317-scaffold881-1659485 46470353<br/> snp56318-scaffold881-1660022 46470890<br/> snp56319-scaffold881-1662266 46473134<br/> snp56320-scaffold881-1662295 46473163<br/> snp56322-scaffold881-1662620 46473488</p>                                                                                                                                                                                                               |  | <p>OAR13_52594105.1 49082829<br/> OAR13_52640992.1 49137513*<br/> OAR13_52723941.1 49208171</p> <p><u>55025081-56301025</u></p> <p>s73781.1 55025081<br/> s44347.1 55413774<br/> OAR13_60486404.1 55415559<br/> OAR13_60759835.1 55773534<br/> s47781.1 55823232<br/> OAR13_60855392.1 55877764<br/> OAR13_60893851.1 55918326<br/> s13640.1 56301025*</p> <p><u>57302923-57809890</u></p> <p>s35407.1 57302923<br/> s18305.1 57332790<br/> OAR13_62551597.1 57339112<br/> s32799.1 57571809<br/> s63169.1 57809890*</p> | <p>OAR13_52630089.1 49070447</p> |
| Chr 14 | <p><u>16942897-17652266</u></p> <p>snp42629-scaffold566-2157875 16942897<br/> snp42627-scaffold566-2087522 17014833<br/> snp42626-scaffold566-2037573 17064867*<br/> snp42624-scaffold566-1939716 17163042*<br/> snp42622-scaffold566-1844989 17258805<br/> snp42620-scaffold566-1767368 17334795<br/> snp42618-scaffold566-1682208 17420173<br/> snp42617-scaffold566-1618985 17483834<br/> snp42616-scaffold566-1587537 17515692<br/> snp42615-scaffold566-1545022 17558651</p> |  |                                                                                                                                                                                                                                                                                                                                                                                                                                                                                                                          |                                  |

|        |                                                                                                                                                                                                                                                                          |                                                                                                                                                                                                                                                                                                                                                                                                                                                                                                                                                                    |                                                                                                                                                                                                |
|--------|--------------------------------------------------------------------------------------------------------------------------------------------------------------------------------------------------------------------------------------------------------------------------|--------------------------------------------------------------------------------------------------------------------------------------------------------------------------------------------------------------------------------------------------------------------------------------------------------------------------------------------------------------------------------------------------------------------------------------------------------------------------------------------------------------------------------------------------------------------|------------------------------------------------------------------------------------------------------------------------------------------------------------------------------------------------|
|        | snp42614-scaffold566-1452334 17652266                                                                                                                                                                                                                                    |                                                                                                                                                                                                                                                                                                                                                                                                                                                                                                                                                                    |                                                                                                                                                                                                |
| Chr 15 |                                                                                                                                                                                                                                                                          | <p><b><u>6473101-6606528</u></b></p> <p>snp40417-scaffold516-614362 6473101<br/> snp40416-scaffold516-558833 6528574*<br/> snp40415-scaffold516-526881 6560526*<br/> snp40414-scaffold516-480259 6606528</p> <p><b><u>30213116-30556088</u></b></p> <p>snp1696-scaffold1048-61993 30213116<br/> snp41709-scaffold542-3016217 30310244*<br/> snp41708-scaffold542-2933956 30393252<br/> snp41707-scaffold542-2884418 30441621<br/> snp41706-scaffold542-2845412 30481062<br/> snp41705-scaffold542-2802565 30524299<br/> snp41704-scaffold542-2770868 30556088*</p> | <p><b><u>59813250-60219075</u></b></p> <p>OAR15_65397148.1 59813250<br/> OAR15_65467094_X.1 59869594<br/> OAR15_65536256.1 59929380<br/> OAR15_65584079.1 59981575*<br/> s56927.1 60219075</p> |
| Chr 17 |                                                                                                                                                                                                                                                                          |                                                                                                                                                                                                                                                                                                                                                                                                                                                                                                                                                                    | <p><b><u>55110665-55329873</u></b></p> <p>OAR17_60138319.1 55110665*<br/> OAR17_60143832.1 55116388*<br/> OAR17_60225378.1 55179421<br/> s00902.1 55329873</p>                                 |
| Chr 18 | <p><b><u>36054355-37092141</u></b></p> <p>snp22639-scaffold225-669244 36054355<br/> snp22636-scaffold225-501605 36221683<br/> snp22635-scaffold225-468855 36254528<br/> <b>snp22633-scaffold225-401770 36321627</b><br/> <b>snp22630-scaffold225-275173 36448079</b></p> |                                                                                                                                                                                                                                                                                                                                                                                                                                                                                                                                                                    | <p><b><u>66257896-68025345</u></b></p> <p>s10898.1 66257896<br/> s43273.1 66283067<br/> OAR18_70439577_X.1 66321715*<br/> s59254.1 66841063<br/> DU396708_413.1 66925898</p>                   |

|        |                                                                                                                                                                                                                                                                                                                                                                                                                                                                                                                                                                                                                                                                                                                                                                                                                                                                                                                                           |  |                                                                                                                                                                                                                                                        |  |
|--------|-------------------------------------------------------------------------------------------------------------------------------------------------------------------------------------------------------------------------------------------------------------------------------------------------------------------------------------------------------------------------------------------------------------------------------------------------------------------------------------------------------------------------------------------------------------------------------------------------------------------------------------------------------------------------------------------------------------------------------------------------------------------------------------------------------------------------------------------------------------------------------------------------------------------------------------------|--|--------------------------------------------------------------------------------------------------------------------------------------------------------------------------------------------------------------------------------------------------------|--|
|        | <p>snp22627-scaffold225-125543 36598178*<br/> snp22626-scaffold225-94485 36629376*<br/> snp22625-scaffold225-48106 36674199<br/> snp7213-scaffold1266-2438708 36745379<br/> snp7212-scaffold1266-2397446 36786664*<br/> snp7211-scaffold1266-2368797 36815394*<br/> snp7210-scaffold1266-2322163 36862059*<br/> snp7209-scaffold1266-2252567 36931726*<br/> snp7208-scaffold1266-2217995 36966108*<br/> snp7207-scaffold1266-2177748 37006519</p> <p><b><u>39636636-39980690</u></b></p> <p>snp9593-scaffold1344-443953 39636636<br/> snp9594-scaffold1344-484533 39665961<br/> <b>snp9595-scaffold1344-523130 39704456*</b><br/> <b>snp9596-scaffold1344-574879 39758374*</b><br/> <b>snp9597-scaffold1344-624191 39807767*</b><br/> <b>snp9598-scaffold1344-658729 39842792*</b><br/> <b>snp9599-scaffold1344-690205 39874628</b><br/> <b>snp9600-scaffold1344-741295 39926740</b><br/> <b>snp9601-scaffold1344-794509 39980690</b></p> |  | <p>s48176.1 67190301<br/> <b>OAR18_71769962.1 67554481</b><br/> s34796.1 67809480*<br/> s03219.1 68025345</p>                                                                                                                                          |  |
| Chr 19 | <p><b><u>32969117-33274858</u></b></p> <p>snp28431-scaffold303-2935885 32969117<br/> <b>snp28432-scaffold303-2995232 33028814</b><br/> <b>snp28433-scaffold303-3044995 33078622</b><br/> <b>snp28436-scaffold303-3170123 33202721*</b><br/> <b>snp28437-scaffold303-3243981 33274858</b></p>                                                                                                                                                                                                                                                                                                                                                                                                                                                                                                                                                                                                                                              |  | <p><b><u>28133753-28962852</u></b></p> <p><b>OAR19_29758110.1 28133753*</b><br/> OAR19_29776311.1 28153652<br/> <b>s37139.1 28594822</b><br/> <b>s10229.1 28632951</b><br/> <b>OAR19_30435043.1 28786157</b><br/> <b>OAR19_30535417.1 28962852</b></p> |  |
| Chr 20 | <p><b><u>13992024-14204949</u></b></p> <p><b>snp43213-scaffold575-1038863 13992024*</b></p>                                                                                                                                                                                                                                                                                                                                                                                                                                                                                                                                                                                                                                                                                                                                                                                                                                               |  |                                                                                                                                                                                                                                                        |  |

|        |                                                                                                                                                                                                                                                                                                                                                                                                                                                                                                                                                                                                                                                                                                                                                          |  |  |                                                                                                                                                                                                                                                                              |
|--------|----------------------------------------------------------------------------------------------------------------------------------------------------------------------------------------------------------------------------------------------------------------------------------------------------------------------------------------------------------------------------------------------------------------------------------------------------------------------------------------------------------------------------------------------------------------------------------------------------------------------------------------------------------------------------------------------------------------------------------------------------------|--|--|------------------------------------------------------------------------------------------------------------------------------------------------------------------------------------------------------------------------------------------------------------------------------|
|        | <b>snp43214-scaffold575-1067749 14021075</b><br><b>snp43215-scaffold575-1103515 14056838*</b><br><b>snp43216-scaffold575-1149259 14103234*</b><br><b>snp43217-scaffold575-1178652 14132568*</b><br><b>snp43218-scaffold575-1250834 14204949</b>                                                                                                                                                                                                                                                                                                                                                                                                                                                                                                          |  |  |                                                                                                                                                                                                                                                                              |
| Chr 21 |                                                                                                                                                                                                                                                                                                                                                                                                                                                                                                                                                                                                                                                                                                                                                          |  |  | <u>17885334-18117515</u><br><br><b>OAR21_20255140_X.1 17885334</b><br><b>s23216.1 17896095*</b><br><b>OAR21_20293826.1 17924936</b><br><b>OAR21_20301210.1 17931634*</b><br><b>OAR21_20371526.1 18002035</b><br><b>OAR21_20401829.1 18030662</b><br><b>s62605.1 18117515</b> |
| Chr 22 | <u>28867395-29079702</u><br><br><b>snp3022-scaffold1091-866051 28867395</b><br><b>snp3023-scaffold1091-919725 28921320*</b><br><b>snp3024-scaffold1091-953204 28955150*</b><br><b>snp3025-scaffold1091-1001799 29004527*</b><br><b>snp3026-scaffold1091-1047549 29050298</b><br><b>snp3027-scaffold1091-1076915 29079702</b><br><br><u>33594470-34062919</u><br><br><b>snp13803-scaffold154-526016 33594470</b><br><b>snp13800-scaffold154-407557 33709623</b><br><b>snp13799-scaffold154-347555 33769647</b><br><b>snp13798-scaffold154-300085 33818637</b><br><b>snp13797-scaffold154-243475 33876201</b><br><b>snp13796-scaffold154-213942 33905179</b><br><b>snp13795-scaffold154-182886 33936550</b><br><b>snp13794-scaffold154-139936 33979489</b> |  |  |                                                                                                                                                                                                                                                                              |

|        |                                                                                                                                                                                                                                                                                                                                                                                                                                                                                                                                  |                                                                                                                                                                                                                                                                                |                                                                                                                                                                                                                                                   |
|--------|----------------------------------------------------------------------------------------------------------------------------------------------------------------------------------------------------------------------------------------------------------------------------------------------------------------------------------------------------------------------------------------------------------------------------------------------------------------------------------------------------------------------------------|--------------------------------------------------------------------------------------------------------------------------------------------------------------------------------------------------------------------------------------------------------------------------------|---------------------------------------------------------------------------------------------------------------------------------------------------------------------------------------------------------------------------------------------------|
|        | <b>snp13793-scaffold154-98284 34020913*</b><br><b>snp13792-scaffold154-56173 34062919</b>                                                                                                                                                                                                                                                                                                                                                                                                                                        |                                                                                                                                                                                                                                                                                |                                                                                                                                                                                                                                                   |
| Chr 23 | <u><b>36461204-36962562</b></u><br><br><b>snp59312-scaffold975-869095 36461204</b><br><b>snp59311-scaffold975-838707 36491546*</b><br><b>snp59310-scaffold975-794737 36534387</b><br>snp59309-scaffold975-765057 36564031<br><b>snp59308-scaffold975-735328 36594106</b><br>snp59307-scaffold975-682257 36642064<br>snp59299-scaffold975-362386 36962562                                                                                                                                                                         | <u><b>39855572-40059589</b></u><br><br><b>snp23559-scaffold2376-180998 39855572</b><br><b>snp23560-scaffold2376-217634 39892708</b><br>snp23561-scaffold2376-253763 39928817<br><b>snp23562-scaffold2376-312530 39987612*</b><br><b>snp23563-scaffold2376-384575 40059589*</b> |                                                                                                                                                                                                                                                   |
| Chr 25 | <u><b>30481819-30744262</b></u><br><br><b>snp9550-scaffold1343-2237381 30481819</b><br><b>snp9551-scaffold1343-2270352 30514941*</b><br>snp9553-scaffold1343-2330570 30576113<br><b>snp9554-scaffold1343-2381252 30626531</b><br><b>snp9556-scaffold1343-2459116 30704234</b><br>snp9557-scaffold1343-2499155 30744262                                                                                                                                                                                                           |                                                                                                                                                                                                                                                                                | <u><b>19073058-19380300</b></u><br><br>OAR25_19823535.1 19073058<br>OAR25_19926183.1 19174899<br>OAR25_19941944.1 19190707<br>OAR25_20026839.1 19273755*<br>OAR25_20041897.1 19290987*<br>OAR25_20106030.1 19342453*<br>OAR25_20142347.1 19380300 |
| Chr 26 | <u><b>28596734-29498263</b></u><br><br>snp41096-scaffold532-288303 28596734<br><b>snp41097-scaffold532-332094 28640088</b><br><b>snp41098-scaffold532-368969 28677110</b><br><b>snp41099-scaffold532-409992 28717972</b><br>snp41100-scaffold532-448160 28756401<br>snp41101-scaffold532-481203 28788742<br>snp41104-scaffold532-649324 28957011<br>snp41105-scaffold532-692721 29001092<br>snp41109-scaffold532-897192 29205431<br><b>snp41110-scaffold532-933054 29241421*</b><br><b>snp41111-scaffold532-965874 29274605*</b> |                                                                                                                                                                                                                                                                                |                                                                                                                                                                                                                                                   |

|                                                                                                                                                                                      |  |  |  |
|--------------------------------------------------------------------------------------------------------------------------------------------------------------------------------------|--|--|--|
| <b>snp41112-scaffold532-1001039 29309963</b><br>snp41113-scaffold532-1051457 29360578<br><b>snp41114-scaffold532-1082302 29391742</b><br><b>snp41117-scaffold532-118800329498263</b> |  |  |  |
|--------------------------------------------------------------------------------------------------------------------------------------------------------------------------------------|--|--|--|

The beginning and end of each signature is indicated in base pairs and underlined; SNPs showing p-value $<10^{-6}$  are indicated for each signature; in bold SNPs showing p-value $<1.10^{-9}$ ; \*SNPs showing highest p-values of the signatures.

# Supplementary Table 6

GOAT

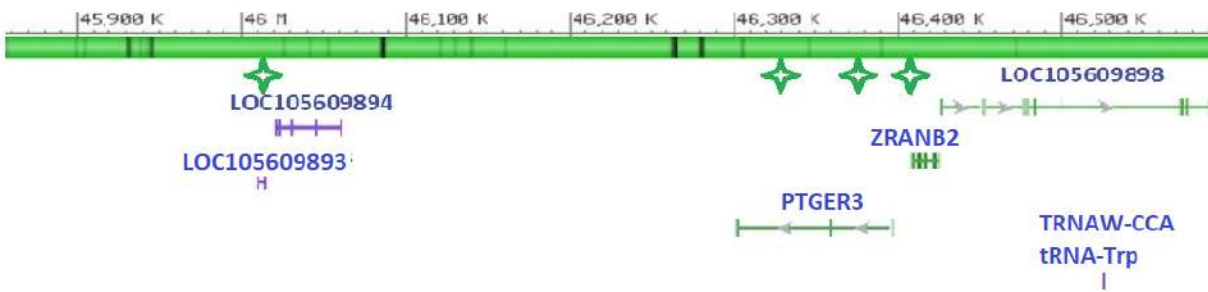

Chr. 1

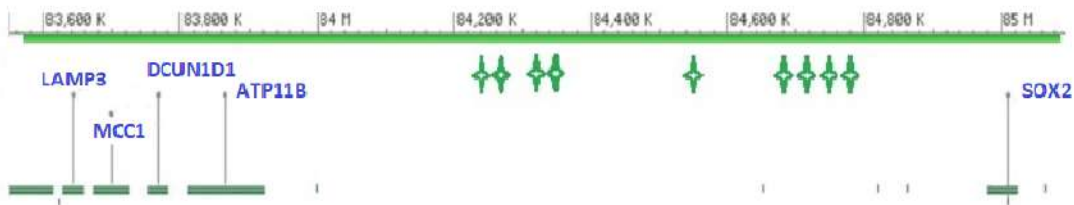

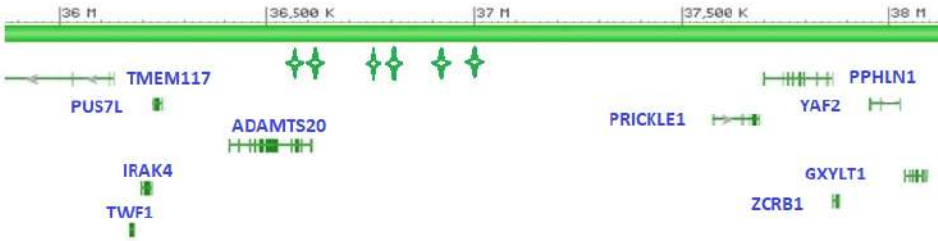

Chr. 5

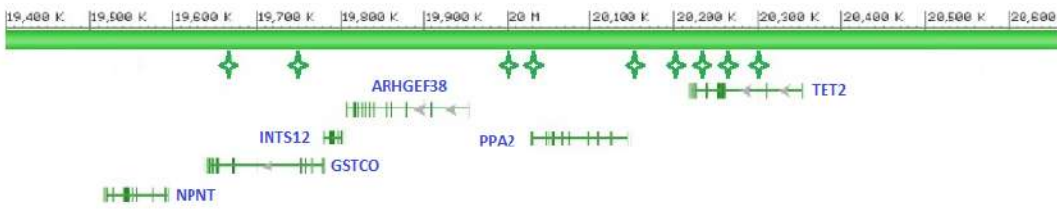

Chr. 6



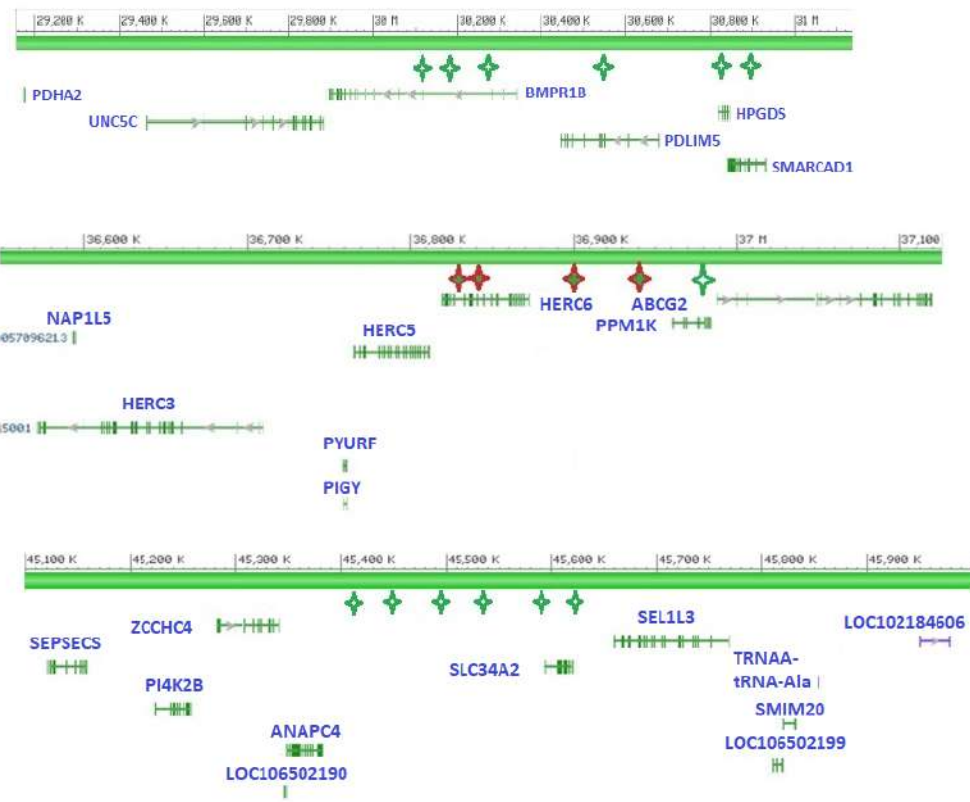

Chr. 6

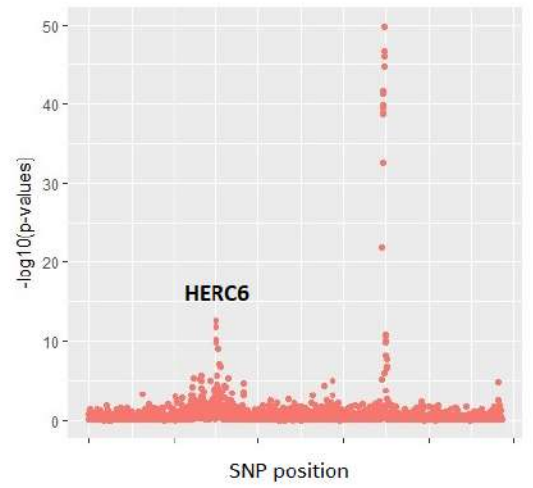

Chr. 6

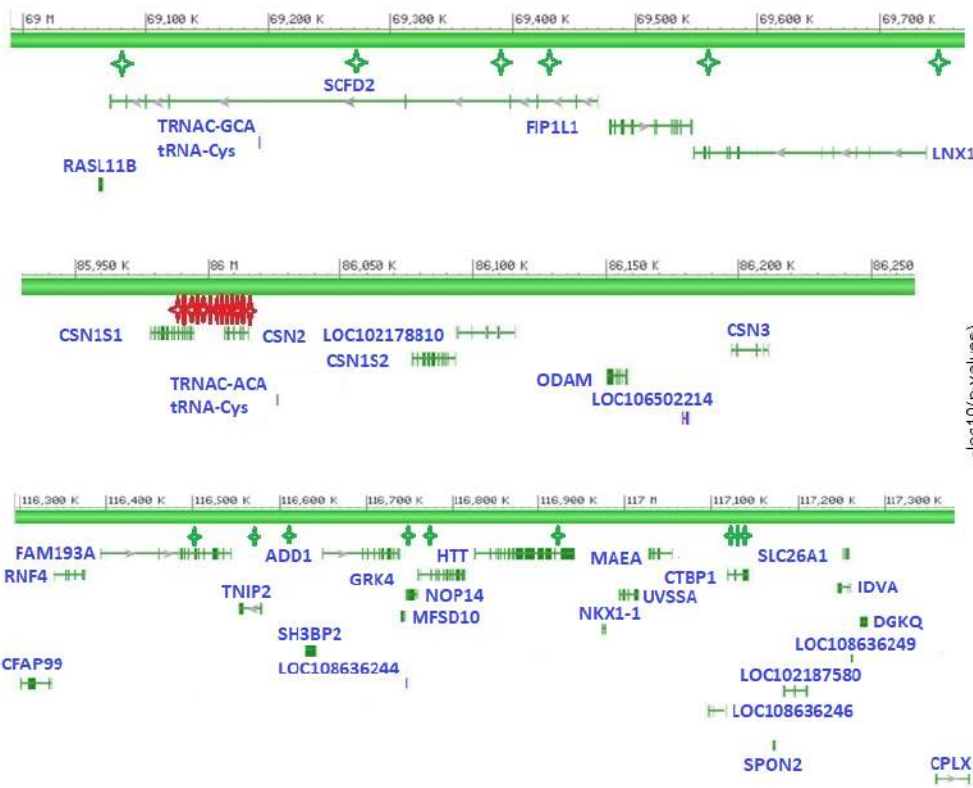

Chr. 6

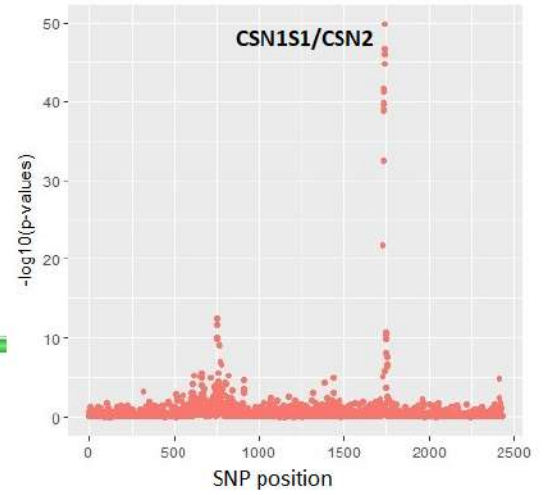

Chr. 6

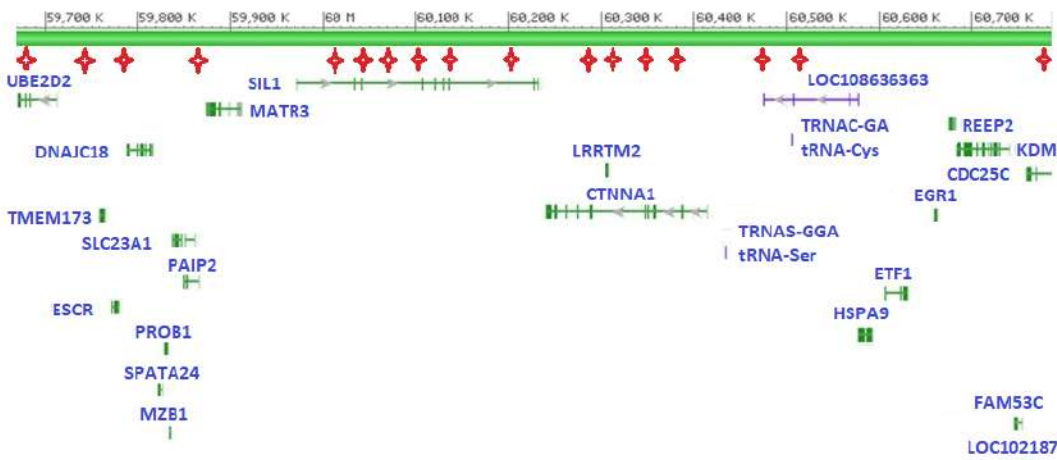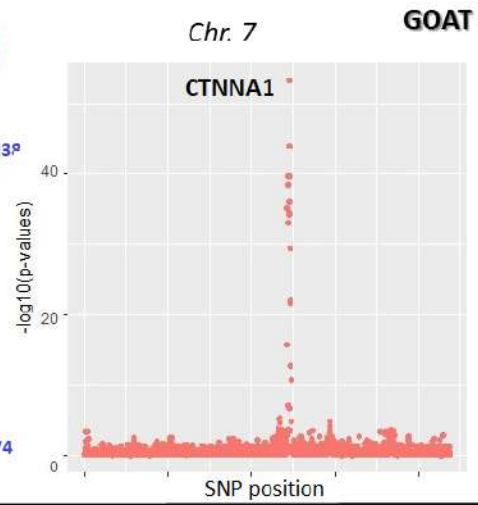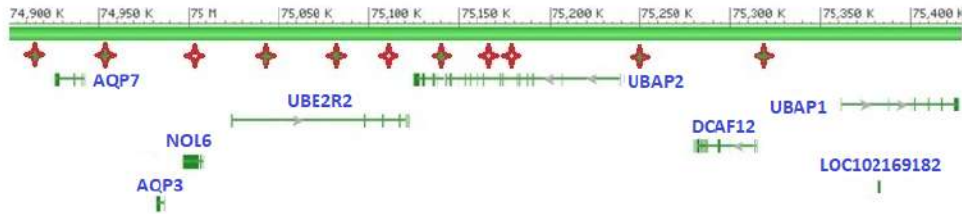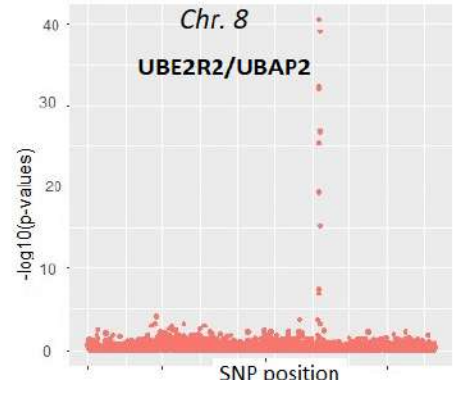

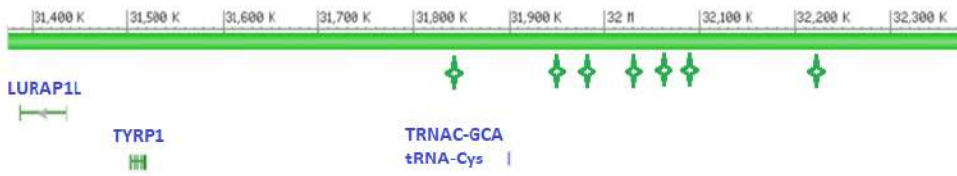

Chr. 8

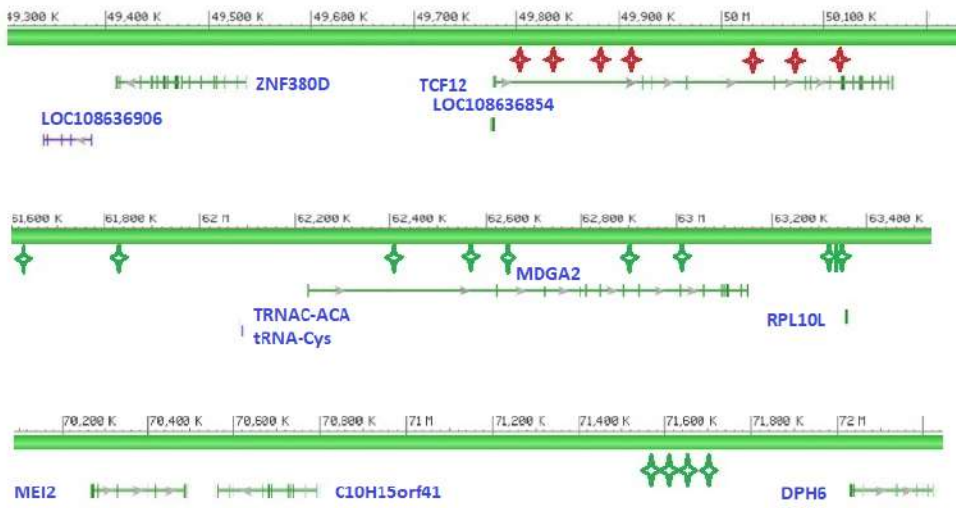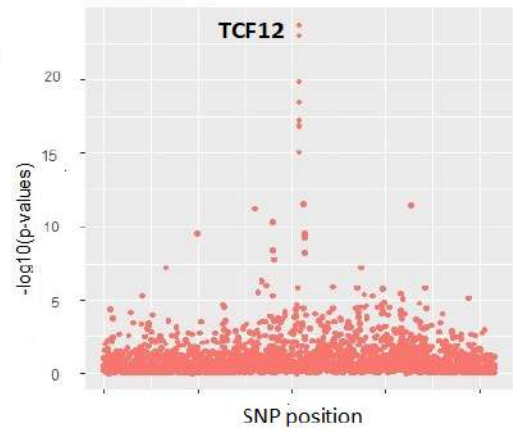

Chr. 10

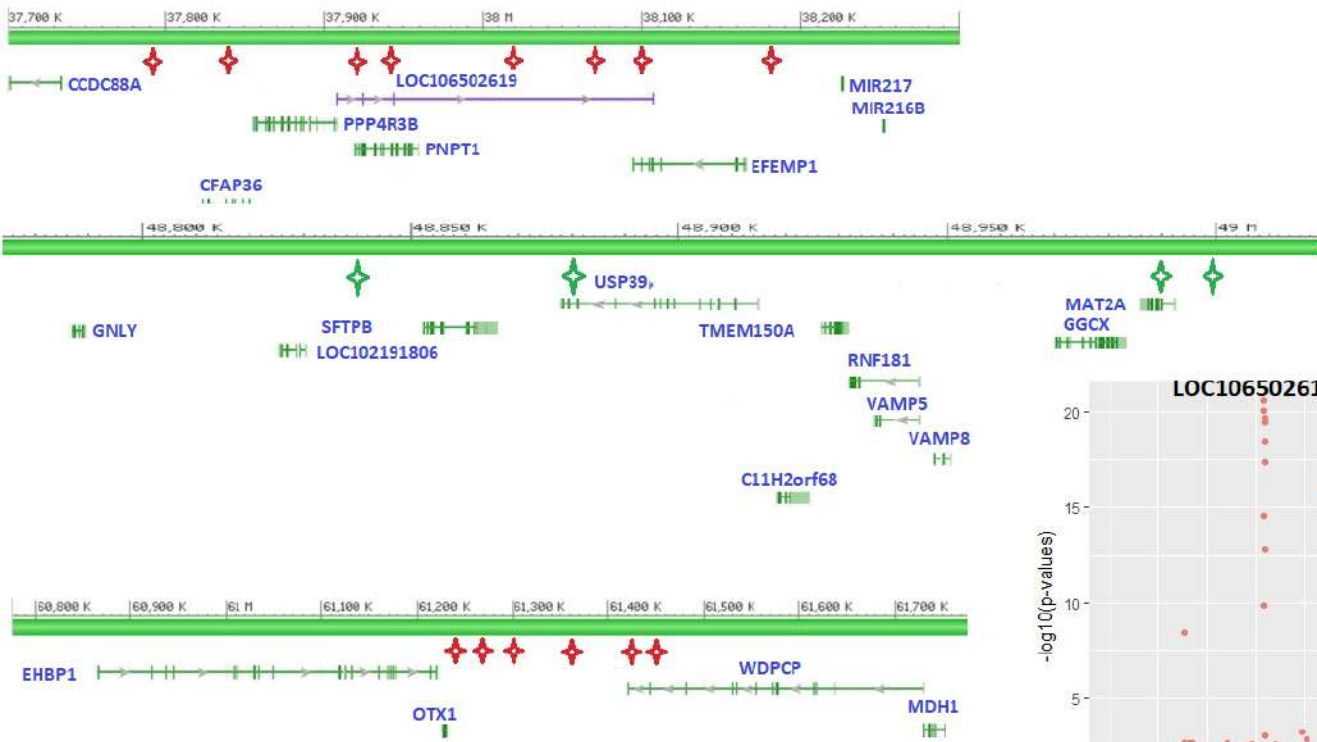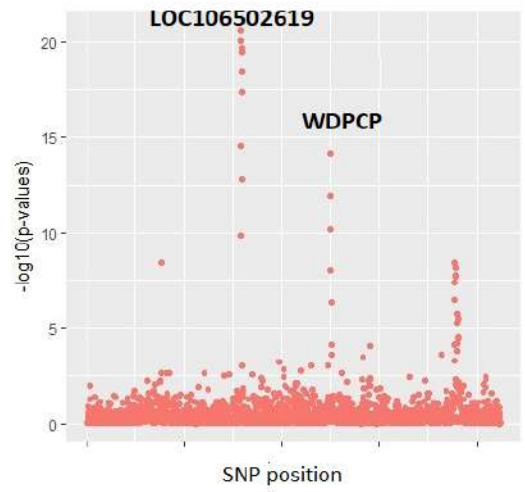

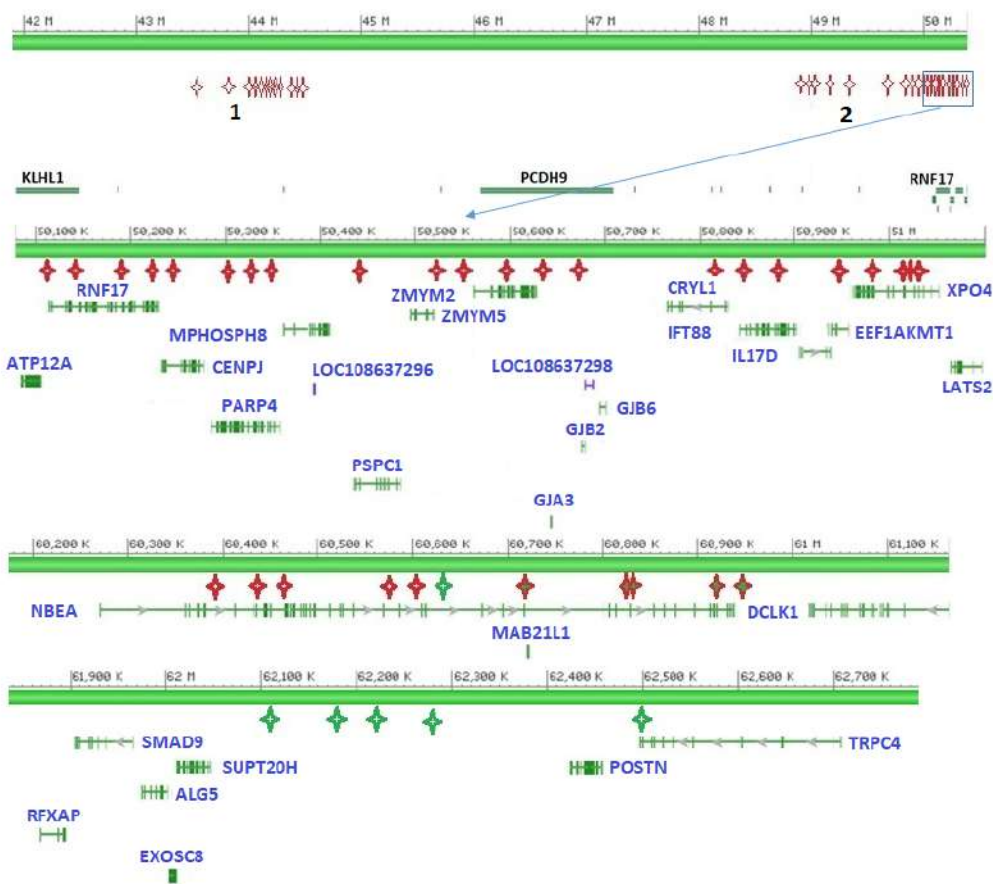

Chr. 12

GOAT

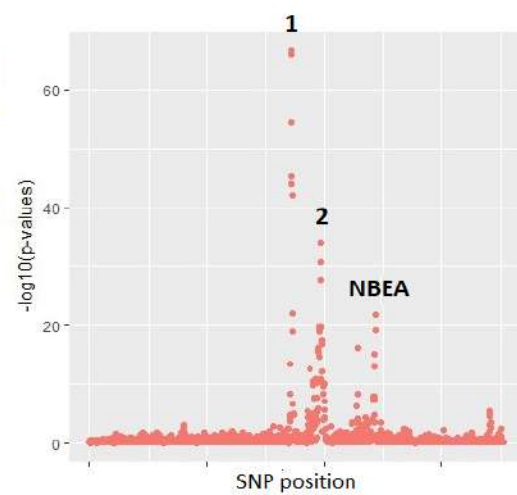

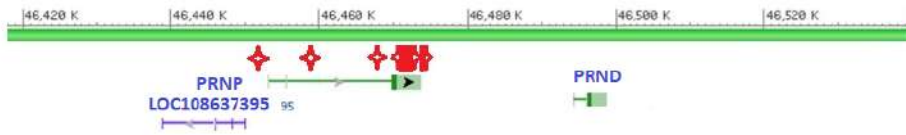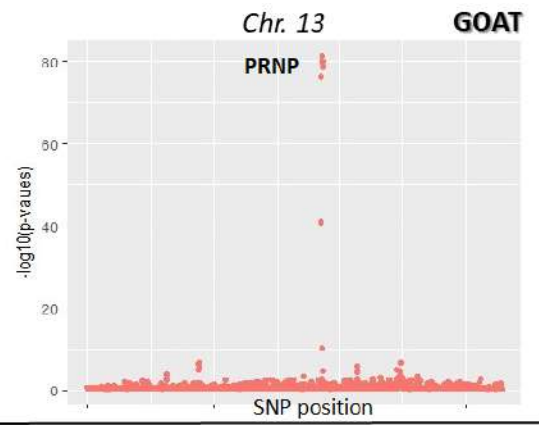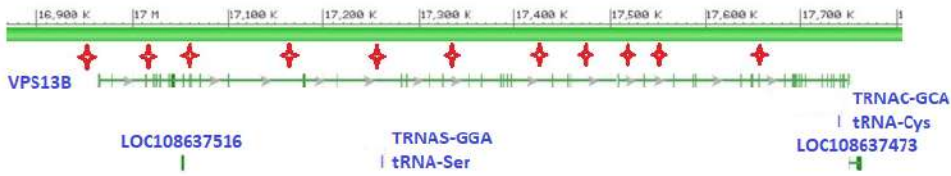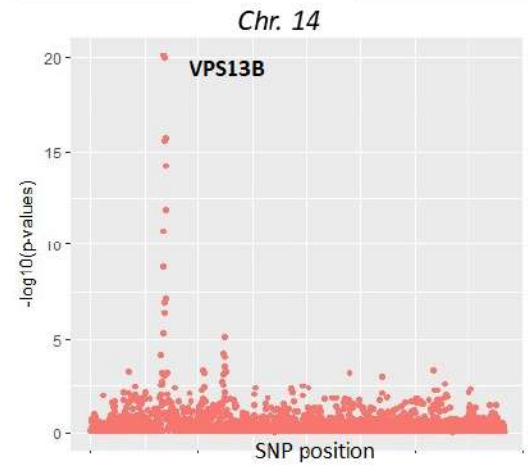

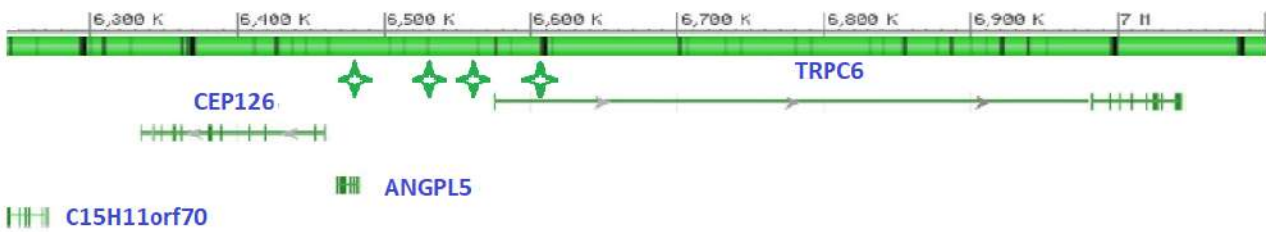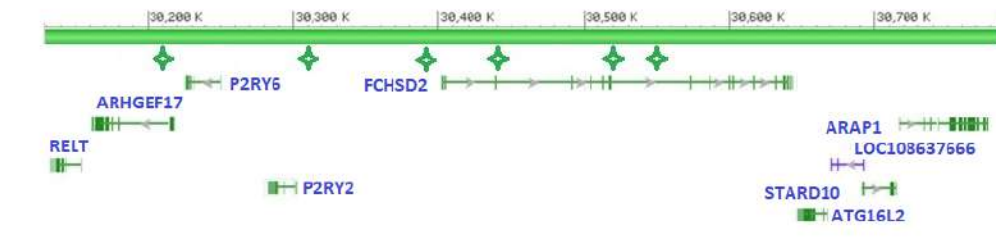

Chr. 15



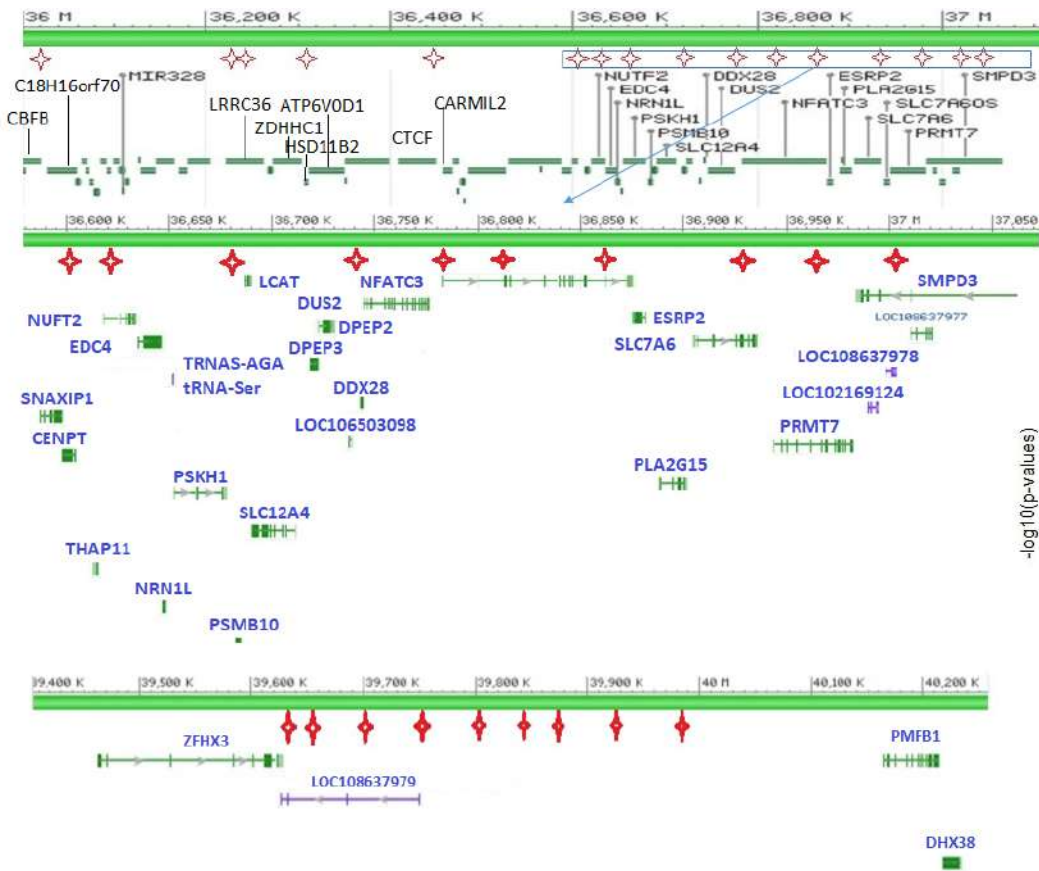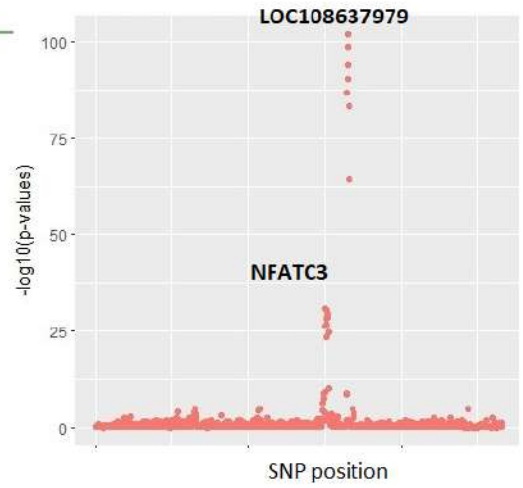

Chr. 19

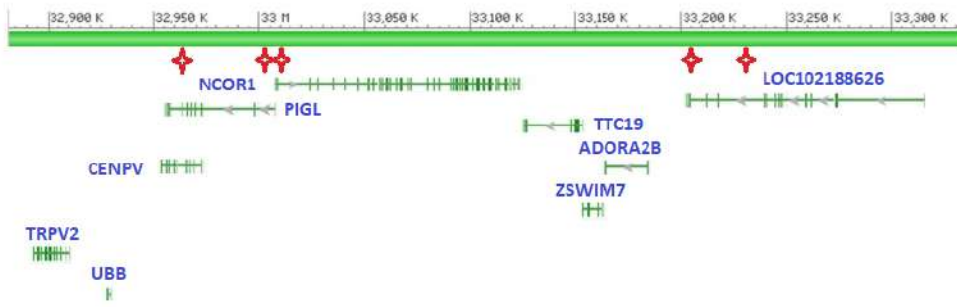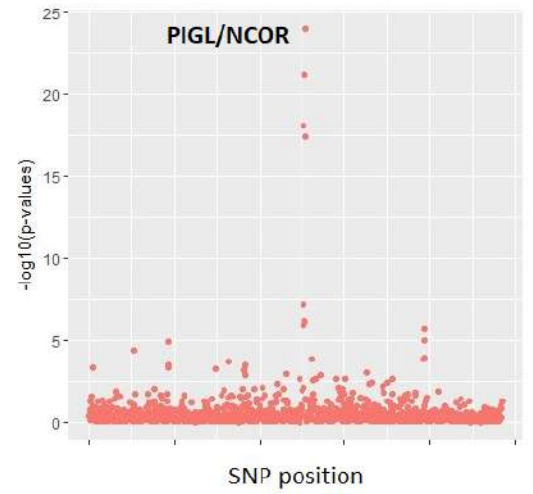

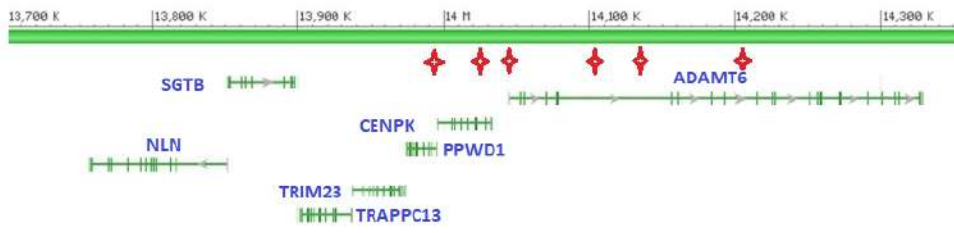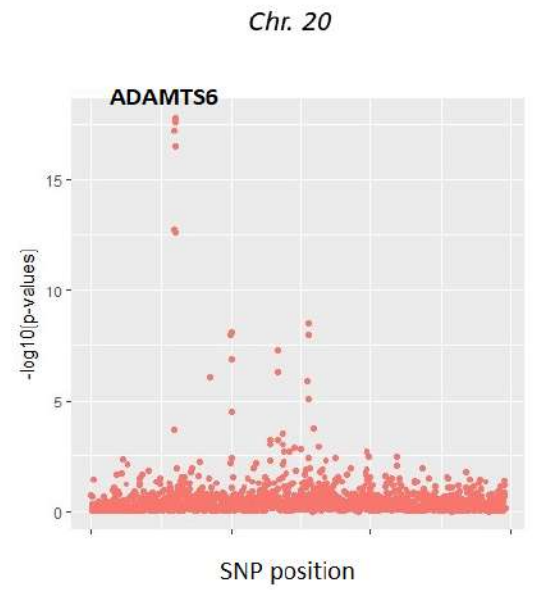

Chr. 22

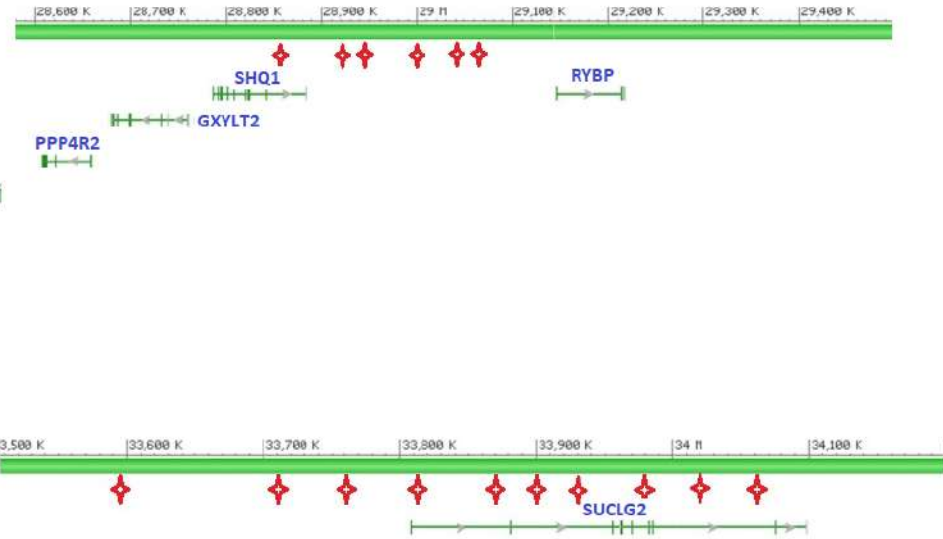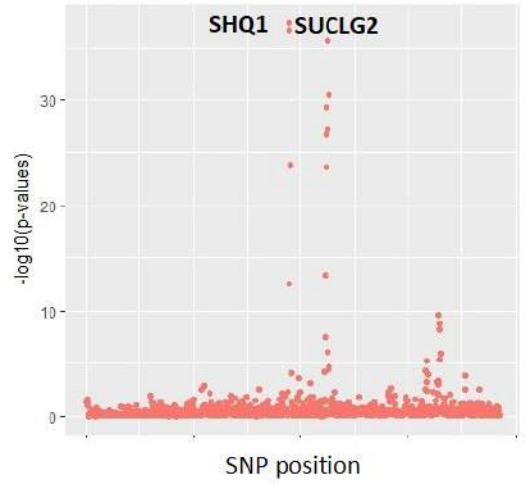

Chr. 23

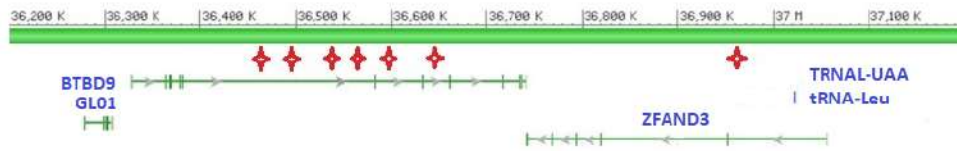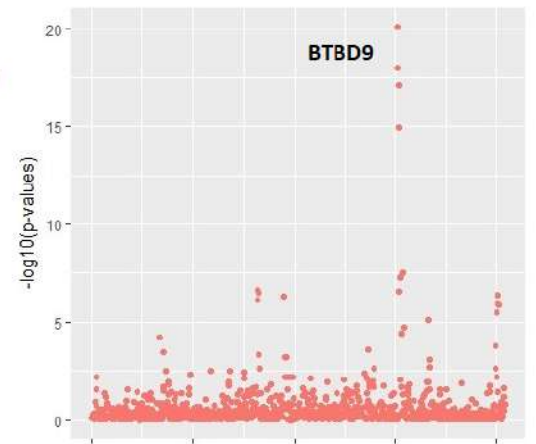

SNP position

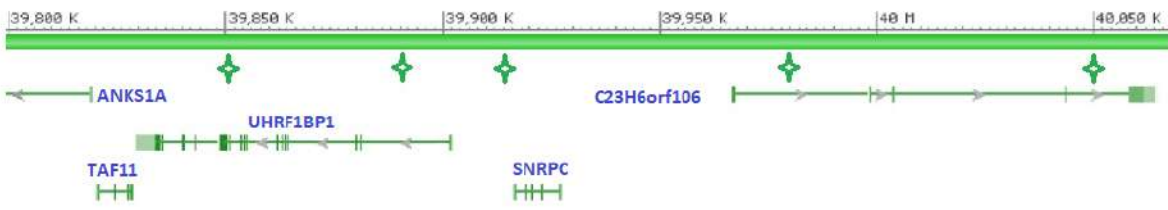

Chr. 25

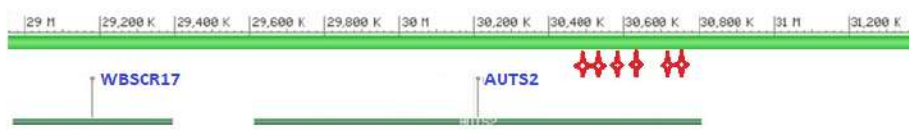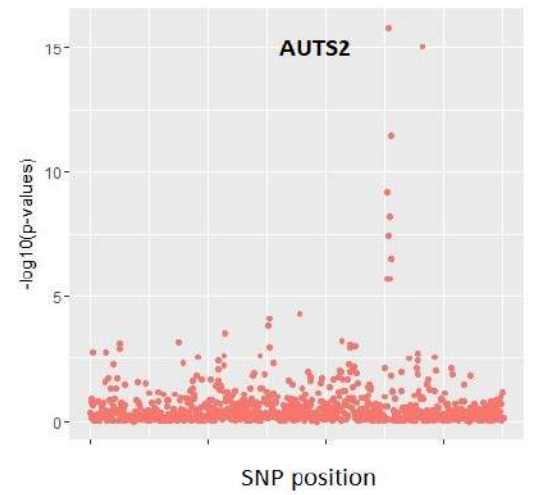

Chr. 26

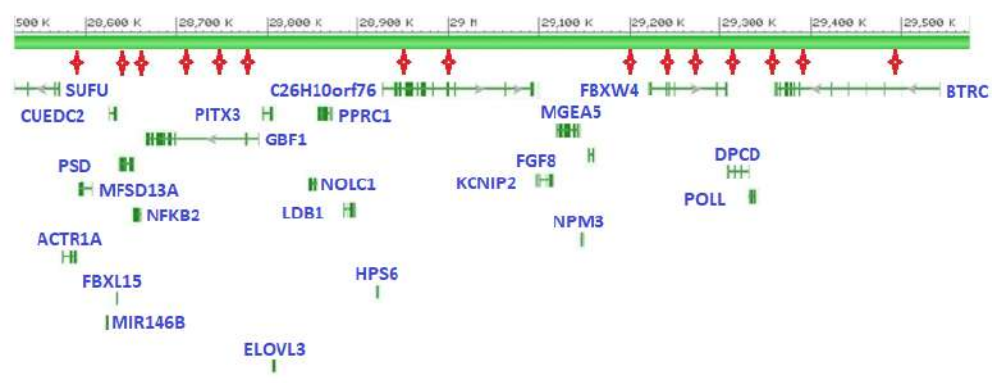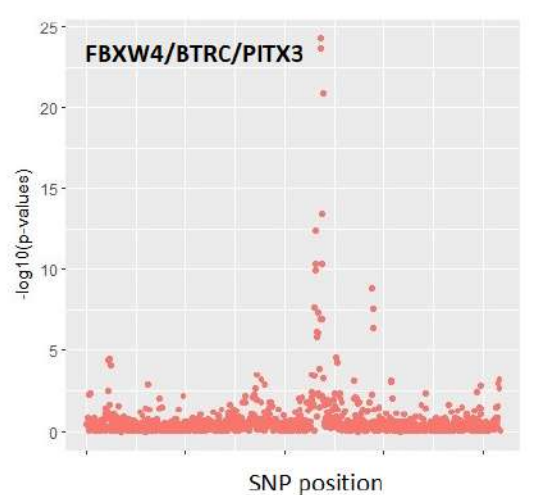

# Supplementary Table 7

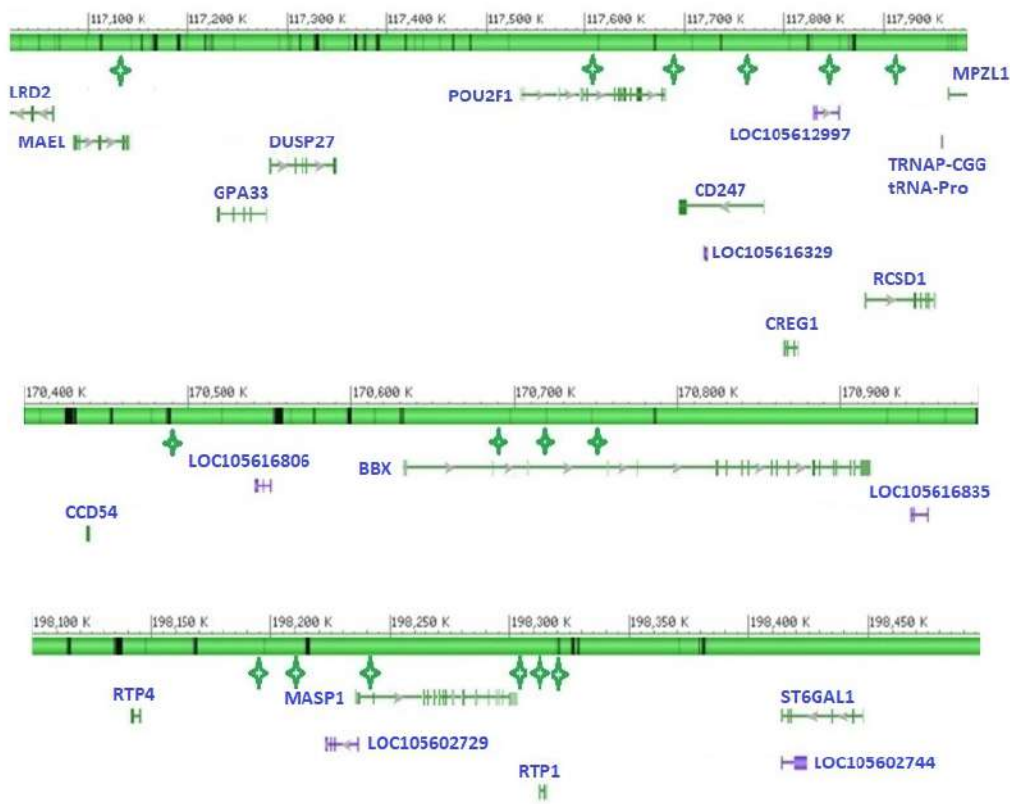

**SHEEP**

*Chr. 1*



**SHEEP**

*Chr. 2*

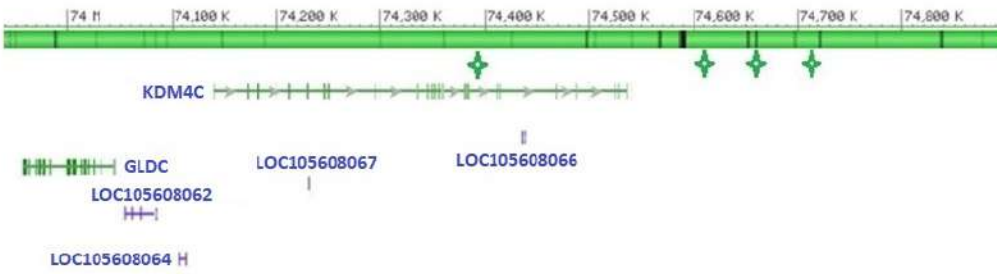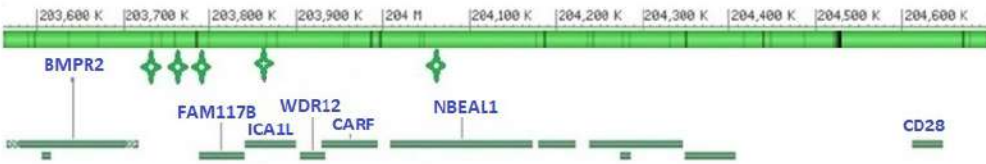

SHEEP

Chr. 3

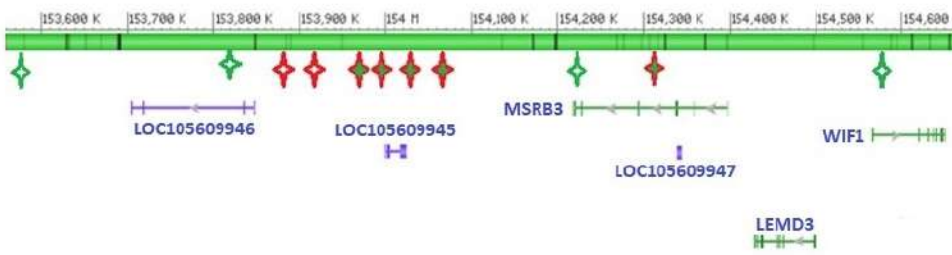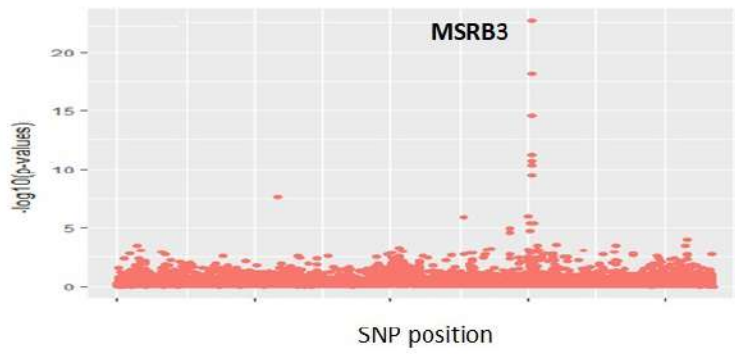

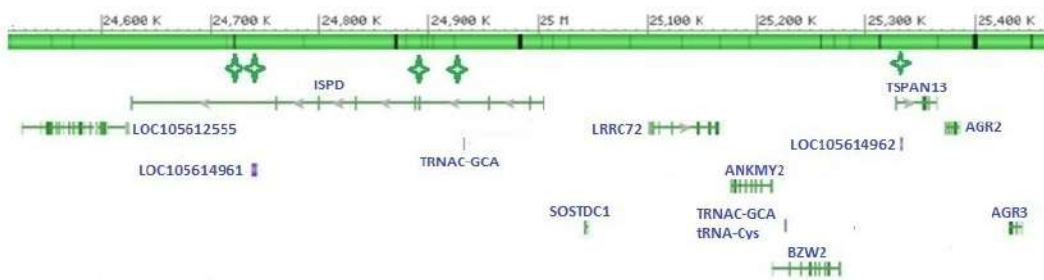

**SHEEP**

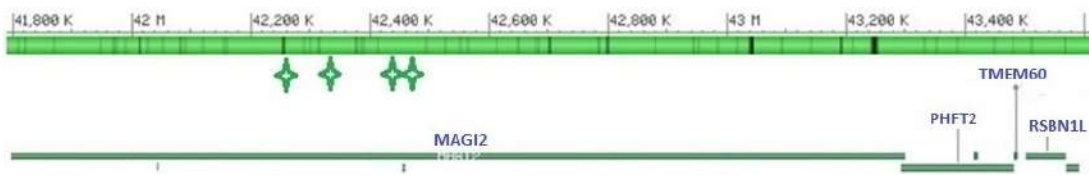

*Chr. 4*

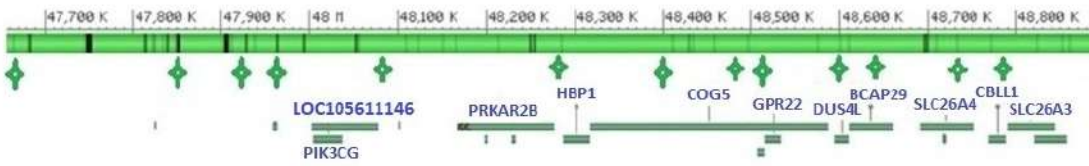

SHEEP

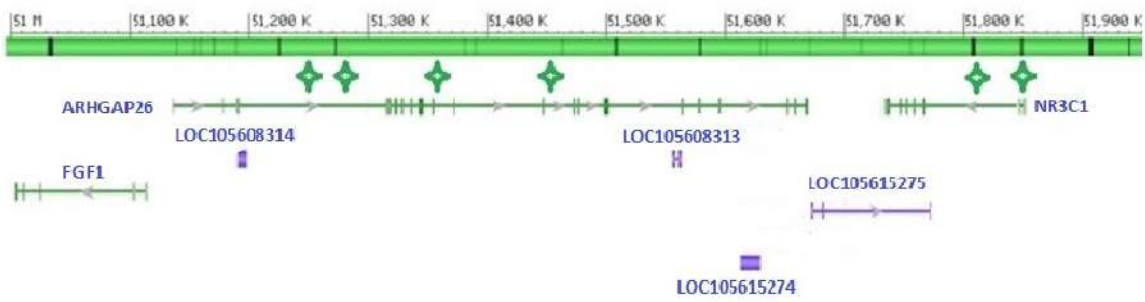

Chr. 5

SHEEP

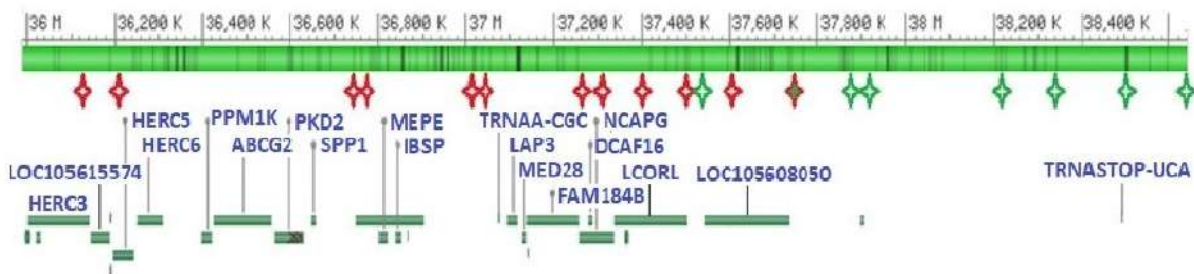

Chr. 6

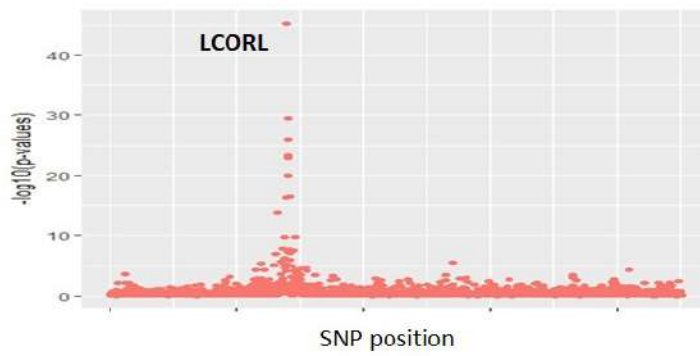

SHEEP

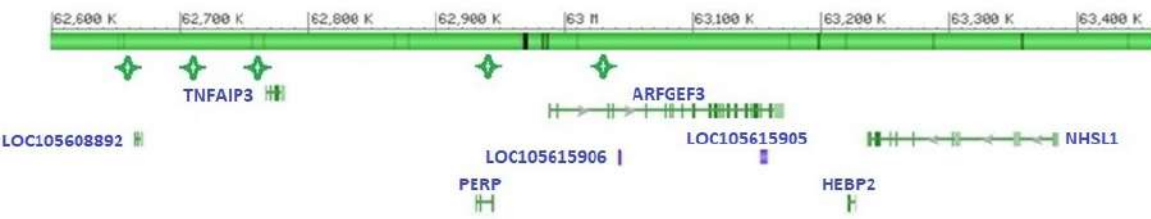

Chr. 8

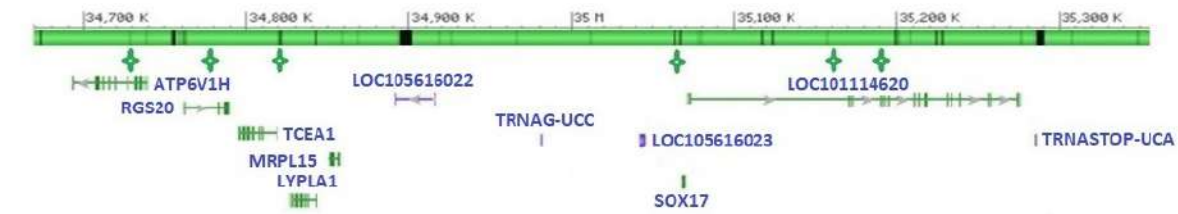

Chr. 9

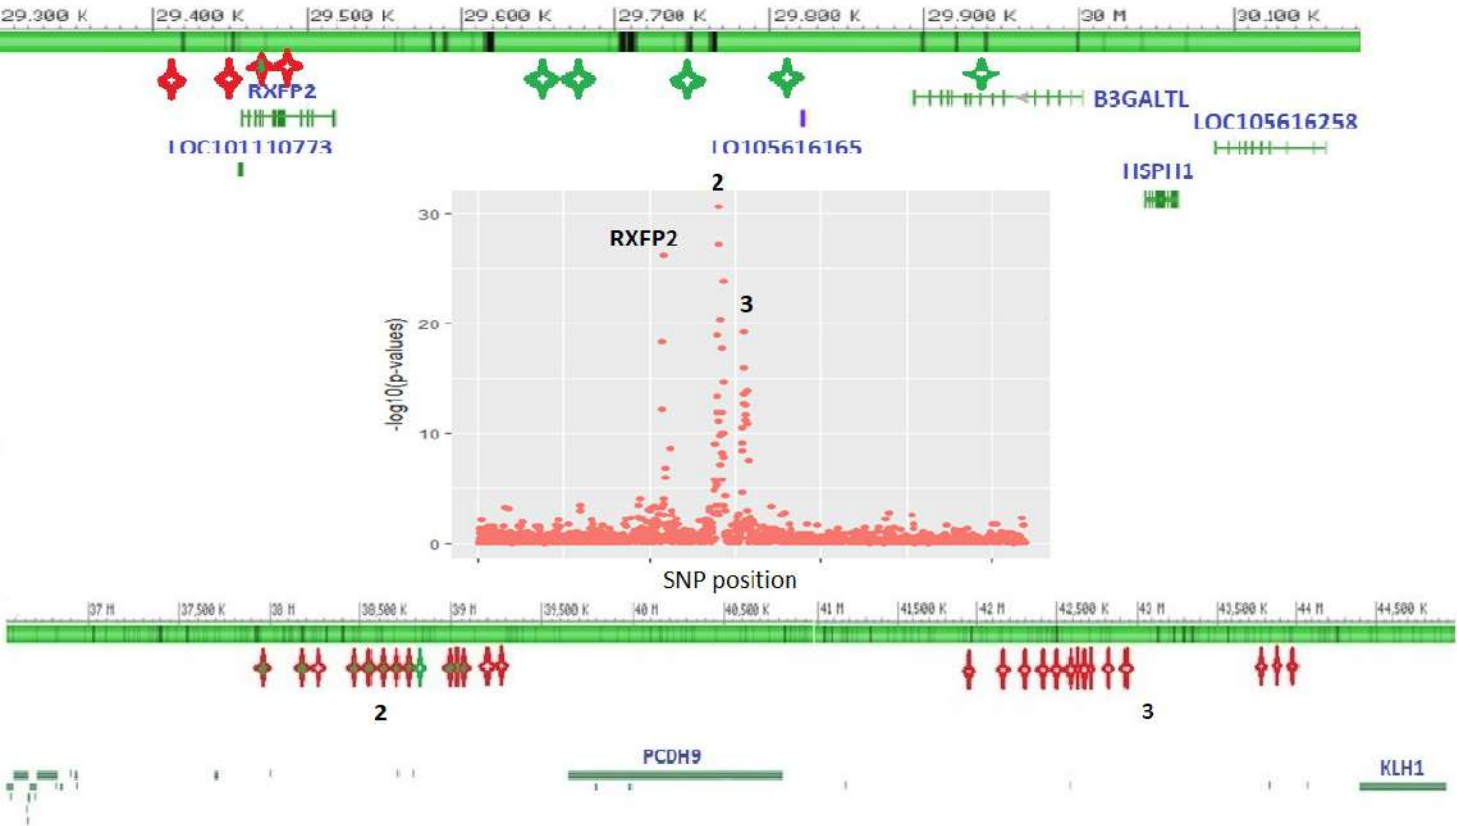

**SHEEP**

*Chr. 12*

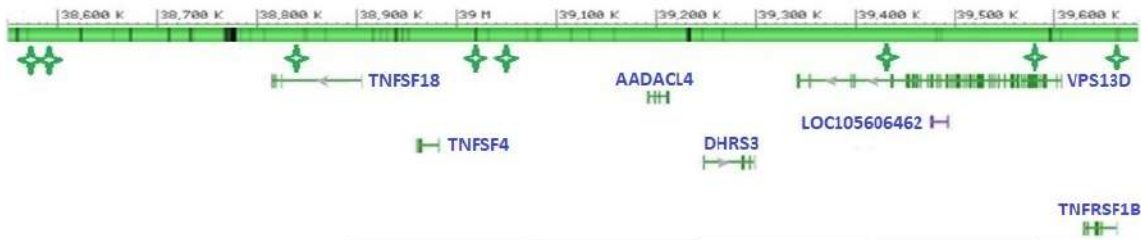

*Chr. 13*

**BMP2**

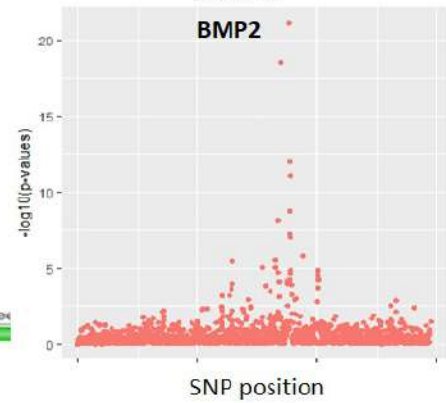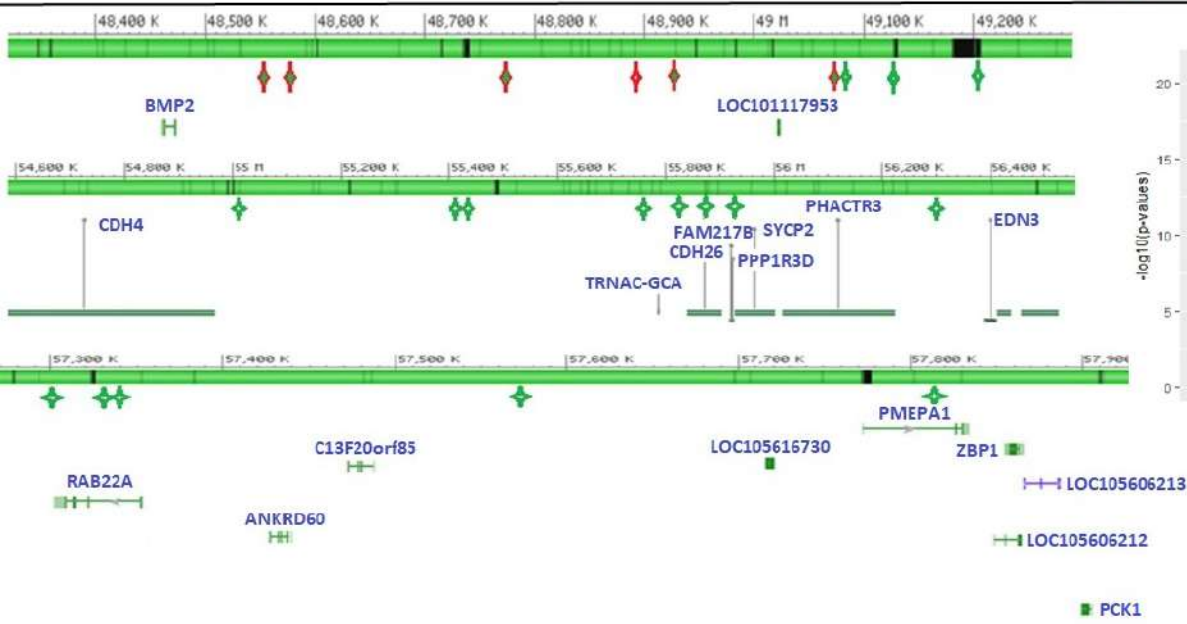



**SHEEP**

*Chr. 15*

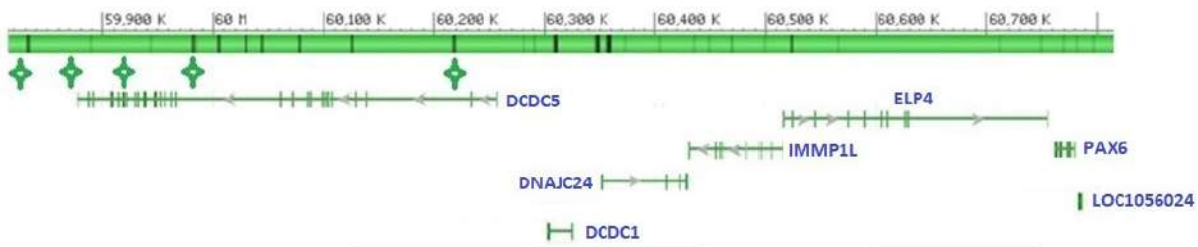

*Chr. 17*

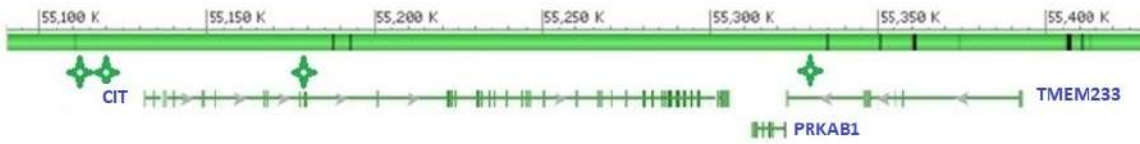

**SHEEP**

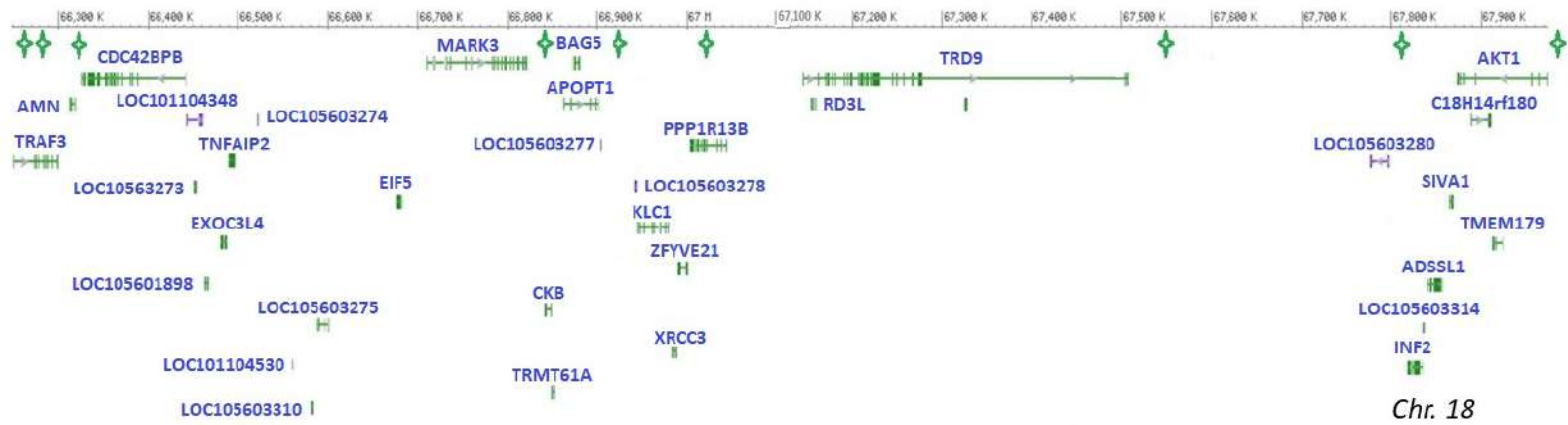

*Chr. 18*

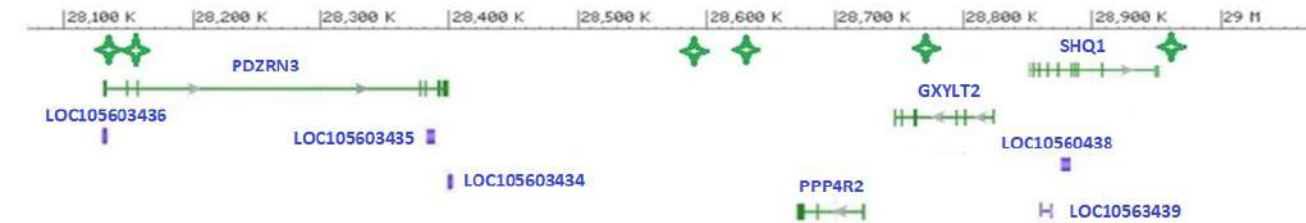

*Chr. 19*

**SHEEP**

*Chr. 21*

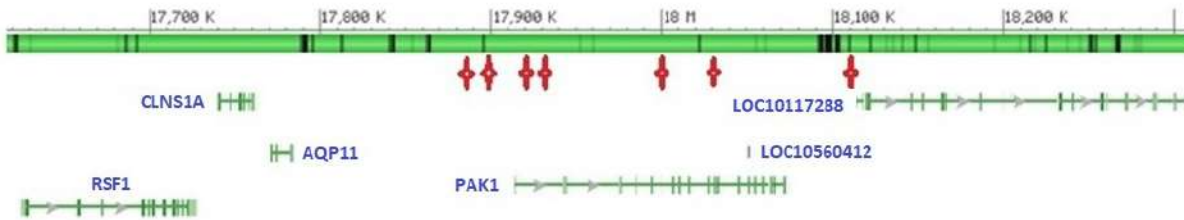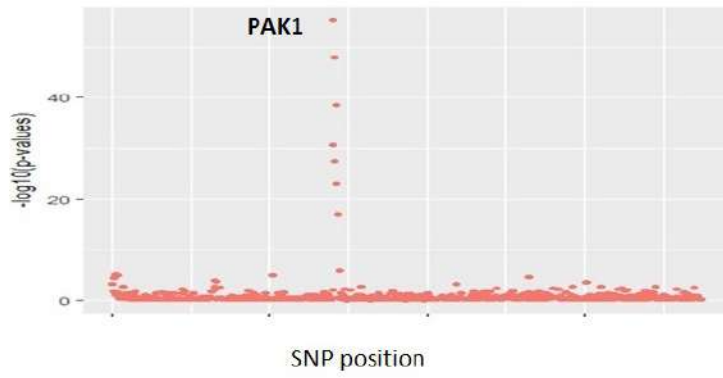

SHEEP

Chr. 25

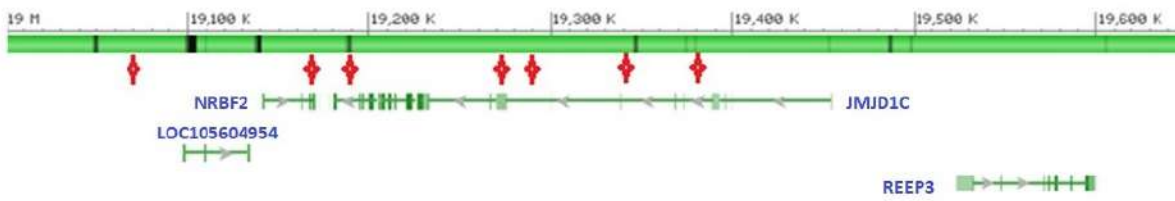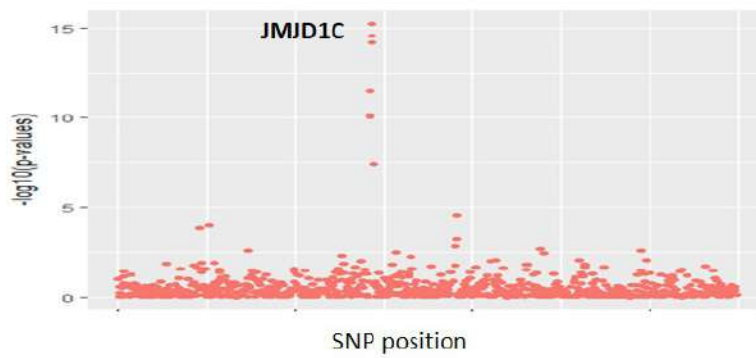

## Supplementary Text 3

### **Literature and classification of the genes identified**

The highlighted selection signatures can be clustered according to different major adaptation mechanisms. Classifying genes according to the major functions in which they can be involved should be regarded with due caution. Indeed, a large number of genes are pleiotropic, like ADAMTS6 (see Wu et al., 2019). For the classification we tried to identify in the literature the major mechanisms associated with the genes under consideration. For example, the proposed classifications did not take into account the fact that MAGI2, KDM4C and JMJD1C are also related to spermatogenesis (Sujit et al., 2018); nor the fact that VPS13 family may play a role in the maintenance of neuronal processes in mammals; or that PCDH9 and KLHL1, were found associated with fat tail deposition by the study of Mastrangelo et al. (2019). Finally, a correlation between genetic variation and a trait does not imply a causal relationship.

#### - Selection signatures involved in lipid storage

A large number of the genes identified seems to be involved in lipid metabolism. Most of them are also involved in the production/composition of milk. (i) For goats we can mention: PTGER3 (Strong et al., 1992), CTBP1 (Xu et al., 2017), TCF12 (Ozdemir Ozgenturk et al., 2017; Dunner et al., 2013), SCFD2 (Yodklaew et al., 2017; Glastonbury et al., 2016), UHRF1BP1 (Justice et al., 2018), BTRC (Ishimoto et al., 2017), CTNNA1/SIL1 (fat tail deposition in sheep: Ahbara et al., 2019), VPS13B (Liu et al., 2018; Capitan et al., 2014), WDPCP (Sazzini et al., 2016) and SUCLG2 (Silva-Vignato et al. 2019; Di Gerlando et al., 2019).

WDPCP has also been identified as being under selection in Ethiopian sheep of high altitude (Edea et al., 2019) as well as in Tibetan chicken (Wang et al., 2015), suggesting a probable mechanism common to these taxa of homeoterms. WDPCP is related to the BBSome, a protein

complex in primary cilia with important role in leptin receptor (LepR) trafficking; in humans it is linked to obesity (Foucan et al., 2018).

(ii) The identified genes in sheep implied in lipid metabolism and milk production are the followings: ARHGAP26/NR3C1 (Edea et al., 2017), ABCD4/VSX2/LIN52 (fat tail deposition: Zhu et al., 2019), POU2F1 (Lewinsky et al., 2005; Zhao et al., 2002; Pérez-Montarelo et al., 2014), VPS13D, MSRB3 and BMP2 (these last two genes are discussed in the article).

We identified VPS13B in goats and VPS13D in sheep. The gene VPS13B was found under selection in Moroccan goats (Benjelloun, 2015), was associated to adaptation to dry areas in Chinese sheep (Yang et al., 2016), and with high altitude conditions in Yaks (Qi et al., 2019). Mammalian VPS13 proteins are involved in lipid transfer (Gao et al., 2018). VPS13D is involved in lactase persistence and lipid pathway in the Maasai (Wagh et al., 2012). The VPS13B protein could play an important role in the development of nerve cells (neurons) and in the growth and development of adipocytes as reported by Seifert et al. (2011).

- Selection signatures involved in seasonal patterns and circadian behaviors

The analysis detected a strong link between the environmental gradient and the *BMPR1B* gene in goats. This gene is involved in ovarian function and fertility (Shokrollahi & Morammazi, 2018; Mulsant et al., 2001; Souza et al., 2001; Wilson et al., 2001). The influence of the photoperiod on ovarian function is well known in mammals, where melatonin provides the hormonal signal transducing day length (Walton et al., 2011). This could explain the correlation between *BMPR1B* and the latitudinal gradient, i.e. a proxy for seasonality, found in our study. Moreover, seasonal patterns are frequently expressed at many levels (foraging, adiposity, growth, immune function *etc.*, see the review by Prendergast, Nelson, & Zucker, 2009). These elements could explain the link established by Cao et al. (2015) between *BMPR1B* and growth

in sheep. The role of this gene in thermogenesis, has been demonstrated in murine adipose tissue (Whittle et al., 2015).

Similarly, SOX2, implicated in behavioral rhythms linked to environmental light cycles (Cheng et al., 2019) and DPH6, a circadian rhythm-related GO categories, were also identified by the LFMM approach as correlated with the environmental gradient in goats (see detailed discussion in the article).

- Selection signatures involved in hypoxia and/or heat stress response

Hypoxia is a major stimulus for physiological processes such as adaptation to life at high altitude, but it is also an important factor of many human pathologies, such as cancer (Kenneth & Rocha, 2008). We identified MAT2A in goats and JMJD1C and KDM4C (a JmjC domain-containing protein) in sheep. It is shown that hypoxia induces genomic DNA demethylation through the activation of HIF-1 $\alpha$  and transcriptional upregulation of MAT2A (Liu et al., 2011). Moreover, the Jumonji C (JmjC) domain contains demethylases, allowing genes such as JMJD1C and KDM4C to trigger mechanisms to respond to hypoxia (Xia et al., 2009; Melvin & Rocha, 2012). In sheep, EDN3, RAB22A and DNAJC24 were identified by us. The gene EDN3, was previously associated with hypoxia tolerance in cetaceans as vasoconstrictor-related gene (Tian et al., 2016). RAB22A was found involved in hypoxia process in humans (Wang et al., 2014). DNAJC24 was associated with high altitude adaptation in sheep (Yang et al., 2016) and appeared under selection in Ugandan goats (Onzima et al., 2018). DNAJC24 belongs to the heat shock protein 70 family, that are produced in response to exposure to stressful conditions, as cold, UV light, *etc.*

The signature centered on PIGL/LOC102188626 in goats, and bordered by NCOR1/ADORA2B deserves special attention. PIGL was previously identified in Chinese

sheep at high altitudes (Yang et al., 2016). NCOR1 belong to clock circadian gene network in cattle (Wang et al., 2015), whereas ADORA2B (an adenosine receptor, belonging to the hypoxia database) appears implicated in thermal adaptation (Wollenberg Valero et al., 2014).

Finally, in goats, both PCAadapt and LFMM highlighted the signature near UBE2R2/UBAP2 and bordered by AQP7/AQP3. UBE2R2/UBAP2, have been found to be associated with hypoxia tolerance in humans (Udpa et al., 2014) and with highlands in Chinese sheep (Yang et al., 2016). AQP7 was linked to high altitudes in yaks (Qi et al., 2019). The aquaporins AQP7 and AQP3, which belong to the hypoxia-related genes, have been identified in thermal adaptation through the regulation of evapotranspiration and cryoprotectant transport (Wollenberg Valero et al., 2014).

- Selection signatures implicated in coat color or horns

First, considering morphological adaptations, two genes known to affect coat colour, ADAMTS20 (Oget, Servin, & Palhière 2019; Bertolini et al., 2018) and TYRP1 (Gratten et al., 2007; Becker et al., 2015), were identified in goats. The pigmentation (fiber and skin), by influencing the ability to absorb solar radiation, corresponds to a primordial adaptive mechanism that is highly submitted to natural selection in mammals (Caro, 2005). In Western Europe, sheep have been subjected to strong artificial selection, over the past 200 years, on the quality of the wool but also on its colour; the white colour being particularly prized (Lauvergne, 1969; Mellah, 2015). This could explain why we did not find any selection signatures in sheep for this type of gene in connection with the environment.

With regard to horns, the RXFP2 gene is known to be strongly involved in this process (Johnston et al., 2011; Allais-Bonnet et al., 2013; Kijas et al., 2012; Fariello et al., 2014) and appeared to be selected in sheep. Indeed, the production of polled animals has been a major



objective of artificial breeding for decades. Also, we were not surprised to observe a majority of sheep breeds of the dataset without horn. RXFP2 was identified by both PCAdapt and LFMM approaches (see details in Supplementary Text 2). It is the receptor of the peptide hormone INSL3 and plays a regulatory role in testis and ovaries of various mammalian species (Hanna et al., 2010). In the seasonally breeding roe deer, with a periodic variation in the volume of the testicles, the seasonal expression of INSL3/RXFP2 was correlated with the differentiation of Leydig cells in the testis (Hombach-Klonisch et al., 2004). Interestingly, RXFP2 was associated with latitude, precipitation and temperature in free-ranging bighorn sheep (Roffler et al., 2016); and identified as being under selection in Tibetan sheep (Wei et al., 2016). Moreover, RXFP2, as MSRB3 and SLC26A4 (also identified by our study) showed signs of rapid evolution in semi-feral breeds' sheep (Pan et al., 2018). This suggests an adaptive role in the wild or, potentially, in traditional livestock farming with limited human intervention. In goats, the gene involved in the presence or absence of horn is pleiotropic, so that selecting individuals without horn induces undesirable secondary phenotypes, often in association with reduced fertility (Liron, 2011).

- Selection signatures implicated in immunity

In sheep, MASP-1, a serine protease, was identified. It functions as a component of the lectin pathway of complement activation, and as such, plays an essential role in the innate and adaptive immune response (Ammitzbøll et al., 2013). In goat, the genes PRNP, NFATC3/LRRC36 appeared selected. A large literature links PRNP to susceptibility to prion disease, in small ruminants (see Greenlee, 2019 for a review). The NFAT (nuclear factor of activated T cells) family of transcription factors is well documented for its role in T lymphocytes (Minematsu et al., 2011). LRR-containing proteins are also well known for their role in innate immunity (Ng et al., 2011). Finally, JAZF1, identified in sheep, plays a role in

adipose tissue inflammation by limiting macrophage populations and restricting their antigen presentation function. Thus, this gene seems to act at the interface between immune system and adipose metabolism (Meng et al., 2018).

- Signatures involved in lung function

The GSTCD gene, highlighted in goat, plays a role in cellular homeostasis associated with lung function (Artigas et al. 2015; Obeidat et al., 2013; Henry et al., 2019). The SLC34A2 gene, identified in the goat dataset as selected and very close to SEL1L3, was previously associated with high altitude conditions in cattle (Verma et al., 2018). Moreover, Edea et al. (2019) linked SEL1L3, with high altitude adaptation in sheep. In humans, SLC34A2 is mainly located in the lungs, and produces and recycle surfactant, that makes breathing easy (Ma et al., 2018). Finally, SEL1L3 belong to the hypoxia regulated proteins database (<http://www.hypoxiadb.com>).

- Signature selection involved in neuronal function

MAGI2, detected in sheep, may play a central role in adaptation as it was also identified by Edea et al. (2019) in high altitude Ethiopian sheep, by Qi et al. (2019) in high altitude yaks and by Yang et al. (2016) associated with desert and arid conditions in Chinese sheep. The MAGI2 gene that belongs to the hypoxia regulated proteins database, plays the critical role of maintaining synaptic strength (Danielson et al., 2012).

BTBD9, highlighted in goat, is mainly expressed in brain structure (Stefansson et al., 2007). It plays a role in the regulation of ion channels' tetramerization and gating, and hence is potentially involved in neuronal signal transduction (Stogios et al., 2005).

AUTS2, also detected in goat, is a critical neuronal gene implicated in many neurological disorders as autism. Interestingly, several predicted protein–protein interaction domains (SH2 and SH3) were observed for this protein (Oksenberg, Stevison, Wall, & Ahituv, 2013), whereas SH3 gene was found under selection in the sheep dataset. SH3 domains are eukaryotic protein domains that are involved in a plethora of cellular processes including signal transduction.

The MDGA2 gene, was identified in goats. Mutations in MDGA2 were associated with autism potentially through its ability to modulate excitatory/inhibitory transmission. Indeed, MDGA2 is able to block neuroligin-1 interaction with neuroligins and then to suppresses excitatory synapse development (Connor et al., 2016).

The genes TRPC4, TRPC6 and NBEA are discussed in detailed in the manuscript.

- “Complex” selection signatures

The following selection signatures appear more difficult to analyze and are processed on a case-by-case basis, due to the difficulty of categorizing them. In goats, HERC6 was identified as being under selection at the level of a rather small signature that was framed by HERC5 on one side and ABCG2 on the other. In sheep, HERC6 was found in a particularly large signature (it should be noted that PCAdapt predicts a zone lagged with respect to LFMM). A total of 16 genes were involved in this signature, which also included HERC5 and ABCG2. The HERC family emerged more than 595 million years ago. HERC5 and HERC6 contain a domain implicated in antiviral activity, which gives them great importance in terms of intrinsic immunity (Paparisto et al., 2018). In terms of adaptation, HERC6 was found to be linked to arid environments adaptation (Yang et al., 2016; Mdladla, 2016) and also to stress grazing adaptation (Mwacharo et al., 2018). With regard to the other genes found in the sheep signature: a very large literature links ABCG2/SPP1/LAP3/NCAPG/MEPE to milk production,

particularly ABCG2 (see Ruiz-Larrañaga et al., 2018); the remaining genes LCORL/LAP3/FAM184B may be related to growth traits (Al-Mamun et al., 2015; Lindholm-Perry et al., 2001; Bongiorno et al., 2012; Eberlein et al., 2009). Only more in-depth research will make it possible to understand the mechanisms underlying the adaptations in relation to these genome areas.

In goat, the large selection signature located on chromosome 12 and including amongst others genes RNF17, ZMYM2, PARP4 and XPO4, seems to play an important role in adaptation processes. Here again the situation is particularly complex and fine studies focused on this area are needed, while this area appears linked with lipid metabolic processes, growth, DNA repair, and also associated with adaptation to high altitude, stress grazing and arid environments (see Supplementary Table 3).

#### REFERENCES:

- Ahbara, A., Bahbahani, H., Almathen, F., Al Abri, M., Agoub, M. O., Abeba, A., ... Mwacharo, J. M. (2019). Genome-Wide Variation, Candidate Regions and Genes Associated With Fat Deposition and Tail Morphology in Ethiopian Indigenous Sheep. *Frontiers in Genetics*, 9. doi: 10.3389/fgene.2018.00699
- Allais-Bonnet, A., Grohs, C., Medugorac, I., Krebs, S., Djari, A., Graf, A., ... Capitan, A. (2013). Novel insights into the bovine polled phenotype and horn ontogenesis in Bovidae. *PLoS One*, 8(5), e63512. doi: 10.1371/journal.pone.0063512
- Al-Mamun, H. A., Kwan, P., Clark, S. A., Ferdosi, M. H., Tellam, R., & Gondro, C. (2015). Genome-wide association study of body weight in Australian Merino sheep reveals an orthologous region on OAR6 to human and bovine genomic regions affecting height and weight. *Genetics, Selection, Evolution: GSE*, 47, 66. doi: 10.1186/s12711-015-0142-4
- Ammitzbøll, C. G., Steffensen, R., Nielsen, H. J., Thiel, S., Stengaard-Pedersen, K., Bøgsted, M., & Jensenius, J. C. (2013). Polymorphisms in the MASP1 Gene Are Associated with Serum Levels of MASP-1, MASP-3, and MASP44. *PLoS ONE*, 8(9), e73317. doi: 10.1371/journal.pone.0073317
- Artigas, M. S., Wain, L. V., Miller, S., Kheirallah, A. K., Huffman, J. E., Ntalla, I., ... Tobin, M. D. (2015). Sixteen new lung function signals identified through 1000 Genomes Project reference panel imputation. *Nature Communications*, 6(1), 1–12. doi:

10.1038/ncomms9658

- Becker, D., Otto, M., Ammann, P., Keller, I., Drögemüller, C., & Leeb, T. (2015). The brown coat colour of Coppernecked goats is associated with a non-synonymous variant at the TYRP1 locus on chromosome 8. *Animal Genetics*, 46(1), 50–54. doi: 10.1111/age.12240
- Benjelloun, B. (2015). *Diversité des génomes et adaptation locale des petits ruminants d'un pays méditerranéen : le Maroc* (PhD thesis). Université Grenoble Alpes, France.
- Bertolini, F., Servin, B., Talenti, A., Rochat, E., Kim, E. S., Oget, C., ... the AdaptMap consortium. (2018). Signatures of selection and environmental adaptation across the goat genome post-domestication. *Genetics Selection Evolution*, 50(1), 57. doi: 10.1186/s12711-018-0421-y
- Bongiorni, S., Mancini, G., Chillemi, G., Pariset, L., & Valentini, A. (2012). Identification of a Short Region on Chromosome 6 Affecting Direct Calving Ease in Piedmontese Cattle Breed. *PLOS ONE*, 7(12), e50137. doi: 10.1371/journal.pone.0050137
- Capitan, A., Michot, P., Baur, A., Saintilan, R., Hozé, C., Valour, D., Guillaume, F., ... Fritz, S. (2014). Genetic tools to improve reproduction traits in dairy cattle. *Reproduction, Fertility, and Development*, 27(1):14–21.
- Cao, J., Wei, C., Liu, D., Wang, H., Wu, M., Xie, Z., ... Du, L. (2015). DNA methylation Landscape of body size variation in sheep. *Scientific Reports*, 5, 13950. doi: 10.1038/srep13950
- Caro, T. (2005). The Adaptive Significance of Coloration in Mammals. *BioScience*, 55(2), 125–136. doi: 10.1641/0006-3568(2005)055[0125:TASOCI]2.0.CO;2
- Cheng, A. H., Bouchard-Cannon, P., Hegazi, S., Lowden, C., Fung, S. W., Chiang, C.-K., ... Cheng, H.-Y. M. (2019). SOX2-Dependent Transcription in Clock Neurons Promotes the Robustness of the Central Circadian Pacemaker. *Cell Reports*, 26(12), 3191–3202.e8. doi: 10.1016/j.celrep.2019.02.068
- Connor, S. A., Ammendrup-Johnsen, I., Chan, A. W., Kishimoto, Y., Murayama, C., Kurihara, N., ... Craig, A. M. (2016). Altered Cortical Dynamics and Cognitive Function upon Haploinsufficiency of the Autism-Linked Excitatory Synaptic Suppressor MDGA2. *Neuron*, 91(5), 1052–1068. doi: 10.1016/j.neuron.2016.08.016
- Danielson, E., Zhang, N., Metallo, J., Kaleka, K., Shin, S. M., Gerges, N., & Lee, S. H. (2012). S-SCAM/MAGI-2 is an essential synaptic scaffolding molecule for the GluA2-containing maintenance pool of AMPA receptors. *The Journal of Neuroscience: The Official Journal of the Society for Neuroscience*, 32(20), 6967–6980. doi: 10.1523/JNEUROSCI.0025-12.2012
- Di Gerlando, R., Sutura, A.M., Mastrangelo, S., Tolone, M., Portolano, B., Sottile, G., Bagnato, A., Sardina, M.T.(2019). Genome-wide association study between CNVs and milk production traits in Valle del Belice sheep. *PLoS ONE*, 14(4):e0215204. <https://doi.org/10.1371/journal.pone.0215204>
- Dunner, S., Sevane, N., Garcia, D., Levéziel, H., Williams, J. L., Mangin, B., & Valentini, A. (2013). Genes involved in muscle lipid composition in 15 European Bos taurus breeds. *Animal Genetics*, 44(5), 493–501. doi: 10.1111/age.12044
- Eberlein, A., Takasuga, A., Setoguchi, K., Pfuhl, R., Flisikowski, K., Fries, R., ... Kühn, C. (2009). Dissection of genetic factors modulating fetal growth in cattle indicates a substantial role of the non-SMC condensin I complex, subunit G (NCAPG) gene.

- Genetics*, 183(3), 951–964. doi: 10.1534/genetics.109.106476
- Edea, Z., Dadi, H., Dessie, T., & Kim, K.-S. (2019). Genomic signatures of high-altitude adaptation in Ethiopian sheep populations. *Genes & Genomics*, 41(8), 973–981. doi: 10.1007/s13258-019-00820-y
- Edea, Z., Hong, J.-K., Jung, J.-H., Kim, D.-W., Kim, Y.-M., Kim, E.-S., ... Kim, K.-S. (2017). Detecting selection signatures between Duroc and Duroc synthetic pig populations using high-density SNP chip. *Animal Genetics*, 48(4), 473–477. doi: 10.1111/age.12559
- Foucan, L., Larifla, L., Durand, E., Rambhojan, C., Armand, C., Michel, C.-T., ... Bonnefond, A. (2018). High Prevalence of Rare Monogenic Forms of Obesity in Obese Guadeloupean Afro-Caribbean Children. *The Journal of Clinical Endocrinology & Metabolism*, 103(2), 539–545. doi: 10.1210/jc.2017-01956
- Gao, L., Bonilla-Henao, V., García-Flores, P., Arias-Mayenco, I., Ortega-Sáenz, P., & López-Barneo, J. (2017). Gene expression analyses reveal metabolic specifications in acute O<sub>2</sub>-sensing chemoreceptor cells. *The Journal of Physiology*, 595(18), 6091–6120. doi: 10.1113/JP274684
- Glastonbury, C. A., Viñuela, A., Buil, A., Halldorsson, G. H., Thorleifsson, G., Helgason, H., ... Small, K. S. (2016). Adiposity-Dependent Regulatory Effects on Multi-tissue Transcriptomes. *The American Journal of Human Genetics*, 99(3), 567–579. doi: 10.1016/j.ajhg.2016.07.001
- Gratten, J., Beraldi, D., Lowder, B. ., McRae, A. ., Visscher, P. ., Pemberton, J. ., & Slate, J. (2007). Compelling evidence that a single nucleotide substitution in TYRP1 is responsible for coat-colour polymorphism in a free-living population of Soay sheep. *Proceedings of the Royal Society B: Biological Sciences*, 274(1610), 619–626. doi: 10.1098/rspb.2006.3762
- Greenlee, J. J. (2019). Review: Update on Classical and Atypical Scrapie in Sheep and Goats. *Veterinary Pathology*, 56(1), 6–16. doi: 10.1177/0300985818794247
- Henry, A. P., Probert, K., Stewart, C. E., Thakker, D., Bhaker, S., Azimi, S., ... Sayers, I. (2019). Defining a role for lung function associated gene GSTCD in cell homeostasis. *Respiratory Research*, 20(1), 172. doi: 10.1186/s12931-019-1146-3
- Ishimoto, K., Hayase, A., Kumagai, F., Kawai, M., Okuno, H., Hino, N., ... Doi, T. (2017). Degradation of human Lipin-1 by BTRC E3 ubiquitin ligase. *Biochemical and Biophysical Research Communications*, 488(1), 159–164. doi: 10.1016/j.bbrc.2017.04.159
- Johnston, S. E., McEwan, J. C., Pickering, N. K., Kijas, J. W., Beraldi, D., Pilkington, J. G., ... Slate, J. (2011). Genome-wide association mapping identifies the genetic basis of discrete and quantitative variation in sexual weaponry in a wild sheep population. *Molecular Ecology*, 20(12), 2555–2566. doi: 10.1111/j.1365-294X.2011.05076.x
- Justice, A. E., Karaderi, T., Highland, H. M., Young, K. L., Graff, M., Lu, Y., ... Lindgren, C. M. (2018). Protein-Coding Variants Implicate Novel Genes Related to Lipid Homeostasis Contributing to Body Fat Distribution. *BioRxiv*, 352674. doi: 10.1101/352674
- Kenneth, N. S., & Rocha, S. (2008). Regulation of gene expression by hypoxia. *The Biochemical Journal*, 414(1), 19–29. doi: 10.1042/BJ20081055
- Lauvergne, J.-J. (1969). Hérité de la couleur blanche du mouton berrichon croisé a des Solognots. *Annales de Génétique et de Sélection Animale*, 1(3), 219–226.
- Lewinsky, R. H., Jensen, T. G. K., Møller, J., Stensballe, A., Olsen, J., & Troelsen, J. T. (2005). T-13910 DNA variant associated with lactase persistence interacts with Oct-1 and stimulates lactase promoter activity in vitro. *Human Molecular Genetics*, 14(24), 3945–3953. doi: 10.1093/hmg/ddi418

- Lindholm-Perry, A. K., Sexten, A. K., Kuehn, L. A., Smith, T. P. L., King, D. A., Shackelford, S. D., ... Freetly, H. C. (2011). Association, effects and validation of polymorphisms within the NCAPG - LCORL locus located on BTA6 with feed intake, gain, meat and carcass traits in beef cattle. *BMC Genetics*, 12, 103. doi: 10.1186/1471-2156-12-103
- Liron, M. (2011). *Ecornage du chevreau: procédure, anesthésie et analgésie* (PhD thesis). Faculté de Médecine de Créteil, France.
- Liu, Q., Liu, L., Zhao, Y., Zhang, J., Wang, D., Chen, J., ... Liu, Z. (2011). Hypoxia induces genomic DNA demethylation through the activation of HIF-1 $\alpha$  and transcriptional upregulation of MAT2A in hepatoma cells. *Molecular Cancer Therapeutics*, 10(6), 1113–1123. doi: 10.1158/1535-7163.MCT-10-1010
- Liu, J.J., Liang, A.X., Campanile, G., Plastow, G., Zhang, C., Wang, Z., Salzano, A., ... Yang, L.G. (2018). Genome-wide association studies to identify quantitative trait loci affecting milk production traits in water buffalo. *J Dairy Sci.*, 101(1):433–44.
- Ma, T., Qu, D., Yan, B., Zhang, Q., Ren, J., & Hu, Y. (2018). Effect of SLC34A2 gene mutation on extracellular phosphorus transport in PAM alveolar epithelial cells. *Experimental and Therapeutic Medicine*, 15(1), 310–314. doi: 10.3892/etm.2017.5380
- Mastrangelo, S., Bahbahani, H., Moioli, B., Ahbara, A., Abri, M. A., Almuthen, F., ... Ciani, E. (2019). Novel and known signals of selection for fat deposition in domestic sheep breeds from Africa and Eurasia. *PLOS ONE*, 14(6), e0209632. doi: 10.1371/journal.pone.0209632
- Mdladla, K. (2016). *Landscape genomic approach to investigate genetic adaptation in South African indigenous goat populations* (PhD thesis). University of KwaZulu-NatalPietermaritzburg. South Africa.
- Mellah, M. (2015). L'École d'Alfort, les bêtes à laine et le perfectionnement des arts économiques. *Histoire Societes Rurales*, 43(1), 73–101.
- Melvin, A., & Rocha, S. (2012). Chromatin as an oxygen sensor and active player in the hypoxia response. *Cellular Signalling*, 24(1), 35–43. doi:10.1016/j.cellsig.2011.08.019
- Meng, F., Lin, Y., Yang, M., Li, M., Yang, G., Hao, P., & Li, L. (2018). JAZF1 Inhibits Adipose Tissue Macrophages and Adipose Tissue Inflammation in Diet-Induced Diabetic Mice. *BioMed Research International*, 2018, 4507659. doi: 10.1155/2018/4507659
- Minematsu, H., Shin, M. J., Celil Aydemir, A. B., Kim, K.-O., Nizami, S. A., Chung, G.-J., & Lee, F. Y.-I. (2011). Nuclear presence of nuclear factor of activated T cells (NFAT) c3 and c4 is required for Toll-like receptor-activated innate inflammatory response of monocytes/macrophages. *Cellular Signalling*, 23(11), 1785–1793. doi: 10.1016/j.cellsig.2011.06.013
- Mulsant, P., Lecerf, F., Fabre, S., Schibler, L., Monget, P., Lanneluc, I., ... Elsen, J. M. (2001). Mutation in bone morphogenetic protein receptor-IB is associated with increased ovulation rate in Booroola Mérino ewes. *Proceedings of the National Academy of Sciences of the United States of America*, 98(9), 5104–5109. doi: 10.1073/pnas.091577598
- Mwacharo, J., Elbeltagy A.R., Kim E.-S., Aboul-Naga A.M., Rischkowsky B. & Rothschild M.F. (2018). Intra-population SNP analysis identifies signatures for grazing stress tolerance in Egyptian local goats. *Proceedings of the World Congress on Genetics Applied to Livestock Production*, 459, 1–6.
- Ng, A. C. Y., Eisenberg, J. M., Heath, R. J. W., Huett, A., Robinson, C. M., Nau, G. J., & Xavier, R. J. (2011). Human leucine-rich repeat proteins: a genome-wide bioinformatic

- categorization and functional analysis in innate immunity. *Proceedings of the National Academy of Sciences*, 108(Supplement 1), 4631–4638. doi: 10.1073/pnas.1000093107
- Obeidat, M., Miller, S., Probert, K., Billington, C. K., Henry, A. P., Hodge, E., ... Hall, I. P. (2013). GSTCD and INTS12 regulation and expression in the human lung. *PLoS One*, 8(9), e74630. doi: 10.1371/journal.pone.0074630
- Oget, C., Servin, B., & Palhière, I. (2019). Genetic diversity analysis of French goat populations reveals selective sweeps involved in their differentiation. *Animal Genetics*, 50(1), 54–63. doi: 10.1111/age.12752
- Oksenberg, N., Stevison, L., Wall, J. D., & Ahituv, N. (2013). Function and Regulation of AUTS2, a Gene Implicated in Autism and Human Evolution. *PLoS Genetics*, 9(1). doi: 10.1371/journal.pgen.1003221
- Onzima, R. B., Upadhyay, M. R., Doekes, H. P., Brito, L. F., Bosse, M., Kanis, E., ... Crooijmans, R. P. M. A. (2018). Genome-Wide Characterization of Selection Signatures and Runs of Homozygosity in Ugandan Goat Breeds. *Frontiers in Genetics*, 9. doi: 10.3389/fgene.2018.00318
- Ozdemir Ozgenturk, N., Omeroglu Ulu, Z., Ulu, S., Un, C., Ozdem Oztabak, K., & Altunatmaz, K. (2017). Preparing and Analyzing Expressed Sequence Tags (ESTs) Library for the Mammary Tissue of Local Turkish Kivircik Sheep. *International Journal of Genomics*, 2017. doi: 10.1155/2017/9604762
- Paparisto, E., Woods, M. W., Coleman, M. D., Moghadasi, S. A., Kochar, D. S., Tom, S. K., ... Barr, S. D. (2018). Evolution-Guided Structural and Functional Analyses of the HERC Family Reveal an Ancient Marine Origin and Determinants of Antiviral Activity. *Journal of Virology*, 92(13). doi: 10.1128/JVI.00528-18
- Pérez-Montarelo, D., Madsen, O., Alves, E., Rodríguez, M. C., Folch, J. M., Noguera, J. L., ... Fernández, A. I. (2014). Identification of genes regulating growth and fatness traits in pig through hypothalamic transcriptome analysis. *Physiological Genomics*, 46(6), 195–206. doi: 10.1152/physiolgenomics.00151.2013
- Prendergast, B. J., Nelson, R. J., & Zucker, I. (2009). Mammalian Seasonal Rhythms: Behavior and Neuroendocrine Substrates. In: Pfafli, D.W., Arnold, A.P., Fahrbach, S. E., Etgen, A. M., Rubin, R. T. (Eds.), *Hormones, brain and behavior*, p. 507-538.
- Qi, X., Zhang, Q., He, Y., Yang, L., Zhang, X., Shi, P., ... Su, B. (2019). The Transcriptomic Landscape of Yaks Reveals Molecular Pathways for High Altitude Adaptation. *Genome Biology and Evolution*, 11(1), 72–85. doi: 10.1093/gbe/evy264
- Ruiz-Larrañaga, O., Langa, J., Rendo, F., Manzano, C., Iriando, M., & Estonba, A. (2018). Genomic selection signatures in sheep from the Western Pyrenees. *Genetics, Selection, Evolution : GSE*, 50. doi: 10.1186/s12711-018-0378-x
- Sazzini, M., De Fanti, S., Cherubini, A., Quagliariello, A., Profiti, G., Martelli, P. L., ... Luiselli, D. (2016). Ancient pathogen-driven adaptation triggers increased susceptibility to non-celiac wheat sensitivity in present-day European populations. *Genes & Nutrition*, 11. doi: 10.1186/s12263-016-0532-4
- Seifert, W., Kühnisch, J., Maritzen, T., Horn, D., Haucke, V., & Hennies, H. C. (2011). Cohen syndrome-associated protein, COH1, is a novel, giant Golgi matrix protein required for Golgi integrity. *The Journal of Biological Chemistry*, 286(43), 37665–37675. doi: 10.1074/jbc.M111.267971



- Shokrollahi, B., & Morammazi, S. (2018). Polymorphism of GDF9 and BMPR1B genes and their association with litter size in Markhoz goats. *Reproduction in Domestic Animals*, 53(4), 971–978. doi: 10.1111/rda.13196
- Silva-Vignato, B., Coutinho, L. L., Poleti, M. D., Cesar, A. S. M., Moncau, C. T., Regitano, L. C. A., & Balieiro, J. C. C. (2019). Gene co-expression networks associated with carcass traits reveal new pathways for muscle and fat deposition in Nelore cattle. *BMC Genomics*, 20(1), 32. doi: 10.1186/s12864-018-5345-y
- Souza, C. J., MacDougall, C., MacDougall, C., Campbell, B. K., McNeilly, A. S., & Baird, D. T. (2001). The Booroola (FecB) phenotype is associated with a mutation in the bone morphogenetic receptor type 1 B (BMPR1B) gene. *The Journal of Endocrinology*, 169(2), R1-6. doi: 10.1677/joe.0.169r001
- Stefansson, H., Rye, D. B., Hicks, A., Petursson, H., Ingason, A., Thorgeirsson, T. E., ... Stefansson, K. (2007). A genetic risk factor for periodic limb movements in sleep. *The New England Journal of Medicine*, 357(7), 639–647. doi: 10.1056/NEJMoa072743
- Stogios, P. J., Downs, G. S., Jauhal, J. J. S., Nandra, S. K., & Privé, G. G. (2005). Sequence and structural analysis of BTB domain proteins. *Genome Biology*, 6(10), R82. doi: 10.1186/gb-2005-6-10-r82
- Strong, P., Coleman, R.A., Humphrey, P.P. (1992). Prostanoid-induced inhibition of lipolysis in rat isolated adipocytes: probable involvement of EP3 receptors. *Prostaglandins*, 43, 559–566.
- Tian, R., Wang, Z., Niu, X., Zhou, K., Xu, S., & Yang, G. (2016). Evolutionary Genetics of Hypoxia Tolerance in Cetaceans during Diving. *Genome Biology and Evolution*, 8(3), 827–839. doi: 10.1093/gbe/evw037
- Udpa, N., Ronen, R., Zhou, D., Liang, J., Stobdan, T., Appenzeller, O., ... Haddad, G. G. (2014). Whole genome sequencing of Ethiopian highlanders reveals conserved hypoxia tolerance genes. *Genome Biology*, 15(2), R36–R36. doi: 10.1186/gb-2014-15-2-r36
- Verma, P., Sharma, A., Sodhi, M., Thakur, K., Kataria, R. S., Niranjana, S. K., ... Mukesh, M. (2018). Transcriptome Analysis of Circulating PBMCs to Understand Mechanism of High Altitude Adaptation in Native Cattle of Ladakh Region. *Scientific Reports*, 8. doi: 10.1038/s41598-018-25736-7
- Wagh, K., Bhatia, A., Alexe, G., Reddy, A., Ravikumar, V., Seiler, M., ... Bhanot, G. (2012). Lactase Persistence and Lipid Pathway Selection in the Maasai. *PLOS ONE*, 7(9), e44751. doi: 10.1371/journal.pone.0044751
- Walton, J. C., Weil, Z. M., & Nelson, R. J. (2011). Influence of Photoperiod on Hormones, Behavior, and Immune Function. *Frontiers in Neuroendocrinology*, 32(3), 303–319. doi: 10.1016/j.yfrne.2010.12.003
- Wang, M.-S., Li, Y., Peng, M.-S., Zhong, L., Wang, Z.-J., Li, Q.-Y., ... Zhang, Y.-P. (2015). Genomic Analyses Reveal Potential Independent Adaptation to High Altitude in Tibetan Chickens. *Molecular Biology and Evolution*, 32(7), 1880–1889. doi: 10.1093/molbev/msv071
- Wang, M., Zhou, Z., Khan, M. J., Gao, J., & Looor, J. J. (2015). Clock circadian regulator (CLOCK) gene network expression patterns in bovine adipose, liver, and mammary gland at 3 time points during the transition from pregnancy into lactation. *Journal of Dairy Science*, 98(7), 4601–4612. doi: 10.3168/jds.2015-9430
- Wang, T., Gilkes, D. M., Takano, N., Xiang, L., Luo, W., Bishop, C. J., ... Semenza, G. L. (2014). Hypoxia-inducible factors and RAB22A mediate formation of microvesicles

- that stimulate breast cancer invasion and metastasis. *Proceedings of the National Academy of Sciences of the United States of America*, 111(31), E3234-3242. doi: 10.1073/pnas.1410041111
- Wilson, T., Wu, X. Y., Juengel, J. L., Ross, I. K., Lumsden, J. M., Lord, E. A., ... Montgomery, G. W. (2001). Highly prolific Booroola sheep have a mutation in the intracellular kinase domain of bone morphogenetic protein IB receptor (ALK-6) that is expressed in both oocytes and granulosa cells. *Biology of Reproduction*, 64(4), 1225–1235. doi: 10.1095/biolreprod64.4.1225
- Whittle, A. J., Jiang, M., Peirce, V., Relat, J., Virtue, S., Ebinuma, H., ... Bujo, H. (2015). Soluble LR11/SorLA represses thermogenesis in adipose tissue and correlates with BMI in humans. *Nature Communications*, 6(1), 1–12. doi: 10.1038/ncomms9951
- Wollenberg Valero, K. C., Pathak, R., Prajapati, I., Bankston, S., Thompson, A., Usher, J., & Isokpehi, R. D. (2014). A candidate multimodal functional genetic network for thermal adaptation. *PeerJ*, 2, e578. doi: 10.7717/peerj.578
- Wu, P., Wang, K., Yang, Q., Zhou, J., Chen, D., Liu, Y., ... Tang, G. (2019). Whole-genome re-sequencing association study for direct genetic effects and social genetic effects of six growth traits in Large White pigs. *Scientific Reports*, 9(1), 1–12. doi: 10.1038/s41598-019-45919-0
- Xia, X., & Kung, A. L. (2009). Preferential binding of HIF-1 to transcriptionally active loci determines cell-type specific response to hypoxia. *Genome Biology*, 10(10), R113. doi: 10.1186/gb-2009-10-10-r113
- Xu, S.-S., Ren, X., Yang, G.-L., Xie, X.-L., Zhao, Y.-X., Zhang, M., ... Li, M.-H. (2017). Genome-wide association analysis identifies the genetic basis of fat deposition in the tails of sheep (*Ovis aries*). *Animal Genetics*, 48(5), 560–569. doi: 10.1111/age.12572
- Yang, J., Li, W.-R., Lv, F.-H., He, S.-G., Tian, S.-L., Peng, W.-F., ... Liu, M.-J. (2016). Whole-Genome Sequencing of Native Sheep Provides Insights into Rapid Adaptations to Extreme Environments. *Molecular Biology and Evolution*, 33(10), 2576–2592. doi: 10.1093/molbev/msw129
- Yodklaew, P., Koonawootrittriron, S., Elzo, M. A., Suwanasopee, T., & Laodim, T. (2017). Genome-wide association study for lactation characteristics, milk yield and age at first calving in a Thai multibreed dairy cattle population. *Agriculture and Natural Resources*, 51(3), 223–230. doi: 10.1016/j.anres.2017.04.002
- Zhao, F.-Q., Adachi, K., & Oka, T. (2002). Involvement of Oct-1 in transcriptional regulation of beta-casein gene expression in mouse mammary gland. *Biochimica Et Biophysica Acta*, 1577(1), 27–37. doi: 10.1016/s0167-4781(02)00402-5
- Zhu, C., Huang, X., Li, M., Qin, S., Fang, S., & Ma, Y. (2019). *GWAS and post-GWAS to Identification of Genes Associated with Sheep Tail Fat Deposition*. Retrieved from <https://www.preprints.org/manuscript/201906.0093/v1>
